# Supplementary material for: Effects of alterations in positron emission tomography imaging parameters on radiomics features
Source: PLoS One. 2019 Sep 5;14(9):e0221877. doi: 10.1371/journal.pone.0221877 (PMC6728031; doi:10.1371/journal.pone.0221877)
Supplement: S3 Dataset — Radiomics data from the reconstructions on the Siemens scanner. (XLSX) [file pone.0221877.s003.xlsx]

## Sheet: BedTime_64Levels
ROI	BedTime(min)	-333-1AutoCorrelation	-333-1ClusterProminence	-333-1ClusterShade	-333-1ClusterTendendcy	-333-1Contrast	-333-1Correlation	-333-1DifferenceEntropy	-333-1Dissimilarity	-333-1Energy	-333-1Entropy	-333-1Homogeneity	-333-1Homogeneity2	-333-1InformationMeasureCorr1	-333-1InformationMeasureCorr2	-333-1InverseDiffMomentNorm	-333-1InverseDiffNorm	-333-1InverseVariance	-333-1MaxProbability	-333-1SumAverage	-333-1SumEntropy	-333-1SumVariance	-333-1Variance	-333GrayLevelNonuniformity	-333HighGrayLevelRunEmpha	-333LongRunEmphasis	-333LongRunHighGrayLevelEmpha	-333LongRunLowGrayLevelEmpha	-333LowGrayLevelRunEmpha	-333RunLengthNonuniformity	-333RunPercentage	-333ShortRunEmphasis	-333ShortRunHighGrayLevelEmpha	-333ShortRunLowGrayLevelEmpha	EnergyNorm	GlobalEntropy	GlobalMax	GlobalMean	GlobalMedian	GlobalMin	GlobalStd	GlobalUniformity	Kurtosis	Skewness	Variance	Busyness	Coarseness	Complexity	Contrast
material11	2	706.148	2.35075e+06	18738.7	1054.43	73.8	0.869176	3.93427	5.37404	0.00253863	9.97661	0.364003	0.294881	-0.236723	0.965074	0.982865	0.927995	0.260759	0.0186458	42.9414	6.6436	2371.96	1054.43	0.021198	863.47	1.80315	1183.98	0.0332702	0.0144803	0.661407	0.843488	0.904927	804.2	0.0126394	761.73	2.0978	64	21.6553	16.8807	2.32275	17.1125	0.251034	2.19834	0.650137	292.838	0.00625976	0.295483	5574.66	0.499212
material21	2	979.724	1.68935e+06	-1458.45	945.806	94.7583	0.817873	4.32355	7.00407	0.000913857	10.7007	0.265435	0.183799	-0.163436	0.922571	0.977626	0.906206	0.17487	0.00810138	55.3881	6.78884	3307.7	945.806	0.0171489	1131.83	1.34331	1438.49	0.0156948	0.0097091	0.784434	0.912684	0.941468	1069.6	0.00890954	1060.55	2.13131	64	27.8293	28.3779	2.27661	16.9154	0.239401	1.79008	0.0494056	286.131	0.00343701	0.246809	5797.61	0.578983
material31	2	984.608	996347	-3825.12	619.071	102.125	0.716793	4.37605	7.34861	0.000967192	10.5757	0.244746	0.159806	-0.132547	0.881687	0.976114	0.901948	0.156536	0.00958926	58.4935	6.58791	3313.26	619.071	0.0195627	1154.43	1.28118	1383.92	0.0140762	0.00767685	0.8121	0.926669	0.94939	1105.55	0.00694842	1075.81	1.95329	64	29.4024	30.0391	2.19971	14.5377	0.292177	2.31346	-0.19138	211.345	0.00304716	0.227528	6106.58	0.474374
material41	2	1071.43	1.38125e+06	-2400.97	831.416	119.663	0.748372	4.50581	8.09135	0.000815102	10.7811	0.231153	0.148908	-0.141967	0.898745	0.97223	0.893253	0.14332	0.0088169	59.7828	6.74828	3644.08	831.416	0.0171384	1257.99	1.2718	1486.39	0.0146684	0.00754783	0.824216	0.930375	0.953353	1209.62	0.00680849	1175	2.08804	64	30.1255	29.8468	2.23047	16.3554	0.252686	1.88572	-0.041786	267.5	0.00338749	0.21633	6609.43	0.615944
material51	2	969.827	1.49344e+06	1828.9	871.654	108.206	0.779141	4.39996	7.4353	0.00093402	10.7006	0.251881	0.168895	-0.161382	0.920462	0.974996	0.901491	0.16073	0.0099236	55.8199	6.78343	3276.23	871.654	0.0169275	1153.73	1.34504	1381.62	0.0175448	0.00814257	0.793958	0.916629	0.944703	1103.34	0.0072264	1065.64	2.10244	64	28.2064	27.1321	2.24585	16.434	0.250928	1.91481	0.131715	270.077	0.00407754	0.231741	6087.12	0.58292
material61	2	863.211	1.10384e+06	3874.7	705.198	98.0952	0.755768	4.32462	7.0179	0.00136057	10.4225	0.267966	0.187357	-0.164268	0.91933	0.977103	0.906429	0.183174	0.00783322	53.3455	6.63697	2886.88	705.198	0.0186408	1046.16	1.42446	1267.23	0.0153266	0.00823258	0.773126	0.903623	0.939355	1002.59	0.00747583	949.948	2.01572	64	26.924	25.0249	2.24585	15.0027	0.268742	2.16084	0.222767	225.081	0.00424271	0.242207	5813.24	0.480995
material71	2	1062.26	1.21478e+06	-1577.19	725.163	104.996	0.747046	4.39754	7.4617	0.000974831	10.6133	0.249814	0.168647	-0.154926	0.91203	0.975415	0.900712	0.168499	0.006844	60.2401	6.69905	3591.81	725.163	0.0178534	1247.91	1.30758	1522.88	0.00959037	0.00684254	0.799611	0.920302	0.945851	1189.57	0.0064482	1163.99	2.08565	64	30.4534	30.2852	2.30737	15.3826	0.256883	2.17824	-0.0614579	236.626	0.0033775	0.230267	6071.92	0.517891
material81	2	1152.03	1.48362e+06	-9455.59	770.976	89.2881	0.792418	4.32012	7.13306	0.000895265	10.5386	0.240786	0.155305	-0.155036	0.911013	0.97857	0.903399	0.153866	0.0049282	62.6613	6.66737	3906.3	770.976	0.0193724	1303.75	1.23887	1596.83	0.0118637	0.00818526	0.834551	0.936044	0.95597	1244.67	0.0077205	1239.29	2.03357	64	31.4308	33.4844	2.27661	15.8568	0.273086	2.18675	-0.350914	251.439	0.00249742	0.246029	5991.08	0.515427
material91	2	944.739	1.47457e+06	-8525.49	857.033	64.3615	0.860296	4.10005	6.09132	0.00135431	10.2061	0.262408	0.173975	-0.191949	0.941013	0.984206	0.91549	0.167106	0.00965507	54.6469	6.5979	3165.74	857.033	0.0218531	1070.16	1.31541	1315.04	0.0196719	0.0111075	0.805829	0.922568	0.948045	1014.01	0.0102532	1003.78	1.9994	64	27.2729	30.4543	2.33813	16.1257	0.269373	1.80485	-0.184849	260.038	0.00227719	0.286309	5353.51	0.458583
material101	2	638.632	1.32103e+06	5498.88	866.487	59.5911	0.871305	4.01551	5.65724	0.00256589	9.75783	0.284936	0.199049	-0.230726	0.959965	0.985425	0.921421	0.199047	0.0171585	41.8047	6.46582	2115.32	866.487	0.0296462	748.923	1.47799	927.416	0.0324354	0.014845	0.763386	0.898398	0.93691	712.203	0.0132773	678.351	1.97413	64	20.8214	17.7344	2.4458	15.6507	0.269609	1.85846	0.396024	244.943	0.00329515	0.317292	5027.63	0.402576
material11	3	703.405	2.33683e+06	18684.1	1049.83	73.1878	0.86966	3.9265	5.35079	0.00257869	9.96234	0.364804	0.296196	-0.237324	0.965208	0.98299	0.928264	0.264677	0.0180023	42.8599	6.63812	2361.85	1049.83	0.0212456	853.008	1.81611	1219.1	0.0336506	0.0146308	0.649393	0.838297	0.900286	787.748	0.012737	758.114	2.09495	64	21.6054	16.8115	2.32275	17.0699	0.251488	2.20209	0.650698	291.38	0.00578116	0.297895	5562.87	0.49216
material21	3	985.373	1.70775e+06	-1502.6	949.954	94.4445	0.819142	4.31719	6.98172	0.000918858	10.6953	0.265622	0.183924	-0.165347	0.924428	0.977702	0.9065	0.177273	0.00832617	55.5516	6.79042	3327.61	949.954	0.0170939	1139.04	1.33452	1432.74	0.0154798	0.00973854	0.789712	0.914732	0.943128	1079.03	0.00894865	1066.42	2.1377	64	27.917	28.5317	2.27661	16.9444	0.238386	1.79206	0.0473936	287.113	0.00341524	0.247901	5760.56	0.579309
material31	3	1019.72	1.07404e+06	-4150.8	644.749	105.425	0.718934	4.39984	7.4674	0.000936098	10.627	0.243756	0.159179	-0.13211	0.881925	0.975406	0.900627	0.152721	0.00966184	59.4943	6.61695	3440.76	644.749	0.0193413	1191.08	1.26726	1417.14	0.01351	0.0076019	0.821622	0.930474	0.952319	1141.1	0.00697863	1113.58	1.97981	64	29.9076	30.562	2.21509	14.8036	0.287304	2.30099	-0.195614	219.146	0.00310151	0.22512	6101.92	0.497478
material41	3	1070.9	1.39091e+06	-2394.81	835.655	119.704	0.749411	4.5051	8.09756	0.00082184	10.7772	0.230753	0.148731	-0.141958	0.898663	0.972213	0.893167	0.145125	0.0088128	59.7298	6.74836	3642.68	835.655	0.0170767	1259.16	1.28422	1486.09	0.0154759	0.00745046	0.818702	0.928424	0.951676	1208.8	0.00665951	1174.72	2.09128	64	30.1051	29.8314	2.23047	16.3842	0.252123	1.87998	-0.0394104	268.441	0.00338708	0.216451	6618.46	0.617762
material51	3	966.945	1.49435e+06	1837.19	871.556	107.922	0.779635	4.39714	7.41946	0.000957133	10.6975	0.252314	0.169142	-0.161547	0.920582	0.975058	0.901691	0.160355	0.0109008	55.7148	6.78093	3266.08	871.556	0.0170759	1152.58	1.32198	1352.31	0.0166321	0.00836452	0.807923	0.921973	0.949062	1110.6	0.00742439	1061.9	2.09989	64	28.1414	27.0013	2.24585	16.4316	0.251199	1.91803	0.133501	269.998	0.00407229	0.232495	6069.69	0.581095
material61	3	881.762	1.13108e+06	3911.27	713.08	99.8137	0.754425	4.33864	7.06812	0.00134383	10.4434	0.269471	0.189221	-0.164327	0.919702	0.976746	0.905919	0.179573	0.0097966	53.9795	6.65042	2953.12	713.08	0.0186054	1061.77	1.40693	1298.3	0.0150439	0.00796515	0.774497	0.905896	0.939354	1013.12	0.00722379	970.966	2.02707	64	27.2593	25.4248	2.26123	15.0974	0.26708	2.16149	0.216669	227.93	0.00430898	0.240317	5809.12	0.49191
material71	3	1040.37	1.15681e+06	-1575.83	707.55	102.386	0.747176	4.3814	7.35682	0.00103408	10.568	0.254668	0.173894	-0.1555	0.911995	0.975974	0.901932	0.16897	0.00835235	59.6348	6.68041	3511.72	707.55	0.0181204	1224.92	1.3207	1498.25	0.00985632	0.00686736	0.792142	0.917449	0.943521	1166.96	0.00644538	1139.54	2.0704	64	30.1404	29.9775	2.29199	15.2033	0.25978	2.1778	-0.0654288	231.141	0.00329827	0.232619	6086.82	0.500517
material81	3	1182.72	1.55881e+06	-9814.11	789.644	91.7194	0.79187	4.33849	7.22784	0.000873934	10.5717	0.238561	0.153104	-0.155376	0.911922	0.978033	0.902319	0.151989	0.00493003	63.5056	6.68583	4018.13	789.644	0.0191157	1338.58	1.22976	1613.8	0.0115763	0.00803025	0.837404	0.937751	0.956671	1279.57	0.00755968	1270.52	2.05529	64	31.8249	33.9227	2.29199	16.0545	0.269481	2.18799	-0.351715	257.747	0.00254458	0.2438	5977.58	0.533123
material91	3	923.402	1.40877e+06	-8231.47	838.454	62.5576	0.861139	4.08079	6.0039	0.00139179	10.1724	0.264948	0.176796	-0.192371	0.940895	0.984624	0.916549	0.171617	0.00950066	54.0158	6.58223	3088.4	838.454	0.0221158	1047.41	1.29391	1269.29	0.019348	0.0113651	0.816183	0.927253	0.951077	996.005	0.010584	982.254	1.98399	64	26.9858	30.0698	2.32275	15.9402	0.272025	1.80235	-0.185426	254.09	0.00224778	0.288742	5358.18	0.443944
material101	3	639.282	1.35469e+06	5919.61	874.304	59.9136	0.871735	4.02174	5.65482	0.00258577	9.76758	0.288708	0.203351	-0.228409	0.95887	0.985353	0.921517	0.196154	0.0168079	41.7461	6.47139	2118.61	874.304	0.0296537	752.892	1.45585	901.49	0.032458	0.0149825	0.774331	0.90284	0.940401	719.003	0.0134733	679.519	1.97956	64	20.8053	17.6575	2.46118	15.7093	0.268646	1.87354	0.408198	246.782	0.00354392	0.317222	4792.21	0.418876
material11	4	708.827	2.3873e+06	19035.9	1060.32	73.6752	0.870062	3.92759	5.35744	0.00260074	9.95552	0.366446	0.298093	-0.23956	0.966147	0.982892	0.928238	0.263586	0.0176408	42.9961	6.64348	2381.83	1060.32	0.0211544	855.773	1.83058	1241.79	0.0338201	0.0147278	0.646731	0.837034	0.899342	786.262	0.0128607	763.975	2.10156	64	21.6733	16.873	2.32275	17.1553	0.250691	2.20709	0.653534	294.303	0.00607294	0.297418	5544	0.498155
material21	4	1012.49	1.79367e+06	-1674	972.458	96.6665	0.819169	4.33421	7.06048	0.000899993	10.7296	0.264636	0.183076	-0.165089	0.924658	0.977224	0.90563	0.175061	0.0084201	56.3399	6.8098	3425.69	972.458	0.0168346	1167.51	1.34287	1483.92	0.0154388	0.00945629	0.787456	0.913522	0.942543	1104.62	0.00863475	1095.07	2.15494	64	28.3008	28.9932	2.30737	17.1518	0.235801	1.79301	0.0429263	294.184	0.00348334	0.245618	5737.17	0.599198
material31	4	978.584	982459	-3854.71	616.733	100.746	0.719169	4.36629	7.29849	0.000959172	10.5709	0.246141	0.161276	-0.132267	0.88115	0.976403	0.902512	0.157712	0.00914683	58.2954	6.58795	3290.39	616.733	0.0195903	1146.56	1.28875	1381.37	0.014472	0.00775534	0.810636	0.925825	0.949079	1095.78	0.00706147	1069.56	1.95359	64	29.3202	29.8929	2.19971	14.4884	0.29131	2.30173	-0.196645	209.914	0.00313254	0.229363	5827.7	0.482687
material41	4	1076.74	1.42004e+06	-2441.74	844.919	120.156	0.750999	4.50984	8.10655	0.000826938	10.7846	0.23179	0.149835	-0.142368	0.899347	0.972123	0.893097	0.143239	0.00942189	59.8515	6.75381	3664.28	844.919	0.0169815	1264.65	1.29076	1512.49	0.0155245	0.00752522	0.816989	0.926739	0.951359	1213.8	0.00670484	1180.51	2.10427	64	30.1623	29.8776	2.23047	16.4557	0.249739	1.87773	-0.0383055	270.791	0.00339724	0.216464	6618.47	0.623037
material51	4	985.54	1.52449e+06	1884.82	880.804	109.877	0.778179	4.40831	7.49323	0.00091605	10.7233	0.249496	0.166169	-0.160661	0.920008	0.974648	0.900848	0.159716	0.00990646	56.3137	6.78991	3333.41	880.804	0.0169012	1172.3	1.3166	1373.45	0.0159558	0.00812017	0.807024	0.922109	0.948597	1128.62	0.0072031	1080.85	2.1162	64	28.4121	27.2551	2.26123	16.5422	0.248539	1.91517	0.132385	273.646	0.00410755	0.230851	6079.91	0.593041
material61	4	881.89	1.12626e+06	3963.26	712.093	99.7767	0.754206	4.33918	7.07231	0.0013651	10.441	0.269024	0.188671	-0.164099	0.919427	0.976747	0.905851	0.179169	0.0108822	53.993	6.64764	2953.67	712.093	0.0184946	1064.01	1.4158	1306.57	0.014549	0.00795456	0.767621	0.902579	0.937194	1015.01	0.00718332	970.411	2.02716	64	27.253	25.394	2.26123	15.0903	0.266746	2.16069	0.217314	227.718	0.00437046	0.240421	5810.71	0.490878
material71	4	1043.07	1.16954e+06	-1489.27	709.988	102.62	0.747431	4.38465	7.36585	0.00106046	10.5623	0.254707	0.173798	-0.156256	0.912775	0.975918	0.901833	0.167616	0.00825881	59.707	6.68091	3521.75	709.988	0.0180519	1226.34	1.35938	1540.81	0.00995472	0.00700293	0.784216	0.912061	0.941717	1163.44	0.00659007	1142.42	2.07825	64	30.1767	30.0621	2.29199	15.2257	0.257947	2.18441	-0.0615152	231.821	0.00330783	0.232002	6098.18	0.502939
material81	4	1174.08	1.54164e+06	-9690.3	785.348	90.9098	0.792505	4.32973	7.19352	0.000882847	10.5617	0.238649	0.153433	-0.155345	0.911727	0.978213	0.902721	0.156846	0.00482349	63.2603	6.6814	3986.52	785.348	0.0192535	1327.66	1.22014	1603.32	0.011372	0.00808176	0.839962	0.939245	0.957259	1269.03	0.00762625	1262.6	2.0518	64	31.7266	33.8689	2.29199	16.0022	0.27005	2.18896	-0.349787	256.071	0.00250953	0.244732	5966.51	0.527859
material91	4	937.701	1.45008e+06	-8408.44	850.005	63.3518	0.861277	4.08714	6.03752	0.00136724	10.1923	0.263348	0.175278	-0.192816	0.941486	0.984443	0.916157	0.173365	0.00965721	54.444	6.59433	3139.6	850.005	0.0219899	1059.98	1.30885	1308.71	0.0191378	0.0114092	0.804192	0.922982	0.947249	1003.71	0.0106193	996.021	1.99098	64	27.1709	30.3159	2.32275	16.0572	0.269979	1.80191	-0.18706	257.832	0.00227666	0.288016	5337.09	0.451996
material101	4	627.945	1.31046e+06	5765.21	862.081	58.4718	0.872964	3.99907	5.56383	0.00270912	9.72274	0.292844	0.207906	-0.231398	0.959934	0.985693	0.922694	0.201623	0.0175558	41.33	6.4519	2078.56	862.081	0.0294416	736.259	1.46597	900.848	0.0328476	0.0156741	0.765269	0.899603	0.937315	699.565	0.0141165	666.314	1.96534	64	20.5804	17.2576	2.4458	15.5846	0.271362	1.86359	0.407416	242.88	0.00341078	0.320552	4846.79	0.407954
material11	5	704.143	2.33617e+06	18665.7	1049.96	73.1518	0.869734	3.92456	5.33969	0.00258136	9.95448	0.367892	0.29958	-0.238978	0.965878	0.982997	0.928435	0.261812	0.0176676	42.8925	6.63872	2364.3	1049.96	0.0211652	848.949	1.85241	1253.94	0.0341967	0.0145165	0.638156	0.832564	0.896189	775.693	0.0126313	759.093	2.09689	64	21.6191	16.7654	2.32275	17.0813	0.251443	2.20317	0.651133	291.769	0.00584807	0.298256	5554.97	0.492671
material21	5	1008.6	1.78249e+06	-1628.67	969.13	96.3107	0.819211	4.32941	7.03816	0.000899699	10.7213	0.265612	0.184434	-0.165587	0.925035	0.97731	0.905917	0.178116	0.00792142	56.2279	6.80597	3411.66	969.13	0.0169138	1161.58	1.33825	1480.1	0.0151843	0.0093464	0.78906	0.914076	0.943001	1097.9	0.0085294	1091.45	2.15669	64	28.2608	28.9701	2.29199	17.1121	0.235519	1.79582	0.0437178	292.823	0.00347948	0.246025	5742.37	0.595425
material31	5	1002.75	1.0348e+06	-4006.9	633.556	103.167	0.719934	4.38451	7.38877	0.000945766	10.603	0.244554	0.159662	-0.132141	0.881539	0.975882	0.901494	0.154438	0.00942379	58.9966	6.60604	3378.33	633.556	0.0194087	1173.3	1.2765	1404.03	0.0140476	0.00761557	0.819519	0.929187	0.951838	1124.61	0.00693751	1095.32	1.97163	64	29.6605	30.2698	2.21509	14.6838	0.288032	2.2973	-0.196306	215.613	0.00318741	0.227309	5824.71	0.500831
material41	5	1076.06	1.39911e+06	-2408.17	838.883	119.963	0.749783	4.50912	8.11139	0.000813443	10.7803	0.231029	0.149083	-0.142523	0.899473	0.972148	0.892998	0.143517	0.008389	59.8777	6.75042	3661.39	838.883	0.016995	1262.65	1.29027	1518.97	0.0150621	0.00744086	0.815646	0.926631	0.950888	1210.59	0.00664432	1179.62	2.09725	64	30.1688	29.8391	2.23047	16.4167	0.251118	1.87739	-0.0396563	269.507	0.00337147	0.216458	6629.85	0.620297
material51	5	991.951	1.54778e+06	1912.69	887.573	110.461	0.778644	4.41343	7.51955	0.000910167	10.7362	0.249147	0.1661	-0.159608	0.919085	0.974511	0.900539	0.160469	0.00990412	56.4862	6.79575	3356.71	887.573	0.0169429	1175.73	1.30478	1374.74	0.0160565	0.00821128	0.811771	0.924487	0.949915	1132.73	0.00732605	1087.12	2.12353	64	28.4823	27.2705	2.26123	16.6107	0.246999	1.91344	0.133	275.917	0.00415148	0.23051	6073.93	0.59905
material61	5	897.96	1.15672e+06	4041.71	721.921	101.481	0.753509	4.35075	7.13199	0.00134654	10.4662	0.267894	0.187613	-0.164103	0.919806	0.976391	0.905189	0.177864	0.0108533	54.5106	6.65855	3011.74	721.921	0.0182422	1081.78	1.43392	1346.7	0.0143818	0.00784456	0.7615	0.90022	0.935257	1030.42	0.00708151	987.53	2.03767	64	27.5017	25.6248	2.27661	15.206	0.265079	2.15952	0.215147	231.224	0.00410119	0.239031	6061.55	0.4853
material71	5	1023.63	1.11565e+06	-1451.33	693.604	100.372	0.747167	4.36913	7.28506	0.00109189	10.5352	0.256584	0.175684	-0.155945	0.911996	0.976397	0.902733	0.169111	0.00968169	59.1717	6.66505	3450.55	693.604	0.0183084	1204.22	1.33675	1498.87	0.00966668	0.00690086	0.792602	0.916086	0.944146	1145.17	0.00651421	1123.08	2.05477	64	29.9483	29.8007	2.27661	15.0405	0.262355	2.18655	-0.0642498	226.216	0.00325078	0.234058	6090.17	0.487356
material81	5	1172.77	1.53748e+06	-9549.36	785.306	90.783	0.792755	4.32968	7.18965	0.00088174	10.5635	0.239242	0.154014	-0.155412	0.911837	0.978238	0.902763	0.155536	0.00461147	63.2182	6.68347	3981.48	785.306	0.0192483	1326.89	1.21593	1590.57	0.0114501	0.00806745	0.842857	0.940349	0.958109	1269.37	0.0076217	1261.07	2.05201	64	31.7034	33.792	2.29199	16.0006	0.269905	2.18652	-0.345557	256.02	0.00253202	0.245104	5942.41	0.527364
material91	5	932.651	1.43079e+06	-8378.35	843.662	62.9578	0.861115	4.08303	6.01121	0.00137448	10.1801	0.265058	0.177175	-0.192824	0.94134	0.984537	0.9165	0.173889	0.00973451	54.313	6.58909	3121.23	843.662	0.0219352	1059.79	1.30786	1292.09	0.0193102	0.011219	0.810798	0.924531	0.949578	1008.71	0.0104126	992.204	1.99091	64	27.1348	30.2928	2.32275	15.9994	0.270784	1.80547	-0.189291	255.98	0.00225344	0.288478	5348.36	0.44829
material101	5	620.646	1.2704e+06	5517.39	850.446	58.0955	0.872113	3.99459	5.55015	0.00274883	9.71327	0.292467	0.207469	-0.230804	0.959528	0.985778	0.922844	0.203015	0.0174434	41.1124	6.44279	2052.43	850.446	0.029807	731.602	1.45744	875.002	0.0328988	0.0157687	0.776499	0.902379	0.941402	700.911	0.014186	658.173	1.95531	64	20.4449	17.2191	2.43042	15.5015	0.273759	1.86062	0.407182	240.297	0.003244	0.321468	5038.8	0.38959
[truncated: 1 more columns]

## Sheet: BedTime_FixBinSize
ROI	BedTime(min)	-333-1AutoCorrelation	-333-1ClusterProminence	-333-1ClusterShade	-333-1ClusterTendendcy	-333-1Contrast	-333-1Correlation	-333-1DifferenceEntropy	-333-1Dissimilarity	-333-1Energy	-333-1Entropy	-333-1Homogeneity	-333-1Homogeneity2	-333-1InformationMeasureCorr1	-333-1InformationMeasureCorr2	-333-1InverseDiffMomentNorm	-333-1InverseDiffNorm	-333-1InverseVariance	-333-1MaxProbability	-333-1SumAverage	-333-1SumEntropy	-333-1SumVariance	-333-1Variance	-333GrayLevelNonuniformity	-333HighGrayLevelRunEmpha	-333LongRunEmphasis	-333LongRunHighGrayLevelEmpha	-333LongRunLowGrayLevelEmpha	-333LowGrayLevelRunEmpha	-333RunLengthNonuniformity	-333RunPercentage	-333ShortRunEmphasis	-333ShortRunHighGrayLevelEmpha	-333ShortRunLowGrayLevelEmpha	EnergyNorm	GlobalEntropy	GlobalMax	GlobalMean	GlobalMedian	GlobalMin	GlobalStd	GlobalUniformity	Kurtosis	Skewness	Variance	Busyness	Coarseness	Complexity	Contrast
material11	2	269.568	330410	4304.76	395.279	27.7143	0.868962	3.31595	3.28391	0.00617371	8.69071	0.452679	0.390332	-0.247468	0.956079	0.982867	0.928255	0.30584	0.0352636	26.6591	5.93368	824.822	395.279	0.046061	93.3011	4.53452	281.129	0.480029	0.0658336	0.344893	0.624791	0.771092	74.4272	0.0459212	65.9092	0.942968	19	6.24923	5.00049	0.500977	5.18286	0.539008	2.19982	0.649579	26.862	0.0146559	1.36332	112.01	0.104865
material21	2	400.073	273644	-365.914	380.779	38.2125	0.8176	3.70867	4.44377	0.00212924	9.46769	0.337889	0.255372	-0.170038	0.909891	0.977229	0.905566	0.237356	0.0155239	35.4644	6.12904	1241.35	380.779	0.0444634	124.423	2.38736	266.213	0.157351	0.0421099	0.509527	0.761523	0.844295	105.081	0.0323912	98.8892	0.998907	19.5	8.40963	8.49792	0.499878	5.30774	0.500757	1.78958	0.0496913	28.1721	0.00972077	1.03432	126.27	0.144932
material31	2	456.474	209077	-1188.74	283.625	46.8906	0.716262	3.84308	4.96868	0.00204316	9.50802	0.306727	0.219432	-0.135729	0.865931	0.976102	0.90218	0.211038	0.0156225	39.8643	6.02046	1429.03	283.625	0.0501161	143.458	2.02617	256.319	0.0956871	0.0313473	0.570933	0.803844	0.867776	126.146	0.0259304	113.733	0.951068	21	9.49355	9.50024	0.502441	4.85896	0.533532	2.31539	-0.193057	23.6095	0.00715454	0.877232	187.061	0.115468
material41	2	473.476	263536	-687.829	363.356	52.4466	0.747742	3.93915	5.35085	0.00177413	9.65995	0.292591	0.205692	-0.145128	0.883054	0.972172	0.893299	0.195667	0.0160025	39.7869	6.14786	1494.94	363.356	0.0452411	149.15	2.11812	257.705	0.135456	0.0312503	0.595044	0.811356	0.879826	132.454	0.0260485	118.831	0.987729	20.5	9.50369	9.49927	0.500488	5.33998	0.508482	1.88668	-0.0415592	28.5154	0.00913616	0.841486	171.543	0.162415
material51	2	415.359	265972	505.131	368.134	45.8151	0.778644	3.81404	4.83071	0.00211391	9.53678	0.31958	0.234502	-0.165531	0.90623	0.974607	0.900976	0.219865	0.0196503	36.594	6.15662	1294.57	368.134	0.0440011	135.145	2.30888	239.977	0.152824	0.0353901	0.544843	0.783565	0.859382	118.645	0.0283106	104.178	0.999919	20	8.73578	8.50098	0.498047	5.27901	0.500056	1.91558	0.130588	27.868	0.0104629	0.933988	154.423	0.143661
material61	2	370.894	197487	1072.3	298.223	41.5753	0.755294	3.74903	4.56192	0.00313618	9.256	0.338618	0.257022	-0.169876	0.905901	0.976722	0.905895	0.234926	0.0208886	35.0275	6.0128	1140.08	298.223	0.0467939	124.967	2.63097	235.118	0.135438	0.0363811	0.516424	0.757136	0.851233	109.72	0.0295717	92.7134	0.995976	20	8.334	7.5	0.498047	4.82301	0.502787	2.16038	0.22144	23.2614	0.010741	0.986541	152.076	0.113719
material71	2	419.783	183840	-382.466	282.179	40.9118	0.746749	3.75992	4.65187	0.00233834	9.34401	0.324605	0.240695	-0.15875	0.894663	0.975746	0.901504	0.227012	0.0131405	37.9192	6.019	1299.8	282.179	0.0484686	133.197	2.27061	261.602	0.0886678	0.0335685	0.547391	0.782374	0.861409	115.004	0.0288869	104.906	0.990572	19.5	9.07693	8.9978	0.499878	4.74544	0.506521	2.17925	-0.0623761	22.5192	0.0095958	0.96547	133.863	0.125671
material81	2	473.043	242573	-2424.72	311.914	36.2336	0.79185	3.7021	4.53129	0.00210985	9.3098	0.313077	0.224492	-0.161218	0.897003	0.979074	0.904743	0.217173	0.0118171	40.2056	6.01455	1480.94	311.914	0.0518405	142.663	2.00947	275.148	0.0967348	0.0365956	0.572784	0.805422	0.868332	123.174	0.0311659	116.381	0.933889	20	9.5673	10	0.498047	4.98525	0.545121	2.18723	-0.349579	24.8527	0.00614675	1.03276	148.341	0.116052
material91	2	354.215	200071	-1891.51	315.554	23.8431	0.859498	3.42527	3.69774	0.003474	8.88125	0.346545	0.258235	-0.199534	0.927558	0.984411	0.916257	0.246231	0.025059	33.5433	5.8785	1080.89	315.554	0.0552312	110.4	2.3133	217.891	0.189943	0.0486413	0.503667	0.767842	0.837354	92.9465	0.0368586	85.5955	0.983062	19	7.8828	8.99902	0.500977	4.84391	0.511695	1.80814	-0.183184	23.4635	0.0056538	1.32226	106.853	0.0931417
material101	2	204.154	127902	955.673	269.595	18.5824	0.871035	3.24135	3.13617	0.00754075	8.27927	0.394042	0.313819	-0.232746	0.941837	0.98572	0.922812	0.286745	0.0472203	23.7824	5.61986	599.474	269.595	0.0612728	71.5794	3.03559	146.763	0.375552	0.0696076	0.415587	0.703203	0.797276	60.6816	0.0446191	48.6802	0.915264	17.5	5.47191	4.4989	0.499878	4.32987	0.557576	1.85876	0.39437	18.7478	0.00875509	1.63587	71.1355	0.0740231
material11	3	271.14	335157	4347.55	397.882	27.7671	0.869531	3.31553	3.28426	0.00623933	8.6773	0.454054	0.392065	-0.249966	0.957171	0.982829	0.928276	0.305382	0.0370203	26.7291	5.93465	830.29	397.882	0.0461943	93.1044	4.6531	288.467	0.496221	0.0661007	0.347483	0.623637	0.774393	73.973	0.0466912	66.272	0.941197	19	6.26474	5.00049	0.500977	5.1991	0.540202	2.19959	0.648957	27.0306	0.0146703	1.36629	111.764	0.105175
material21	3	400.256	273068	-370.632	379.883	37.9044	0.818549	3.69893	4.41482	0.00214893	9.45887	0.339885	0.258074	-0.171323	0.911099	0.977407	0.906155	0.242424	0.0154758	35.483	6.12797	1241.6	379.883	0.044421	124.58	2.3819	267.233	0.155233	0.041878	0.509468	0.76212	0.844016	105.629	0.0320771	98.9153	0.998707	19.5	8.41612	8.49792	0.499878	5.29991	0.500896	1.79281	0.0478519	28.089	0.00955073	1.04497	125.353	0.143377
material31	3	457.291	209818	-1223.48	285.11	46.8127	0.717934	3.84297	4.96906	0.0020071	9.51739	0.306549	0.219192	-0.135191	0.865258	0.975071	0.900156	0.21023	0.0146924	39.8857	6.0256	1431.61	285.11	0.0497788	143.58	2.06398	262.216	0.0960135	0.031479	0.564652	0.799289	0.865614	125.882	0.0260458	113.967	0.951904	20.5	9.50244	9.49927	0.500488	4.86564	0.532966	2.30114	-0.197091	23.6744	0.00810656	0.879897	162.871	0.127468
material41	3	473.9	265704	-687.711	365.17	52.3965	0.749045	3.93861	5.34917	0.00180309	9.65673	0.29297	0.206372	-0.14546	0.883448	0.972187	0.893326	0.196978	0.0169656	39.7848	6.14754	1496.63	365.17	0.0452725	148.629	2.09137	256.409	0.134392	0.0312877	0.594385	0.812426	0.878979	131.646	0.0259073	118.913	0.98824	20.5	9.50236	9.49927	0.500488	5.34997	0.508129	1.88248	-0.0401987	28.6222	0.0091355	0.844187	171.259	0.162644
material51	3	415.383	267982	514.313	368.978	45.798	0.779168	3.81155	4.82826	0.00215967	9.53238	0.319045	0.233928	-0.166971	0.907739	0.975723	0.903037	0.221272	0.020739	36.5835	6.15758	1294.71	368.978	0.0441961	135.592	2.22846	234.526	0.141789	0.0354998	0.554549	0.788416	0.863617	120.007	0.0283275	104.111	0.999907	20.5	8.72798	8.49829	0.500488	5.28559	0.500065	1.91973	0.132602	27.9374	0.0105656	0.936482	154.091	0.143359
material61	3	371.469	194850	1051.99	296.144	41.4956	0.754202	3.747	4.55438	0.00310438	9.25606	0.339299	0.257969	-0.169584	0.905581	0.976762	0.906049	0.236548	0.0199668	35.0889	6.01315	1141.54	296.144	0.0468677	124.709	2.57588	234.076	0.134012	0.0362418	0.513234	0.75684	0.84911	108.976	0.0296674	92.9256	0.996223	20	8.35559	7.99805	0.498047	4.80762	0.502616	2.1596	0.215359	23.1132	0.0107066	0.987521	152.179	0.113195
material71	3	418.896	181910	-397.95	280.537	40.7356	0.746412	3.75855	4.6356	0.00239424	9.32434	0.327185	0.243435	-0.160778	0.896758	0.975852	0.901833	0.224171	0.013099	37.8917	6.01321	1296.78	280.537	0.0481448	133.602	2.36583	265.728	0.0916823	0.0337446	0.540705	0.777198	0.859251	115.284	0.0290062	104.623	0.990431	19.5	9.06641	8.9978	0.499878	4.73578	0.506618	2.17921	-0.066295	22.4276	0.009473	0.96693	134.097	0.124573
material81	3	471.962	240769	-2412.08	310.56	36.2037	0.791192	3.70168	4.52942	0.00210065	9.31357	0.312939	0.224174	-0.160465	0.89617	0.978084	0.902715	0.216708	0.0119275	40.1683	6.01192	1477.22	310.56	0.0521456	142.542	2.00199	271.775	0.097136	0.0365205	0.579573	0.808032	0.871546	123.695	0.0310932	116.09	0.935495	19.5	9.55555	10.0023	0.499878	4.9786	0.544041	2.1867	-0.350286	24.7865	0.00693846	1.03438	129.449	0.127988
material91	3	354.242	199684	-1885.92	315.697	23.723	0.860215	3.42016	3.68648	0.00343703	8.8739	0.346806	0.258799	-0.200168	0.927959	0.984489	0.916486	0.249522	0.0221682	33.5409	5.8778	1080.95	315.697	0.0550929	110.384	2.32668	219.74	0.190487	0.0484285	0.501187	0.76674	0.836	92.7584	0.0364243	85.6509	0.983428	19	7.88791	8.99902	0.500977	4.84131	0.511443	1.80485	-0.184172	23.4383	0.00564551	1.32644	106.603	0.0928446
material101	3	202.23	127944	1007.59	268.668	18.4848	0.871255	3.24218	3.12298	0.00774569	8.26774	0.397514	0.317317	-0.234054	0.942479	0.985789	0.92313	0.280881	0.049877	23.6376	5.61982	593.309	268.668	0.0606844	71.7973	3.07944	145.353	0.38388	0.0695738	0.40899	0.699302	0.793265	61.1452	0.0439914	48.2305	0.905871	17.5	5.43862	4.4989	0.499878	4.31986	0.563814	1.87556	0.407243	18.6612	0.00894335	1.65179	70.2271	0.0729933
material11	4	270.986	337332	4394.21	398.384	27.723	0.869878	3.31611	3.28259	0.00627742	8.6825	0.454854	0.392919	-0.248916	0.95671	0.982848	0.928305	0.303941	0.0361833	26.7074	5.93481	829.883	398.384	0.0462203	92.6538	4.65916	291.81	0.498772	0.0662366	0.346063	0.622853	0.773387	73.5069	0.0467654	66.2339	0.941523	19	6.26011	5.00049	0.500977	5.20102	0.539983	2.20932	0.653657	27.0506	0.0151869	1.37192	111.145	0.104895
material21	4	399.468	270392	-399.584	377.534	37.6298	0.818725	3.69502	4.40204	0.00214491	9.45247	0.339486	0.25725	-0.171903	0.911603	0.977557	0.906359	0.241537	0.0152558	35.4679	6.12606	1238.48	377.534	0.0445376	124.098	2.40655	270.529	0.156525	0.0419366	0.50886	0.76097	0.844109	104.999	0.0321997	98.6734	0.998654	19.5	8.41055	8.49792	0.499878	5.28591	0.500933	1.79546	0.0434054	27.9409	0.00951386	1.04819	124.791	0.142259
material31	4	457.381	209354	-1207.94	284.86	46.6303	0.718666	3.84071	4.96158	0.00201777	9.51138	0.306793	0.219474	-0.135837	0.866156	0.976214	0.902257	0.210437	0.0149784	39.891	6.02577	1431.72	284.86	0.0497054	143.222	2.05875	263.654	0.0947866	0.0315364	0.562149	0.798744	0.864225	125.224	0.0261469	113.968	0.951226	21	9.50364	9.50024	0.502441	4.86337	0.533425	2.30155	-0.196943	23.6524	0.00710209	0.883208	186.012	0.115156
material41	4	473.325	267579	-692.638	366.879	52.2644	0.75062	3.9383	5.33946	0.00182549	9.65198	0.294082	0.20739	-0.146362	0.88462	0.972253	0.893506	0.195041	0.0178745	39.7327	6.14697	1494.88	366.879	0.0451352	148.692	2.11994	259.029	0.137376	0.0313772	0.590837	0.80992	0.877847	131.617	0.0259275	118.772	0.988213	20.5	9.49064	9.49927	0.500488	5.35759	0.508148	1.87836	-0.0382368	28.7038	0.0090768	0.845775	171.121	0.162726
material51	4	416.409	264368	511.538	366.867	45.8577	0.777782	3.81119	4.83467	0.00209649	9.53485	0.317793	0.23261	-0.16632	0.907045	0.974586	0.900893	0.222873	0.019142	36.6691	6.15607	1297.91	366.867	0.0442293	135.983	2.19731	231.743	0.133967	0.0353673	0.557732	0.790294	0.864886	120.595	0.0282314	104.281	0.999921	20	8.7427	8.50098	0.498047	5.27737	0.500055	1.91564	0.13077	27.8506	0.0105004	0.93704	154.19	0.142842
material61	4	371.152	193417	1059.18	295.175	41.5127	0.753406	3.74838	4.55499	0.00316906	9.24681	0.340032	0.25875	-0.170347	0.906251	0.976754	0.906041	0.234851	0.0222628	35.0848	6.0086	1140.6	295.175	0.0467561	124.5	2.62554	237.645	0.132213	0.036332	0.508361	0.753184	0.847283	108.195	0.0297114	92.8142	0.996271	20	8.3518	7.99805	0.498047	4.80264	0.502582	2.16017	0.217017	23.0653	0.0105972	0.988635	152.062	0.112869
material71	4	418.535	182718	-365.302	280.585	40.6623	0.746848	3.75758	4.63223	0.002448	9.31941	0.327442	0.243778	-0.160965	0.896892	0.975881	0.901893	0.224731	0.0159701	37.8711	6.0129	1295.53	280.585	0.0481597	133.455	2.35067	266.285	0.0909199	0.0336848	0.5407	0.777112	0.859277	115.25	0.0290139	104.557	0.990832	19.5	9.06372	8.9978	0.499878	4.73393	0.506341	2.18704	-0.0615078	22.4101	0.00950276	0.965499	134.189	0.124668
material81	4	471.935	241406	-2399.94	311.008	36.1066	0.791962	3.6988	4.52412	0.00210144	9.31543	0.312525	0.223918	-0.160741	0.896538	0.978141	0.902804	0.219262	0.0121382	40.1602	6.01376	1476.99	311.008	0.0519632	142.451	2.00872	275.684	0.0969414	0.036529	0.574895	0.806086	0.869382	123.377	0.0310349	116.108	0.936087	19.5	9.55636	10.0023	0.499878	4.97884	0.543643	2.18892	-0.348417	24.7888	0.0069675	1.03554	128.966	0.127763
material91	4	354.131	198247	-1898.23	314.4	23.5873	0.860425	3.41414	3.67357	0.00341451	8.87299	0.347116	0.259527	-0.200758	0.928412	0.984573	0.916754	0.25406	0.0218209	33.5516	5.87499	1080.4	314.4	0.0551531	109.707	2.32392	220.148	0.188587	0.04898	0.498569	0.765638	0.834558	91.7316	0.0372283	85.5278	0.982939	19	7.88337	8.99902	0.500977	4.83598	0.511779	1.80356	-0.187248	23.3867	0.00563742	1.32825	106.777	0.0926762
material101	4	202.007	127253	991.967	269.022	18.3598	0.872227	3.23869	3.10833	0.00793242	8.24571	0.399963	0.320082	-0.236362	0.94357	0.98588	0.923472	0.279707	0.0518508	23.6086	5.61333	592.851	269.022	0.0607886	72.0078	3.08009	144.481	0.38723	0.069459	0.408355	0.699554	0.792472	61.385	0.0434685	48.1228	0.908937	17.5	5.42728	4.4989	0.499878	4.32165	0.56178	1.86379	0.404893	18.6767	0.00879969	1.6587	70.3536	0.0724168
material11	5	270.986	333590	4328.72	396.869	27.7546	0.869275	3.31678	3.28223	0.00620183	8.6818	0.455358	0.393225	-0.248921	0.956705	0.98283	0.928327	0.301721	0.0358433	26.7363	5.93483	829.569	396.869	0.0462144	93.468	4.61684	284.357	0.486643	0.0662798	0.344231	0.622772	0.77152	74.189	0.0467485	66.2062	0.942188	19	6.26416	5.00049	0.500977	5.19348	0.539534	2.20079	0.648848	26.9722	0.0146721	1.36988	111.549	0.104609
material21	5	399.19	270593	-374.203	377.602	37.6784	0.818541	3.69575	4.40263	0.00214258	9.4531	0.339858	0.257716	-0.171286	0.910962	0.977533	0.906363	0.241485	0.0149375	35.4519	6.12599	1237.61	377.602	0.044495	123.887	2.43905	276.255	0.159019	0.0419672	0.508387	0.759481	0.844439	105.007	0.0322656	98.6716	0.998726	19.5	8.41119	8.49792	0.499878	5.28472	0.500883	1.79723	0.0454157	27.9283	0.00959414	1.04654	124.949	0.142519
material31	5	457.919	210616	-1210.47	285.774	46.634	0.719421	3.8414	4.96538	0.00201762	9.51565	0.306432	0.219131	-0.135667	0.865978	0.976203	0.902176	0.210707	0.0153736	39.9066	6.02734	1433.58	285.774	0.0495041	143.749	2.06328	262.187	0.0959679	0.0315305	0.562386	0.798608	0.864436	125.813	0.0261037	114.075	0.950517	21	9.5056	9.50024	0.502441	4.87056	0.533905	2.30006	-0.195695	23.7224	0.00709899	0.884849	185.573	0.115192
material41	5	475.074	266269	-684.171	366.138	52.4123	0.74956	3.94013	5.35424	0.00178515	9.6594	0.292718	0.205993	-0.145674	0.883803	0.972171	0.893216	0.195628	0.0167392	39.8318	6.14889	1500.68	366.138	0.0450471	149.232	2.10663	258.967	0.132944	0.0312762	0.593381	0.811264	0.878867	132.271	0.0259213	119.182	0.987903	20.5	9.51291	9.49927	0.500488	5.35641	0.508362	1.8783	-0.0394364	28.6911	0.00905457	0.843874	171.417	0.163067
material51	5	416.861	265329	521.73	367.67	45.8457	0.778264	3.81337	4.8383	0.00209479	9.53878	0.318199	0.233093	-0.1654	0.906097	0.974573	0.900812	0.221682	0.019098	36.6827	6.15714	1299.48	367.67	0.0441866	135.901	2.19681	232.805	0.134092	0.0355645	0.554418	0.789403	0.863122	120.278	0.0283249	104.332	0.999927	20	8.7414	8.50098	0.498047	5.28436	0.50005	1.91455	0.131634	27.9245	0.010508	0.937912	154.202	0.143146
material61	5	371.669	191835	1060.51	294.104	41.4624	0.752882	3.74722	4.54874	0.00317395	9.24651	0.340906	0.259733	-0.170577	0.90649	0.976781	0.906173	0.234732	0.0214155	35.1288	6.00702	1142.18	294.104	0.0467897	125.099	2.60936	235.017	0.131018	0.0362979	0.513016	0.755194	0.849644	109.309	0.0298948	92.8963	0.99657	20	8.35931	7.99805	0.498047	4.7981	0.502376	2.15975	0.215639	23.0218	0.0104908	0.988885	152.18	0.112447
material71	5	419.65	181586	-374.796	279.79	40.5222	0.746984	3.75557	4.62273	0.00243527	9.32237	0.32833	0.244672	-0.161272	0.897316	0.977041	0.904125	0.223815	0.0155272	37.9385	6.01232	1299.07	279.79	0.0481101	133.76	2.4009	271.99	0.092443	0.0333464	0.538362	0.774721	0.858772	115.392	0.0287571	104.892	0.989986	20	9.0877	8.99902	0.498047	4.72326	0.506925	2.19009	-0.0656157	22.3092	0.00815575	0.968231	153.948	0.111996
material81	5	472.522	241720	-2383.19	311.378	36.124	0.792094	3.69871	4.52772	0.00209618	9.31645	0.312253	0.22372	-0.160763	0.896588	0.978123	0.902726	0.219838	0.0118732	40.185	6.01674	1478.85	311.378	0.0522	142.479	1.96059	266.126	0.0959527	0.0364204	0.580537	0.810303	0.87119	123.45	0.0310156	116.248	0.936616	19.5	9.56209	10.0023	0.499878	4.98193	0.543287	2.18872	-0.346244	24.8197	0.00697426	1.03485	129.195	0.128011
material91	5	353.704	197898	-1884.98	313.806	23.5717	0.860265	3.41762	3.67212	0.00342529	8.86902	0.348592	0.260819	-0.200588	0.928212	0.984579	0.916788	0.249217	0.0227876	33.5348	5.87577	1078.83	313.806	0.0553124	110.261	2.30631	219.567	0.186318	0.048427	0.507835	0.769316	0.839741	93.2681	0.0367182	85.5112	0.98283	19	7.88664	8.99902	0.500977	4.82893	0.511854	1.81013	-0.187681	23.3186	0.00564247	1.32878	106.652	0.0922417
material101	5	203.869	129212	989.679	271.163	18.5871	0.871703	3.24492	3.12865	0.00784705	8.2685	0.398205	0.318457	-0.234397	0.942703	0.985712	0.923032	0.281674	0.0512401	23.7255	5.62047	598.956	271.163	0.0610358	72.0287	3.05907	144.691	0.383046	0.0699297	0.409466	0.700446	0.793095	61.2319	0.0442169	48.4841	0.909814	17.5	5.44517	4.4989	0.499878	4.34091	0.561198	1.86261	0.404858	18.8435	0.00877238	1.65716	70.444	0.0733758
[truncated: 1 more columns]

## Sheet: FilterCutoff_64Levels
ROI	Cutoff(mm)	-333-1AutoCorrelation	-333-1ClusterProminence	-333-1ClusterShade	-333-1ClusterTendendcy	-333-1Contrast	-333-1Correlation	-333-1DifferenceEntropy	-333-1Dissimilarity	-333-1Energy	-333-1Entropy	-333-1Homogeneity	-333-1Homogeneity2	-333-1InformationMeasureCorr1	-333-1InformationMeasureCorr2	-333-1InverseDiffMomentNorm	-333-1InverseDiffNorm	-333-1InverseVariance	-333-1MaxProbability	-333-1SumAverage	-333-1SumEntropy	-333-1SumVariance	-333-1Variance	-333GrayLevelNonuniformity	-333HighGrayLevelRunEmpha	-333LongRunEmphasis	-333LongRunHighGrayLevelEmpha	-333LongRunLowGrayLevelEmpha	-333LowGrayLevelRunEmpha	-333RunLengthNonuniformity	-333RunPercentage	-333ShortRunEmphasis	-333ShortRunHighGrayLevelEmpha	-333ShortRunLowGrayLevelEmpha	EnergyNorm	GlobalEntropy	GlobalMax	GlobalMean	GlobalMedian	GlobalMin	GlobalStd	GlobalUniformity	Kurtosis	Skewness	Variance	Busyness	Coarseness	Complexity	Contrast
material11	8	643.378	1.85591e+06	15243.2	893.748	45.8714	0.902362	3.73688	4.5109	0.00230024	9.85824	0.371492	0.298445	-0.253617	0.971065	0.988777	0.936996	0.258675	0.018508	41.5408	6.63001	2112.51	893.748	0.0205317	772.738	1.87199	1208.2	0.031546	0.0123993	0.646599	0.834529	0.900128	705.536	0.0106654	697.358	2.03439	64	21.274	17.5344	2.4458	15.6468	0.263427	2.34867	0.628868	244.822	0.00438934	0.381898	4472.12	0.322812
material21	8	1039.57	1.76371e+06	-3267.81	957.797	63.4504	0.87574	4.06622	5.87591	0.000930658	10.516	0.279075	0.193429	-0.197326	0.948669	0.984476	0.918691	0.190797	0.00628958	57.1308	6.80174	3490.81	957.797	0.017056	1181.29	1.38904	1596.72	0.0139759	0.00809432	0.767458	0.905009	0.936408	1101.35	0.00747956	1120.72	2.12618	64	29.0065	30.4543	2.39966	16.7149	0.24261	1.8266	-0.0471758	279.386	0.00237328	0.325854	4352.04	0.428762
material31	8	1096.91	1.12765e+06	-7982.99	636.618	69.085	0.804236	4.11549	6.10204	0.00115511	10.3085	0.272046	0.185633	-0.163958	0.917395	0.983228	0.916079	0.18188	0.00669746	61.807	6.57057	3687.69	636.618	0.0205477	1259.07	1.35043	1614.98	0.0119253	0.0063834	0.784903	0.913241	0.941684	1189	0.00574442	1183.25	1.89578	64	31.2374	33.2075	2.32275	14.405	0.311518	2.45843	-0.44896	207.503	0.00183297	0.296667	5018.13	0.347018
material41	8	1153.49	1.39482e+06	-5087.71	810.929	83.8051	0.812682	4.27824	6.97227	0.000850639	10.5953	0.242007	0.155996	-0.16537	0.923061	0.979715	0.905038	0.153988	0.00783723	62.3446	6.74572	3902.17	810.929	0.0175268	1325.78	1.27485	1608.28	0.010679	0.00604623	0.825192	0.930804	0.953646	1269.48	0.00544968	1249.42	2.06246	64	31.5715	32.077	2.32275	15.8964	0.26024	1.9932	-0.19082	252.697	0.00228562	0.276002	5231.07	0.457522
material51	8	1035.58	1.44956e+06	-988.606	852.088	77.1761	0.833899	4.19934	6.48342	0.000959056	10.5534	0.261293	0.17497	-0.180773	0.936616	0.981385	0.911482	0.170825	0.010648	58.0292	6.77244	3479.34	852.088	0.0172242	1206.82	1.31404	1468.16	0.0125476	0.00683502	0.806839	0.9224	0.948413	1152.49	0.00614157	1126.68	2.07202	64	29.4958	29.1777	2.33813	16.0223	0.254534	1.93008	-0.00702823	256.714	0.00261541	0.295982	4812.91	0.431669
material61	8	969.326	1.21221e+06	940.73	730.719	71.2988	0.822204	4.13757	6.16231	0.00115611	10.3824	0.276298	0.191834	-0.187755	0.940083	0.982731	0.91552	0.186762	0.00609246	56.7264	6.69499	3233.86	730.719	0.0181323	1141.35	1.40466	1458.38	0.0117187	0.00665824	0.769844	0.903896	0.937784	1079.77	0.0061231	1057.57	2.03603	64	28.8688	27.9934	2.38428	14.9732	0.263893	2.18614	0.0429954	224.195	0.00275813	0.307628	4661.1	0.366763
material71	8	1121.85	1.34961e+06	-5358.03	754.472	70.4216	0.829259	4.14663	6.23132	0.00102575	10.4096	0.272117	0.187771	-0.186913	0.939744	0.982845	0.914337	0.179585	0.00568207	61.6714	6.70714	3775.54	754.472	0.0182049	1286.12	1.41032	1736.51	0.0108345	0.00636644	0.765085	0.902506	0.936103	1202.29	0.00595456	1214.06	2.04625	64	31.2893	32.5615	2.39966	15.3321	0.267432	2.21799	-0.237529	235.073	0.00215211	0.304756	4666.83	0.389005
material81	8	1225.5	1.73305e+06	-12925.4	844.101	61.2512	0.864692	4.06386	5.95059	0.00104167	10.3239	0.267026	0.179152	-0.193613	0.94376	0.984884	0.917188	0.176375	0.00457908	64.1806	6.68248	4150.14	844.101	0.0196124	1368.93	1.29501	1776.31	0.0108119	0.00721902	0.801175	0.922516	0.945946	1288.81	0.00677434	1308.35	2.02752	64	32.3759	35.4608	2.38428	16.1307	0.276245	2.17223	-0.445007	260.201	0.0017093	0.32436	4541.69	0.404944
material91	8	988.771	1.59789e+06	-9537.75	931.038	39.8709	0.917869	3.77415	4.84989	0.00158948	9.90742	0.295089	0.205414	-0.241511	0.96655	0.989974	0.930657	0.204655	0.0106681	55.3527	6.6051	3307.36	931.038	0.0218956	1105.27	1.37842	1458.68	0.018413	0.00959411	0.776379	0.908658	0.93926	1031.26	0.00873313	1045.98	2.0206	64	27.87	32.3308	2.46118	16.4107	0.258627	1.69582	-0.222619	269.313	0.0015107	0.400667	3949.11	0.339351
material101	8	752.644	1.71301e+06	6912.72	1027.25	41.368	0.922576	3.79252	4.84617	0.00239239	9.67861	0.302885	0.214021	-0.265308	0.973764	0.989637	0.930981	0.204148	0.0140608	44.9966	6.55714	2504.84	1027.25	0.0263747	861.397	1.42547	1113.03	0.0241565	0.0126313	0.767713	0.901199	0.937632	811.761	0.0113604	797.183	2.04357	64	22.7576	19.4417	2.75342	16.7152	0.250361	1.67234	0.334423	279.399	0.00225982	0.422285	3810.72	0.344566
material11	3	643.466	2.13556e+06	17779.4	1030.65	87.4508	0.843572	3.95613	5.59062	0.00397608	9.78044	0.380977	0.316156	-0.233481	0.961585	0.980342	0.926636	0.262408	0.0306799	40.3815	6.5297	2176.59	1030.65	0.023445	817.26	2.04122	1101.65	0.0561762	0.018535	0.627882	0.82114	0.895009	765.252	0.0157781	696.624	2.01886	64	20.1877	14.3813	2.15356	17.0042	0.26811	2.15699	0.680984	289.144	0.0057223	0.265245	6544.16	0.549447
material21	3	900.458	1.57121e+06	85.9925	912.62	117.988	0.771033	4.447	7.65547	0.000960042	10.7528	0.260104	0.180796	-0.14839	0.906401	0.972934	0.899643	0.174604	0.00755301	52.983	6.75605	3049.55	912.62	0.0177184	1067.27	1.37039	1317.62	0.0198003	0.0108711	0.783651	0.910349	0.941898	1015.22	0.00985608	987.178	2.10362	64	26.5426	26.4861	2.18433	16.8142	0.242052	1.80564	0.127605	282.719	0.0043108	0.21063	6912.3	0.671733
material31	3	839.804	761167	-620.779	552.928	120.37	0.642447	4.48006	7.88649	0.000916328	10.6107	0.239052	0.155934	-0.114267	0.850702	0.97246	0.896372	0.153868	0.00590275	54.0986	6.52784	2815.9	552.928	0.0201875	1007.08	1.25559	1184.5	0.0130396	0.00831367	0.822468	0.931311	0.952347	968.656	0.00766874	933.686	1.92626	64	27.1674	26.8552	2.07666	13.9874	0.285436	2.28307	0.00130314	195.647	0.00407573	0.199988	6857.84	0.51561
material41	3	943.537	1.12241e+06	-151.485	758.737	140.381	0.687735	4.59994	8.58385	0.000826686	10.793	0.231905	0.152107	-0.127505	0.877591	0.968282	0.888671	0.14508	0.00754596	56.1764	6.68185	3208.45	758.737	0.0174526	1129.3	1.2939	1343.97	0.0162075	0.00824088	0.808272	0.924314	0.94846	1083.57	0.00739893	1047.49	2.02638	64	28.1862	27.3474	2.10742	15.908	0.262556	1.86697	0.0675933	253.064	0.00411515	0.190871	7617.14	0.657667
material51	3	852.628	1.23071e+06	3390.39	786.529	125.904	0.724038	4.47588	7.84066	0.000967599	10.6914	0.252189	0.171585	-0.150334	0.907928	0.971636	0.897811	0.168436	0.00911097	52.4394	6.71185	2877.54	786.529	0.0174066	1036.74	1.30896	1203.29	0.0173907	0.00906196	0.799668	0.920914	0.945808	1000.15	0.00808309	948.681	2.04285	64	26.4072	24.625	2.1228	15.855	0.262226	1.96073	0.233115	251.38	0.00499746	0.203958	7057.33	0.61725
material61	3	777.289	988946	5276.29	665.791	119.375	0.695925	4.42914	7.53425	0.00174677	10.368	0.275277	0.198859	-0.154299	0.907381	0.972987	0.901599	0.180955	0.0148202	50.6235	6.56329	2607.09	665.791	0.0196761	963.947	1.47258	1172.28	0.0196826	0.00948731	0.756014	0.895522	0.934207	924.036	0.00856709	865.964	1.95467	64	25.4166	22.7793	2.15356	14.8323	0.285143	2.19963	0.341554	219.996	0.00489749	0.208422	7229.1	0.527017
material71	3	899.807	930532	801.73	636.733	122.327	0.677694	4.49095	7.90677	0.00125604	10.5231	0.25346	0.174887	-0.141373	0.893522	0.972026	0.896409	0.161624	0.011331	55.5412	6.59095	3032.86	636.733	0.0190823	1079.94	1.33171	1311.33	0.0126297	0.00833037	0.790749	0.915984	0.943358	1030.8	0.007807	997.865	2.01221	64	27.9437	26.8552	2.15356	14.7327	0.268894	2.18141	0.0767604	217.054	0.00421839	0.200425	7293.86	0.541718
material81	3	1049.14	1.20603e+06	-5995.56	694.671	111.974	0.72237	4.46836	7.91316	0.000841008	10.6409	0.227668	0.143918	-0.132392	0.882512	0.973772	0.894846	0.143871	0.0047818	60.1155	6.63334	3555.02	694.671	0.0197294	1201.74	1.18279	1401.35	0.0125737	0.0091914	0.858087	0.947249	0.962269	1156.91	0.00869372	1137.15	2.01555	64	29.9776	31.2157	2.16895	15.4448	0.273472	2.17585	-0.236202	238.541	0.0033664	0.207703	6786.59	0.5925
material91	3	907.128	1.41229e+06	-6612.98	816.276	90.7161	0.799963	4.32354	7.10718	0.00125911	10.3959	0.244888	0.159827	-0.166067	0.920799	0.978382	0.903976	0.156213	0.0107568	53.879	6.6079	3050.84	816.276	0.0219695	1045.39	1.27362	1206.21	0.0220247	0.0124545	0.837487	0.933859	0.9579	1009.47	0.0116433	969.44	2.02758	64	26.6612	28.947	2.24585	16.0839	0.264722	1.88599	-0.0954475	258.693	0.00313541	0.229417	6521.09	0.566957
material101	3	530.769	1.09334e+06	6026.39	748.173	73.7156	0.820619	4.12579	6.05453	0.00339924	9.65573	0.293235	0.211736	-0.215099	0.949971	0.982382	0.91753	0.20114	0.0226337	38.0607	6.35106	1753.67	748.173	0.0311411	634.122	1.43083	753.785	0.0384791	0.0202778	0.786181	0.905935	0.944418	609.033	0.0184402	569.016	1.87665	64	18.7556	15.658	2.23047	14.7431	0.294293	2.13653	0.526264	217.359	0.00439443	0.271351	5864.71	0.431306
material11	1	603.73	1.94039e+06	16749.5	1000.93	84.0071	0.84514	3.90669	5.4183	0.00518719	9.58593	0.394326	0.3312	-0.237708	0.961613	0.981056	0.928798	0.26413	0.0353832	38.704	6.43242	2042.38	1000.93	0.0253425	771.58	2.14908	1059.86	0.0723253	0.0209959	0.607428	0.808061	0.888138	717.899	0.0173764	651.178	1.95723	64	19.255	13.3354	2.0459	16.7477	0.282101	2.10548	0.685975	280.487	0.00572396	0.270276	6101.15	0.558267
material21	1	827.629	1.39779e+06	643.268	861.344	113.895	0.766427	4.42171	7.50586	0.00111678	10.6617	0.265581	0.186615	-0.147476	0.903813	0.973767	0.901345	0.176961	0.0117269	50.6267	6.70031	2790.87	861.344	0.0184153	987.277	1.39348	1226.07	0.0229028	0.0122507	0.777548	0.906744	0.940337	939.238	0.0110792	908.884	2.06588	64	25.3236	25.071	2.09204	16.36	0.247186	1.80773	0.157163	267.649	0.00451819	0.212364	6784.55	0.651545
material31	1	811.421	765958	-16.5779	556.288	121.109	0.642429	4.4843	7.90886	0.000926695	10.6049	0.239487	0.157061	-0.115589	0.853141	0.972304	0.896145	0.157385	0.00622449	53.0142	6.53249	2716.84	556.288	0.0201783	978.526	1.27646	1151.75	0.0147895	0.00877551	0.817278	0.928338	0.951067	943.132	0.00796737	902.251	1.93282	64	26.5675	26.1938	2.01514	14.016	0.282463	2.27378	0.0508846	196.449	0.00391355	0.198287	7554.99	0.488893
material41	1	932.998	1.14324e+06	161.663	765.981	142.262	0.686732	4.60871	8.63889	0.000836661	10.804	0.231824	0.152244	-0.127254	0.87739	0.967887	0.888114	0.145049	0.00814149	55.7519	6.68694	3173.35	765.981	0.0175205	1119.45	1.3023	1319.59	0.0186274	0.00852178	0.811462	0.925004	0.949667	1076.65	0.00765244	1035.3	2.02717	64	27.9293	26.9321	2.06128	15.978	0.262286	1.86704	0.0872162	255.296	0.00426999	0.18882	7671.59	0.668346
material51	1	820.5	1.19194e+06	3663.24	773.983	124.474	0.722927	4.46871	7.78149	0.00100768	10.6567	0.255473	0.17511	-0.151337	0.908579	0.971921	0.898518	0.16883	0.0087322	51.3078	6.69554	2764.24	773.983	0.0175669	1005.54	1.34321	1164.26	0.0198591	0.00960344	0.792064	0.916063	0.943972	971.41	0.00852951	913.384	2.02697	64	25.8086	23.9482	2.07666	15.727	0.264035	1.96678	0.254848	247.337	0.00507314	0.203698	7174.33	0.608095
material61	1	694.357	823831	4776.48	607.645	110.127	0.693143	4.37283	7.2282	0.00192382	10.2491	0.282319	0.205865	-0.153584	0.904566	0.974843	0.904952	0.187184	0.015489	47.7484	6.49292	2309.66	607.645	0.0204935	869.967	1.51837	1069.39	0.0232446	0.0103384	0.737912	0.886604	0.928603	831.68	0.00915145	774.356	1.8924	64	23.9402	21.3489	2.0459	14.1864	0.298559	2.2091	0.364428	201.253	0.00534044	0.213739	6429.19	0.517213
material71	1	835.836	824505	1080.26	599.019	118.549	0.669588	4.46561	7.77031	0.00133122	10.4511	0.256201	0.177821	-0.140376	0.890892	0.972823	0.897937	0.167069	0.011362	53.5058	6.54572	2804.27	599.019	0.0196058	1015.28	1.3649	1226.82	0.0142272	0.00881332	0.783977	0.911539	0.94178	971.129	0.00822465	929.294	1.96313	64	26.9047	25.7632	2.07666	14.3342	0.277787	2.19055	0.106186	205.468	0.0043832	0.20097	7125.52	0.527815
material81	1	997.587	1.14663e+06	-5375.61	678.113	113.067	0.714182	4.47082	7.89998	0.000883696	10.6065	0.229972	0.146521	-0.132505	0.882085	0.97363	0.895183	0.145919	0.00599692	58.5261	6.61483	3372.89	678.113	0.0201074	1150.03	1.20894	1340.28	0.0155173	0.00991842	0.851147	0.943388	0.960672	1107.26	0.00931495	1082.03	2.00961	64	29.1168	30.3082	2.10742	15.3064	0.272619	2.16264	-0.20249	234.286	0.00333687	0.204656	7240.7	0.570355
material91	1	861.388	1.3712e+06	-5483.99	801.231	94.4975	0.789004	4.34157	7.1595	0.00141134	10.3548	0.247702	0.163132	-0.165498	0.919577	0.977685	0.903715	0.158038	0.0116098	52.3337	6.58648	2894.04	801.231	0.0229825	993.486	1.2879	1157.91	0.0252683	0.0143795	0.830923	0.931615	0.955989	957.076	0.0134205	920.923	2.01365	64	25.7972	27.8704	2.16895	15.9844	0.267949	1.90652	-0.0436333	255.5	0.00334178	0.224485	6726.19	0.570546
material101	1	506.54	1.12105e+06	6895.56	739.846	77.1854	0.811059	4.13678	6.09489	0.00416019	9.5619	0.299379	0.219705	-0.216352	0.949593	0.981713	0.917432	0.207318	0.0273684	36.9256	6.31351	1676.94	739.846	0.0340273	607.966	1.43701	715.184	0.0447682	0.0233418	0.779915	0.904428	0.942257	584.765	0.021182	543.179	1.85863	64	18.0991	14.6813	2.1228	14.6873	0.302433	2.26411	0.587151	215.718	0.00473405	0.266396	6066.13	0.436011
material11	10	618.948	1.63147e+06	13156.6	824.24	35.3467	0.917759	3.61924	4.10462	0.00229396	9.75288	0.372406	0.295831	-0.264405	0.974053	0.991194	0.941542	0.257165	0.0195008	41.0719	6.60787	2012.01	824.24	0.020721	744.563	1.94916	1202.31	0.0330946	0.0107104	0.638994	0.828255	0.898206	672.127	0.00912662	674.947	1.99831	64	21.2321	18.5957	2.53809	14.9729	0.269902	2.40193	0.597584	224.187	0.00333343	0.436179	3981.81	0.258629
material21	10	1094.29	1.87096e+06	-4582.1	985.794	51.4279	0.900835	3.93085	5.35722	0.000966756	10.4097	0.288185	0.200729	-0.21813	0.960119	0.987249	0.924744	0.198895	0.00429395	58.6753	6.81105	3675.69	985.794	0.0171593	1232.77	1.41103	1715.7	0.0121901	0.00695942	0.766611	0.902712	0.936743	1143.74	0.00641437	1178.07	2.13046	64	29.9296	31.8309	2.47656	16.8026	0.243578	1.83895	-0.0955186	282.329	0.0019357	0.378882	3685.31	0.372017
material31	10	1121.29	1.1299e+06	-9729.72	625.644	52.5999	0.844919	3.92459	5.31123	0.00142429	10.0593	0.29501	0.208495	-0.187811	0.935874	0.987014	0.925655	0.207807	0.00504955	62.5469	6.51459	3765.26	625.644	0.0214807	1275.88	1.40227	1746.87	0.00938441	0.00570578	0.759536	0.902094	0.933757	1189.27	0.00523949	1207.67	1.86733	64	31.7761	34.4534	2.3689	14.0704	0.31706	2.56077	-0.571132	197.977	0.00139128	0.353083	4291.54	0.279243
material41	10	1158.65	1.46392e+06	-7214.58	811.354	64.839	0.852021	4.10403	6.15361	0.0010521	10.3892	0.259842	0.17173	-0.19175	0.943248	0.984035	0.91463	0.166832	0.012397	62.3544	6.72214	3906.3	811.354	0.017944	1316.16	1.31217	1690.01	0.0116046	0.00623236	0.80499	0.921986	0.947779	1245.12	0.0056076	1249.52	2.01636	64	31.6701	32.823	2.3689	15.7021	0.270349	2.06384	-0.274272	246.556	0.0018374	0.324583	4504.4	0.381363
material51	10	1034.87	1.40862e+06	-2810.5	832.074	60.7579	0.863901	4.04198	5.80425	0.00108058	10.3681	0.276213	0.188891	-0.201162	0.949566	0.985073	0.919356	0.185474	0.0118461	58.036	6.73887	3463.47	832.074	0.017423	1192.99	1.3718	1544.42	0.0135209	0.00684957	0.780612	0.910264	0.940661	1123.92	0.00615726	1121.14	2.02902	64	29.5648	29.8391	2.38428	15.7193	0.260127	1.94961	-0.0844387	247.096	0.00201478	0.344781	4227.68	0.356619
material61	10	959.06	1.17274e+06	-1280.11	715.383	54.9603	0.85731	3.96726	5.48064	0.00124046	10.2105	0.288083	0.201384	-0.208252	0.952308	0.986442	0.923418	0.198897	0.00719092	56.3544	6.67122	3183.8	715.383	0.0186219	1122.81	1.46624	1483.2	0.0136727	0.00650406	0.762362	0.897834	0.936359	1057.91	0.00595599	1041.75	1.99351	64	28.7495	28.6394	2.41504	14.6714	0.270849	2.18661	-0.0609533	215.249	0.00206633	0.360602	4074.5	0.299682
material71	10	1154.59	1.46743e+06	-7805.92	787.375	56.2714	0.866601	3.99915	5.62661	0.0010682	10.2842	0.283187	0.197129	-0.206907	0.952299	0.986086	0.921386	0.191021	0.00439772	62.3478	6.70694	3883.29	787.375	0.018417	1305.93	1.4665	1883.93	0.0099823	0.00622774	0.753376	0.895071	0.933144	1210.36	0.00587192	1244.75	2.02029	64	31.7107	33.6997	2.47656	15.4669	0.273897	2.20401	-0.318982	239.224	0.00170653	0.35718	4014.95	0.337846
material81	10	1264.04	1.97035e+06	-15262.4	923.708	49.181	0.898897	3.90868	5.34705	0.00119695	10.1674	0.282059	0.193696	-0.222626	0.960053	0.987727	0.924535	0.197091	0.00487099	64.6657	6.69019	4284.87	923.708	0.0197448	1396.92	1.37377	1950.01	0.0115439	0.00704653	0.777905	0.909635	0.939688	1298.22	0.00660948	1345.44	2.05559	64	32.7063	36.6451	2.46118	16.6069	0.269379	2.08413	-0.45934	275.79	0.00140852	0.379184	3896.33	0.36686
material91	10	1032.38	1.77433e+06	-9333.84	1010.42	31.8737	0.938839	3.62473	4.35875	0.00174187	9.75989	0.312175	0.221876	-0.274493	0.977336	0.991924	0.936918	0.216997	0.00882601	56.1336	6.6298	3461.04	1010.42	0.021512	1139.09	1.44291	1626.02	0.0173541	0.00896734	0.760692	0.899289	0.935181	1051.97	0.0081774	1090.74	2.04609	64	28.3762	33.1537	2.55347	16.8998	0.253244	1.629	-0.193061	285.604	0.00126918	0.474407	3344.13	0.303764
material101	10	831.122	2.18777e+06	10281.8	1160.67	35.0179	0.941426	3.68206	4.50022	0.00233986	9.66644	0.311698	0.222808	-0.287822	0.980425	0.991164	0.935272	0.218905	0.0134514	46.8917	6.62278	2782.26	1160.67	0.0235845	936.748	1.44269	1255.16	0.0208648	0.0113096	0.782699	0.904121	0.94344	874.612	0.010496	883.283	2.06478	64	23.9859	19.8723	2.99951	17.5524	0.248618	1.66355	0.356335	308.088	0.00202034	0.493462	3219.59	0.325296
material11	5	704.143	2.33617e+06	18665.7	1049.96	73.1518	0.869734	3.92456	5.33969	0.00258136	9.95448	0.367892	0.29958	-0.238978	0.965878	0.982997	0.928435	0.261812	0.0176676	42.8925	6.63872	2364.3	1049.96	0.0211652	848.949	1.85241	1253.94	0.0341967	0.0145165	0.638156	0.832564	0.896189	775.693	0.0126313	759.093	2.09689	64	21.6191	16.7654	2.32275	17.0813	0.251443	2.20317	0.651133	291.769	0.00584807	0.298256	5554.97	0.492671
material21	5	1008.6	1.78249e+06	-1628.67	969.13	96.3107	0.819211	4.32941	7.03816	0.000899699	10.7213	0.265612	0.184434	-0.165587	0.925035	0.97731	0.905917	0.178116	0.00792142	56.2279	6.80597	3411.66	969.13	0.0169138	1161.58	1.33825	1480.1	0.0151843	0.0093464	0.78906	0.914076	0.943001	1097.9	0.0085294	1091.45	2.15669	64	28.2608	28.9701	2.29199	17.1121	0.235519	1.79582	0.0437178	292.823	0.00347948	0.246025	5742.37	0.595425
material31	5	1002.75	1.0348e+06	-4006.9	633.556	103.167	0.719934	4.38451	7.38877	0.000945766	10.603	0.244554	0.159662	-0.132141	0.881539	0.975882	0.901494	0.154438	0.00942379	58.9966	6.60604	3378.33	633.556	0.0194087	1173.3	1.2765	1404.03	0.0140476	0.00761557	0.819519	0.929187	0.951838	1124.61	0.00693751	1095.32	1.97163	64	29.6605	30.2698	2.21509	14.6838	0.288032	2.2973	-0.196306	215.613	0.00318741	0.227309	5824.71	0.500831
material41	5	1076.06	1.39911e+06	-2408.17	838.883	119.963	0.749783	4.50912	8.11139	0.000813443	10.7803	0.231029	0.149083	-0.142523	0.899473	0.972148	0.892998	0.143517	0.008389	59.8777	6.75042	3661.39	838.883	0.016995	1262.65	1.29027	1518.97	0.0150621	0.00744086	0.815646	0.926631	0.950888	1210.59	0.00664432	1179.62	2.09725	64	30.1688	29.8391	2.23047	16.4167	0.251118	1.87739	-0.0396563	269.507	0.00337147	0.216458	6629.85	0.620297
material51	5	991.951	1.54778e+06	1912.69	887.573	110.461	0.778644	4.41343	7.51955	0.000910167	10.7362	0.249147	0.1661	-0.159608	0.919085	0.974511	0.900539	0.160469	0.00990412	56.4862	6.79575	3356.71	887.573	0.0169429	1175.73	1.30478	1374.74	0.0160565	0.00821128	0.811771	0.924487	0.949915	1132.73	0.00732605	1087.12	2.12353	64	28.4823	27.2705	2.26123	16.6107	0.246999	1.91344	0.133	275.917	0.00415148	0.23051	6073.93	0.59905
material61	5	897.96	1.15672e+06	4041.71	721.921	101.481	0.753509	4.35075	7.13199	0.00134654	10.4662	0.267894	0.187613	-0.164103	0.919806	0.976391	0.905189	0.177864	0.0108533	54.5106	6.65855	3011.74	721.921	0.0182422	1081.78	1.43392	1346.7	0.0143818	0.00784456	0.7615	0.90022	0.935257	1030.42	0.00708151	987.53	2.03767	64	27.5017	25.6248	2.27661	15.206	0.265079	2.15952	0.215147	231.224	0.00410119	0.239031	6061.55	0.4853
material71	5	1023.63	1.11565e+06	-1451.33	693.604	100.372	0.747167	4.36913	7.28506	0.00109189	10.5352	0.256584	0.175684	-0.155945	0.911996	0.976397	0.902733	0.169111	0.00968169	59.1717	6.66505	3450.55	693.604	0.0183084	1204.22	1.33675	1498.87	0.00966668	0.00690086	0.792602	0.916086	0.944146	1145.17	0.00651421	1123.08	2.05477	64	29.9483	29.8007	2.27661	15.0405	0.262355	2.18655	-0.0642498	226.216	0.00325078	0.234058	6090.17	0.487356
material81	5	1172.77	1.53748e+06	-9549.36	785.306	90.783	0.792755	4.32968	7.18965	0.00088174	10.5635	0.239242	0.154014	-0.155412	0.911837	0.978238	0.902763	0.155536	0.00461147	63.2182	6.68347	3981.48	785.306	0.0192483	1326.89	1.21593	1590.57	0.0114501	0.00806745	0.842857	0.940349	0.958109	1269.37	0.0076217	1261.07	2.05201	64	31.7034	33.792	2.29199	16.0006	0.269905	2.18652	-0.345557	256.02	0.00253202	0.245104	5942.41	0.527364
material91	5	932.651	1.43079e+06	-8378.35	843.662	62.9578	0.861115	4.08303	6.01121	0.00137448	10.1801	0.265058	0.177175	-0.192824	0.94134	0.984537	0.9165	0.173889	0.00973451	54.313	6.58909	3121.23	843.662	0.0219352	1059.79	1.30786	1292.09	0.0193102	0.011219	0.810798	0.924531	0.949578	1008.71	0.0104126	992.204	1.99091	64	27.1348	30.2928	2.32275	15.9994	0.270784	1.80547	-0.189291	255.98	0.00225344	0.288478	5348.36	0.44829
material101	5	620.646	1.2704e+06	5517.39	850.446	58.0955	0.872113	3.99459	5.55015	0.00274883	9.71327	0.292467	0.207469	-0.230804	0.959528	0.985778	0.922844	0.203015	0.0174434	41.1124	6.44279	2052.43	850.446	0.029807	731.602	1.45744	875.002	0.0328988	0.0157687	0.776499	0.902379	0.941402	700.911	0.014186	658.173	1.95531	64	20.4449	17.2191	2.43042	15.5015	0.273759	1.86062	0.407182	240.297	0.003244	0.321468	5038.8	0.38959
[truncated: 1 more columns]

## Sheet: FilterCutoff_FixBinSize
ROI	Cutoff(mm)	-333-1AutoCorrelation	-333-1ClusterProminence	-333-1ClusterShade	-333-1ClusterTendendcy	-333-1Contrast	-333-1Correlation	-333-1DifferenceEntropy	-333-1Dissimilarity	-333-1Energy	-333-1Entropy	-333-1Homogeneity	-333-1Homogeneity2	-333-1InformationMeasureCorr1	-333-1InformationMeasureCorr2	-333-1InverseDiffMomentNorm	-333-1InverseDiffNorm	-333-1InverseVariance	-333-1MaxProbability	-333-1SumAverage	-333-1SumEntropy	-333-1SumVariance	-333-1Variance	-333GrayLevelNonuniformity	-333HighGrayLevelRunEmpha	-333LongRunEmphasis	-333LongRunHighGrayLevelEmpha	-333LongRunLowGrayLevelEmpha	-333LowGrayLevelRunEmpha	-333RunLengthNonuniformity	-333RunPercentage	-333ShortRunEmphasis	-333ShortRunHighGrayLevelEmpha	-333ShortRunLowGrayLevelEmpha	EnergyNorm	GlobalEntropy	GlobalMax	GlobalMean	GlobalMedian	GlobalMin	GlobalStd	GlobalUniformity	Kurtosis	Skewness	Variance	Busyness	Coarseness	Complexity	Contrast
material11	8	208.283	184003	2692.14	281.57	14.5979	0.901422	3.01203	2.53013	0.0066239	8.30847	0.479087	0.415813	-0.276248	0.964521	0.988789	0.937456	0.319789	0.0458318	23.7941	5.78734	605.815	281.57	0.0481749	70.2732	5.07078	286.773	0.469486	0.066488	0.316879	0.597131	0.75639	53.3681	0.0467142	50.7124	0.867259	17.5	5.63543	4.4989	0.499878	4.35407	0.58915	2.34648	0.627496	18.958	0.011958	2.13345	58.6909	0.0585554
material21	8	358.589	200971	-632.513	323.33	21.5457	0.875053	3.34196	3.41809	0.00257234	9.03204	0.373174	0.290493	-0.214	0.940848	0.984363	0.918614	0.274332	0.014619	33.6537	6.01844	1087.04	323.33	0.046036	109.166	2.84286	305.241	0.170678	0.0422174	0.453254	0.721592	0.820027	87.8859	0.0324474	88.0947	0.999612	18	8.05945	8.49902	0.500977	4.81079	0.500269	1.82876	-0.0464153	23.1437	0.006024	1.64054	73.1996	0.0836673
material31	8	419.945	159218	-1835.49	239.261	26.0572	0.803604	3.45535	3.73968	0.0029208	8.97289	0.354812	0.269934	-0.174412	0.905639	0.983162	0.916143	0.259936	0.0119707	38.2959	5.86275	1291.17	239.261	0.0538912	128.691	2.62807	304.512	0.140006	0.0329051	0.487529	0.747945	0.834481	106.272	0.0277802	103.29	0.886503	19	9.17557	10.001	0.500977	4.37052	0.576585	2.45984	-0.44861	19.1014	0.00457449	1.37483	100.146	0.0728941
material41	8	439.329	195608	-1156.41	303.75	31.521	0.811977	3.61054	4.26786	0.00213193	9.26238	0.320316	0.231059	-0.174088	0.91057	0.97969	0.905203	0.223302	0.0138659	38.5368	6.03529	1360.1	303.75	0.0490536	134.44	2.20976	273.907	0.113804	0.030839	0.558996	0.789531	0.865806	115.648	0.0256979	108.793	0.966889	19	9.25348	9.5	0.500977	4.81351	0.522774	1.99615	-0.18953	23.1698	0.0058605	1.24829	108.429	0.0991542
material51	8	383.341	190914	-210.795	309.259	28.1302	0.833248	3.51444	3.90185	0.00248385	9.16668	0.346652	0.260641	-0.194014	0.927635	0.981901	0.91294	0.247545	0.0194326	35.3869	6.03791	1170.62	309.259	0.0470297	122.376	2.44764	247.295	0.149354	0.0343326	0.520452	0.764582	0.850521	104.91	0.02765	95.0503	0.995562	19	8.49892	8.49805	0.500977	4.77723	0.503073	1.93128	-0.00648496	22.8219	0.00630339	1.39159	97.6128	0.0871931
material61	8	341.118	143920	196.63	251.884	24.6794	0.82153	3.42282	3.6147	0.00318217	8.9289	0.367419	0.285344	-0.201725	0.930171	0.983185	0.916838	0.268861	0.0143352	33.7234	5.92417	1024.68	251.884	0.0486045	111.262	2.89511	267.807	0.134608	0.0363938	0.475567	0.728352	0.83427	93.7065	0.0300073	84.4748	0.997037	18.5	8.0942	7.9989	0.501343	4.3545	0.502052	2.18542	0.0432703	18.9616	0.00736658	1.50587	79.4039	0.0749719
material71	8	380.648	149271	-1018.09	251.062	23.5561	0.828445	3.40957	3.59545	0.00289205	8.91551	0.364729	0.281012	-0.200425	0.928861	0.982969	0.914867	0.258579	0.0147473	35.9873	5.91375	1155.48	251.062	0.0500934	117.067	2.9477	323.678	0.112829	0.0369113	0.473914	0.729837	0.83261	95.6431	0.0312886	93.8821	0.990411	18	8.64292	9	0.500977	4.3801	0.506632	2.21776	-0.235219	19.1853	0.00553867	1.51507	79.3571	0.0756
material81	8	425.801	201124	-2571.59	287.504	20.9718	0.86403	3.33617	3.4732	0.00292417	8.84728	0.35847	0.272518	-0.209817	0.935065	0.984659	0.916877	0.266976	0.011976	37.9034	5.90392	1311.47	287.504	0.0529024	124.795	2.49356	319.084	0.122377	0.0392756	0.491074	0.751918	0.835261	101.131	0.0330401	103.971	0.943786	18	9.06714	10.002	0.500977	4.66497	0.538456	2.1735	-0.445765	21.7619	0.00432027	1.63705	75.262	0.0790523
material91	8	311.263	149886	-1629.73	285.197	12.3485	0.916998	2.99179	2.68331	0.00484618	8.30227	0.405027	0.322527	-0.265737	0.959936	0.990248	0.931982	0.305205	0.0257129	31.1802	5.74843	931.972	285.197	0.0550308	93.7865	2.95228	264.344	0.227436	0.0518628	0.420421	0.707292	0.799553	72.9555	0.0382559	74.7948	0.997986	17.5	7.38137	8.49792	0.499878	4.50726	0.501395	1.698	-0.224224	20.3154	0.00368093	2.34301	49.2372	0.0568539
material101	8	165.01	75497.1	677.736	215.166	8.80014	0.921416	2.76866	2.22161	0.00933588	7.6737	0.449156	0.374901	-0.28942	0.962026	0.989912	0.932308	0.344837	0.0481913	21.2996	5.43593	466.823	215.166	0.0611433	56.7056	3.75241	168.065	0.44601	0.0722197	0.33588	0.645648	0.74901	43.8019	0.0432534	39.1502	0.899666	14.5	4.96202	4.00024	0.499146	3.81249	0.567919	1.68271	0.337668	14.5351	0.00648362	2.98568	27.1443	0.0458581
material11	3	318.634	515738	6124.59	506.149	43.0987	0.843063	3.51466	3.91548	0.00788465	8.84258	0.445021	0.383997	-0.239525	0.953885	0.980707	0.927508	0.282867	0.0576285	28.4866	6.00233	1011.69	506.149	0.0454273	115.29	4.80342	275.315	0.628967	0.0663624	0.375881	0.63824	0.79466	96.8884	0.0470972	78.4768	0.940774	22	6.62596	4.50098	0.499512	5.88056	0.540487	2.16042	0.680623	34.581	0.0121055	1.02818	208.025	0.13318
material21	3	425.914	344484	22.0334	427.351	55.3252	0.770757	3.93757	5.23846	0.00199845	9.73161	0.320264	0.239354	-0.15014	0.891053	0.973539	0.900784	0.21783	0.0176862	36.4915	6.20437	1344.66	427.351	0.0430408	135.271	2.32476	261.471	0.174423	0.0425023	0.543775	0.777944	0.860831	118.017	0.0331978	106.612	0.999085	21.5	8.62296	8.49817	0.498657	5.67999	0.500634	1.80631	0.126449	32.2623	0.0109522	0.786857	210.749	0.179815
material31	3	486.952	254411	-262.884	319.784	69.585	0.642575	4.10343	5.98824	0.00157949	9.8647	0.280913	0.195655	-0.114739	0.836147	0.972314	0.896287	0.191904	0.0120944	41.2021	6.13109	1549.76	319.784	0.047219	155.315	1.84014	248.786	0.0803387	0.0303525	0.605107	0.825199	0.880233	139.524	0.0250184	123.366	0.962543	23.5	9.79354	9.50098	0.499146	5.23995	0.525738	2.28479	0.00127858	27.4571	0.00906515	0.667012	299.98	0.148593
material41	3	505.721	318647	-37.0196	404.311	74.8243	0.68767	4.16689	6.26066	0.00151866	9.94372	0.277329	0.193678	-0.127203	0.86088	0.967954	0.888275	0.182596	0.0137674	41.1509	6.2252	1624.12	404.311	0.0426519	161.208	1.91403	259.44	0.0949436	0.0315596	0.608482	0.82216	0.883417	144.984	0.0258501	128.449	0.99001	22.5	9.78102	9.49768	0.499878	5.72584	0.506909	1.86925	0.0687606	32.7852	0.0105241	0.65422	271.677	0.198539
material51	3	443.825	328644	1268.66	406.684	65.145	0.723875	4.02933	5.63188	0.00186233	9.7976	0.304535	0.222267	-0.152412	0.895367	0.972079	0.898742	0.208928	0.0168737	37.865	6.23174	1407.35	406.684	0.041734	147.64	2.07205	230.324	0.11933	0.0345045	0.573836	0.801823	0.870378	133.429	0.0272785	112.704	0.999879	22.5	9.00434	8.49792	0.499878	5.62413	0.500084	1.9611	0.232815	31.6309	0.0123101	0.720309	248.714	0.175746
material61	3	392.26	246562	1864.43	332.696	59.8344	0.695136	3.96413	5.32997	0.00331643	9.44939	0.328344	0.250626	-0.154495	0.891324	0.973097	0.901889	0.222176	0.0251132	36.0025	6.06213	1229.12	332.696	0.0445809	135.167	2.6266	237.547	0.136123	0.0364107	0.525393	0.762478	0.855295	120.4	0.0297027	99.2866	0.995067	22	8.5162	7.49805	0.499512	5.17351	0.503416	2.19949	0.340567	26.7652	0.012264	0.751219	251.311	0.141601
material71	3	444.453	222463	271.718	311.59	59.9083	0.677483	4.00397	5.53035	0.00240384	9.56763	0.306834	0.225419	-0.141632	0.876073	0.971569	0.895713	0.204685	0.0176313	39.0657	6.07694	1399.85	311.59	0.0463999	144.685	2.19629	253.394	0.0972783	0.0335186	0.564772	0.792542	0.868529	127.965	0.0287371	112.371	0.993619	21.5	9.30108	9.00208	0.498657	5.08579	0.504416	2.18033	0.0757962	25.8653	0.0116236	0.723185	224.375	0.156546
material81	3	505.453	274091	-1978.38	331.206	53.4279	0.722189	3.95838	5.46109	0.00169708	9.64795	0.282985	0.195075	-0.132069	0.862847	0.973963	0.895317	0.193114	0.0113774	41.7616	6.09788	1603.11	331.206	0.0505295	154	1.73972	247.038	0.0861157	0.0356146	0.638696	0.84247	0.893088	137.988	0.0308752	125.261	0.936646	21.5	9.87719	10.498	0.498657	5.26379	0.543267	2.17734	-0.238303	27.7075	0.0083327	0.76915	215.854	0.156375
material91	3	385.225	247661	-1794.3	341.902	38.0012	0.799942	3.72771	4.58907	0.00286151	9.25221	0.314121	0.226538	-0.165475	0.900882	0.978255	0.903987	0.219792	0.0218232	35.171	5.97896	1194.08	341.902	0.0541918	121.369	2.06082	204.078	0.174476	0.0483051	0.550733	0.797274	0.857421	106.235	0.0376311	93.7225	0.993001	20	8.20114	8.99902	0.498047	5.14503	0.504843	1.88533	-0.0964118	26.4713	0.00809181	0.925476	164.455	0.136065
material101	3	233.866	205825	1742.54	324.324	32.0469	0.820149	3.56842	3.98663	0.00735588	8.63673	0.364014	0.285312	-0.2068	0.929323	0.982475	0.917874	0.265625	0.0462963	25.3611	5.74561	709.092	324.324	0.0592826	83.8474	2.87084	142.403	0.394617	0.0687893	0.448795	0.724165	0.815356	73.8798	0.0446925	56.3579	0.927541	20.5	5.77588	4.99988	0.500488	4.7968	0.549378	2.14092	0.527468	23.0093	0.0104127	1.12918	147.175	0.0953601
material11	1	372.138	733868	8056.59	615.593	51.7764	0.844834	3.60669	4.24817	0.00868397	8.94593	0.437782	0.376958	-0.240963	0.955945	0.981272	0.929309	0.275139	0.0614359	30.4095	6.06393	1208.3	615.593	0.0443213	134.079	4.54571	292.042	0.60962	0.0657102	0.381873	0.644289	0.797121	113.718	0.0453863	91.512	0.957121	24.5	7.048	5.00049	0.502441	6.46892	0.531097	2.10452	0.684007	41.847	0.0105043	0.942938	270.598	0.148261
material21	1	461.808	431375	267.008	478.74	63.3367	0.766319	4.02601	5.59022	0.00201418	9.86308	0.312677	0.23244	-0.149465	0.892615	0.973526	0.901085	0.209743	0.018536	37.8395	6.27329	1475.17	478.74	0.0416896	146.598	2.23895	273.093	0.173189	0.0424297	0.552535	0.785004	0.863623	128.923	0.0326138	115.83	0.991724	23	8.92803	9.00122	0.499756	6.01051	0.505726	1.80888	0.156553	36.1262	0.00969845	0.732312	281.366	0.180128
material31	1	521.894	316857	-1.72421	357.736	77.8887	0.642404	4.18472	6.34095	0.00145879	10.0071	0.273244	0.188312	-0.115219	0.84018	0.972576	0.896658	0.180694	0.01282	42.5174	6.21021	1675.95	357.736	0.0450651	166.513	1.80935	258.641	0.0810118	0.0303167	0.617009	0.830872	0.885059	151.171	0.0249108	132.38	0.927032	25	10.0884	9.99756	0.500488	5.5326	0.552816	2.27651	0.0501894	30.6096	0.00837392	0.626705	388.967	0.14916
material41	1	542.721	383229	80.4121	443.437	82.414	0.68655	4.23388	6.57504	0.00143087	10.0687	0.270472	0.187586	-0.126415	0.862073	0.967649	0.887759	0.177862	0.0143579	42.5425	6.28978	1757.69	443.437	0.0412872	172.7	1.87104	267.204	0.0968103	0.0310121	0.618656	0.828591	0.88695	156.508	0.0252863	137.928	0.985567	23.5	10.0997	9.50098	0.499146	5.99421	0.509971	1.86989	0.087329	35.9306	0.0103796	0.619381	313.182	0.21056
material51	1	474.911	395946	1600.75	446.025	71.9436	0.722221	4.09559	5.90937	0.00176062	9.91732	0.29848	0.216682	-0.151485	0.896365	0.971778	0.898418	0.202962	0.0171788	39.0584	6.29459	1519.49	446.025	0.0401453	157.245	2.0761	244.051	0.120956	0.0343156	0.574413	0.80222	0.870625	142.164	0.0270118	120.762	0.999293	23.5	9.28003	8.50269	0.499146	5.88625	0.50049	1.96846	0.253466	34.6479	0.01224	0.68131	287.772	0.186279
material61	1	420.405	300347	2258.65	366.819	66.5877	0.692726	4.03575	5.61824	0.00316311	9.56244	0.321615	0.24432	-0.154597	0.893632	0.974641	0.904662	0.215723	0.0224441	37.1671	6.123	1330.55	366.819	0.0436318	144.487	2.51417	240.927	0.13548	0.0361029	0.542134	0.770727	0.862952	130.244	0.0293113	106.514	0.997012	24	8.77611	7.99805	0.498047	5.43131	0.50207	2.21074	0.364881	29.4992	0.0121441	0.707034	294.161	0.151539
material71	1	479.018	268032	478.212	341.55	67.6764	0.669253	4.08542	5.86545	0.00223965	9.70463	0.298555	0.217379	-0.139708	0.875979	0.97298	0.898334	0.196434	0.0184338	40.5241	6.14156	1523.71	341.55	0.0448425	155.21	2.19953	267.028	0.0954565	0.0329856	0.576752	0.79909	0.873553	137.907	0.028515	121.394	0.989207	23.5	9.64138	9.00183	0.499146	5.33318	0.507463	2.19054	0.105631	28.4428	0.0101543	0.67364	298.629	0.15414
material81	1	546.781	340530	-2153.52	369.519	61.6562	0.714009	4.0535	5.83	0.00159895	9.79335	0.274905	0.187383	-0.131466	0.864882	0.973852	0.895676	0.181831	0.012489	43.3505	6.17451	1751.57	369.519	0.0487416	166.475	1.71509	258.18	0.0902647	0.0354643	0.652984	0.84845	0.898806	150.409	0.0306208	135.654	0.89639	23	10.2292	10.5005	0.499756	5.56985	0.57008	2.16487	-0.203424	31.0233	0.00763774	0.70474	289.93	0.158686
material91	1	422.515	323390	-1884.21	389.184	46.014	0.788537	3.84905	4.98068	0.00292848	9.41269	0.306041	0.219313	-0.162639	0.900615	0.977441	0.903566	0.207275	0.0263363	36.7	6.06026	1327.98	389.184	0.0519927	133.338	2.07435	214.745	0.189329	0.0479977	0.560687	0.801612	0.862229	118.145	0.0364193	102.943	0.988338	21.5	8.52783	9.00208	0.498657	5.498	0.508062	1.90692	-0.0461865	30.2281	0.00852122	0.83891	197.995	0.154769
material101	1	265.209	302145	2599.96	383.972	40.2086	0.810418	3.70702	4.38992	0.00830229	8.75475	0.356747	0.278348	-0.209062	0.933039	0.981904	0.918025	0.245779	0.0601504	26.7782	5.82619	822.958	383.972	0.0584999	94.0291	2.77921	153.906	0.384953	0.068871	0.464596	0.732451	0.824144	83.9004	0.0442178	64.0708	0.950987	22.5	6.07085	4.99878	0.499878	5.21827	0.533587	2.26469	0.587959	27.2303	0.0100015	1.00926	201.818	0.104418
material11	10	177.218	124756	1909.44	228.304	9.91537	0.916755	2.80996	2.15903	0.00726045	8.02346	0.494038	0.431043	-0.295995	0.968724	0.991274	0.942257	0.339504	0.0447543	22.1468	5.67414	499.654	228.304	0.0490562	60.854	5.8064	281.457	0.53492	0.0667881	0.293096	0.574238	0.742255	45.3756	0.0452534	43.1596	0.84929	16.5	5.27864	4.49963	0.499512	3.91132	0.600773	2.3938	0.593928	15.2984	0.00898234	2.80329	40.2265	0.0402825
material21	10	334.915	167190	-746.982	294.474	15.465	0.900206	3.12758	2.92713	0.00301887	8.75347	0.396731	0.315321	-0.24195	0.954013	0.987248	0.925061	0.298794	0.0109598	32.5677	5.94143	1003.43	294.474	0.046946	100.582	3.17493	323.114	0.19459	0.0427214	0.418281	0.695516	0.803417	78.2026	0.032409	82.1359	0.996501	17	7.83529	8.5	0.498047	4.55493	0.502423	1.8429	-0.0957423	20.7474	0.0048054	2.17447	48.7501	0.0633361
material31	10	397.435	136275	-1982.59	217.332	18.3855	0.844031	3.22302	3.12993	0.00389132	8.61323	0.390326	0.31004	-0.203759	0.926552	0.98724	0.926539	0.296896	0.0108905	37.2933	5.75403	1212.06	217.332	0.0553486	119.287	2.97682	359.168	0.1086	0.0331188	0.436613	0.710325	0.811901	94.383	0.0274391	97.4762	0.918536	18.5	8.97869	9.99976	0.501343	4.10631	0.555395	2.5621	-0.568045	16.8618	0.00344947	1.83335	68.5412	0.0545015
material41	10	411.169	177026	-1470.66	282.327	22.6935	0.851219	3.39097	3.62758	0.00267641	8.9571	0.349588	0.261602	-0.20682	0.934574	0.984296	0.91562	0.249583	0.0167724	37.2161	5.96276	1259.1	282.327	0.050676	123.974	2.41179	299.538	0.112394	0.0319276	0.515971	0.762886	0.848285	103.476	0.0256469	101.248	0.983551	18.5	8.9556	9.49841	0.501343	4.58779	0.511358	2.06491	-0.272965	21.0478	0.00476497	1.6196	74.6906	0.0769231
material51	10	358.991	162139	-552.187	282.448	20.7447	0.863161	3.31902	3.37867	0.00294031	8.88753	0.371029	0.286647	-0.218105	0.94158	0.984893	0.919273	0.271019	0.0203076	34.2675	5.95642	1083.97	282.448	0.048249	112.019	2.71768	278.365	0.144513	0.0357132	0.473677	0.735091	0.829756	91.9075	0.0281932	88.5081	0.999932	18	8.24326	8.49902	0.500977	4.53427	0.500047	1.95074	-0.0849084	20.5596	0.00498187	1.79145	68.156	0.0675193
material61	10	320.561	124897	-240.983	233.518	18.0541	0.856471	3.22185	3.12882	0.00355971	8.67608	0.388306	0.307161	-0.227725	0.94471	0.986772	0.924627	0.292334	0.0136512	32.6616	5.8618	951.748	233.518	0.050059	103.576	3.20437	279.348	0.164431	0.0384103	0.447717	0.708603	0.821918	85.156	0.0315363	78.9519	0.996856	18	7.8542	7.99805	0.500977	4.15523	0.502178	2.1877	-0.0626462	17.2659	0.00489623	1.9495	64.0266	0.0523396
material71	10	356.293	133145	-1278.09	237.24	17.0803	0.86568	3.19989	3.09491	0.00335066	8.64252	0.386774	0.304046	-0.22824	0.944543	0.985956	0.921223	0.284035	0.0115178	34.7133	5.84183	1070.8	237.24	0.0514829	107.879	3.31896	354.607	0.14347	0.0390511	0.439519	0.703757	0.817727	85.6336	0.0325587	87.4506	0.97779	17	8.35119	8.99805	0.498047	4.20845	0.515315	2.20591	-0.316259	17.711	0.00439885	1.99605	53.7429	0.0592243
material81	10	393.31	181646	-2557.04	280.495	15.0544	0.898126	3.11749	2.94912	0.00369903	8.53736	0.389531	0.306765	-0.245713	0.953169	0.987513	0.924222	0.29602	0.0117193	36.1635	5.83102	1200.55	280.495	0.0525464	113.781	3.01285	374.377	0.144676	0.0423249	0.435237	0.70993	0.811029	88.4216	0.0341124	95.7307	0.929581	17	8.66728	9.50024	0.498047	4.54012	0.548011	2.08557	-0.460469	20.6127	0.00350112	2.18527	50.4051	0.0625229
material91	10	284.827	127477	-1293.42	270.758	8.67869	0.937885	2.76194	2.25868	0.00586976	7.98484	0.438133	0.36101	-0.307571	0.972164	0.991748	0.93679	0.340426	0.0224544	29.618	5.67886	843.841	270.758	0.0527416	82.7257	3.68742	332.304	0.262413	0.055054	0.361022	0.656158	0.770349	60.597	0.0381745	68.3491	0.999997	16	7.03312	8.5	0.5	4.34614	0.500002	1.63127	-0.193809	18.889	0.00301759	3.23717	32.2051	0.043299
material101	10	142.425	57573	664.757	188.271	5.81923	0.940036	2.50648	1.81004	0.0117271	7.27597	0.490557	0.425084	-0.332165	0.972047	0.990974	0.935619	0.386775	0.0501969	19.6786	5.31171	394.678	188.271	0.0593545	48.4226	4.82993	204.317	0.583315	0.0745104	0.274507	0.588943	0.708329	35.0646	0.0399985	33.909	0.785244	12.5	4.62545	4.00085	0.500488	3.53827	0.64131	1.66659	0.353828	12.5194	0.00682285	4.1529	14.3286	0.0385011
material11	5	270.986	333590	4328.72	396.869	27.7546	0.869275	3.31678	3.28223	0.00620183	8.6818	0.455358	0.393225	-0.248921	0.956705	0.98283	0.928327	0.301721	0.0358433	26.7363	5.93483	829.569	396.869	0.0462144	93.468	4.61684	284.357	0.486643	0.0662798	0.344231	0.622772	0.77152	74.189	0.0467485	66.2062	0.942188	19	6.26416	5.00049	0.500977	5.19348	0.539534	2.20079	0.648848	26.9722	0.0146721	1.36988	111.549	0.104609
material21	5	399.19	270593	-374.203	377.602	37.6784	0.818541	3.69575	4.40263	0.00214258	9.4531	0.339858	0.257716	-0.171286	0.910962	0.977533	0.906363	0.241485	0.0149375	35.4519	6.12599	1237.61	377.602	0.044495	123.887	2.43905	276.255	0.159019	0.0419672	0.508387	0.759481	0.844439	105.007	0.0322656	98.6716	0.998726	19.5	8.41119	8.49792	0.499878	5.28472	0.500883	1.79723	0.0454157	27.9283	0.00959414	1.04654	124.949	0.142519
material31	5	457.919	210616	-1210.47	285.774	46.634	0.719421	3.8414	4.96538	0.00201762	9.51565	0.306432	0.219131	-0.135667	0.865978	0.976203	0.902176	0.210707	0.0153736	39.9066	6.02734	1433.58	285.774	0.0495041	143.749	2.06328	262.187	0.0959679	0.0315305	0.562386	0.798608	0.864436	125.813	0.0261037	114.075	0.950517	21	9.5056	9.50024	0.502441	4.87056	0.533905	2.30006	-0.195695	23.7224	0.00709899	0.884849	185.573	0.115192
material41	5	475.074	266269	-684.171	366.138	52.4123	0.74956	3.94013	5.35424	0.00178515	9.6594	0.292718	0.205993	-0.145674	0.883803	0.972171	0.893216	0.195628	0.0167392	39.8318	6.14889	1500.68	366.138	0.0450471	149.232	2.10663	258.967	0.132944	0.0312762	0.593381	0.811264	0.878867	132.271	0.0259213	119.182	0.987903	20.5	9.51291	9.49927	0.500488	5.35641	0.508362	1.8783	-0.0394364	28.6911	0.00905457	0.843874	171.417	0.163067
material51	5	416.861	265329	521.73	367.67	45.8457	0.778264	3.81337	4.8383	0.00209479	9.53878	0.318199	0.233093	-0.1654	0.906097	0.974573	0.900812	0.221682	0.019098	36.6827	6.15714	1299.48	367.67	0.0441866	135.901	2.19681	232.805	0.134092	0.0355645	0.554418	0.789403	0.863122	120.278	0.0283249	104.332	0.999927	20	8.7414	8.50098	0.498047	5.28436	0.50005	1.91455	0.131634	27.9245	0.010508	0.937912	154.202	0.143146
material61	5	371.669	191835	1060.51	294.104	41.4624	0.752882	3.74722	4.54874	0.00317395	9.24651	0.340906	0.259733	-0.170577	0.90649	0.976781	0.906173	0.234732	0.0214155	35.1288	6.00702	1142.18	294.104	0.0467897	125.099	2.60936	235.017	0.131018	0.0362979	0.513016	0.755194	0.849644	109.309	0.0298948	92.8963	0.99657	20	8.35931	7.99805	0.498047	4.7981	0.502376	2.15975	0.215639	23.0218	0.0104908	0.988885	152.18	0.112447
material71	5	419.65	181586	-374.796	279.79	40.5222	0.746984	3.75557	4.62273	0.00243527	9.32237	0.32833	0.244672	-0.161272	0.897316	0.977041	0.904125	0.223815	0.0155272	37.9385	6.01232	1299.07	279.79	0.0481101	133.76	2.4009	271.99	0.092443	0.0333464	0.538362	0.774721	0.858772	115.392	0.0287571	104.892	0.989986	20	9.0877	8.99902	0.498047	4.72326	0.506925	2.19009	-0.0656157	22.3092	0.00815575	0.968231	153.948	0.111996
material81	5	472.522	241720	-2383.19	311.378	36.124	0.792094	3.69871	4.52772	0.00209618	9.31645	0.312253	0.22372	-0.160763	0.896588	0.978123	0.902726	0.219838	0.0118732	40.185	6.01674	1478.85	311.378	0.0522	142.479	1.96059	266.126	0.0959527	0.0364204	0.580537	0.810303	0.87119	123.45	0.0310156	116.248	0.936616	19.5	9.56209	10.0023	0.499878	4.98193	0.543287	2.18872	-0.346244	24.8197	0.00697426	1.03485	129.195	0.128011
material91	5	353.704	197898	-1884.98	313.806	23.5717	0.860265	3.41762	3.67212	0.00342529	8.86902	0.348592	0.260819	-0.200588	0.928212	0.984579	0.916788	0.249217	0.0227876	33.5348	5.87577	1078.83	313.806	0.0553124	110.261	2.30631	219.567	0.186318	0.048427	0.507835	0.769316	0.839741	93.2681	0.0367182	85.5112	0.98283	19	7.88664	8.99902	0.500977	4.82893	0.511854	1.81013	-0.187681	23.3186	0.00564247	1.32878	106.652	0.0922417
material101	5	203.869	129212	989.679	271.163	18.5871	0.871703	3.24492	3.12865	0.00784705	8.2685	0.398205	0.318457	-0.234397	0.942703	0.985712	0.923032	0.281674	0.0512401	23.7255	5.62047	598.956	271.163	0.0610358	72.0287	3.05907	144.691	0.383046	0.0699297	0.409466	0.700446	0.793095	61.2319	0.0442169	48.4841	0.909814	17.5	5.44517	4.4989	0.499878	4.34091	0.561198	1.86261	0.404858	18.8435	0.00877238	1.65716	70.444	0.0733758
[truncated: 1 more columns]

## Sheet: Matrix_64Levels
ROI	Matrix	-333-1AutoCorrelation	-333-1ClusterProminence	-333-1ClusterShade	-333-1ClusterTendendcy	-333-1Contrast	-333-1Correlation	-333-1DifferenceEntropy	-333-1Dissimilarity	-333-1Energy	-333-1Entropy	-333-1Homogeneity	-333-1Homogeneity2	-333-1InformationMeasureCorr1	-333-1InformationMeasureCorr2	-333-1InverseDiffMomentNorm	-333-1InverseDiffNorm	-333-1InverseVariance	-333-1MaxProbability	-333-1SumAverage	-333-1SumEntropy	-333-1SumVariance	-333-1Variance	-333GrayLevelNonuniformity	-333HighGrayLevelRunEmpha	-333LongRunEmphasis	-333LongRunHighGrayLevelEmpha	-333LongRunLowGrayLevelEmpha	-333LowGrayLevelRunEmpha	-333RunLengthNonuniformity	-333RunPercentage	-333ShortRunEmphasis	-333ShortRunHighGrayLevelEmpha	-333ShortRunLowGrayLevelEmpha	EnergyNorm	GlobalEntropy	GlobalMax	GlobalMean	GlobalMedian	GlobalMin	GlobalStd	GlobalUniformity	Kurtosis	Skewness	Variance	Busyness	Coarseness	Complexity	Contrast
material11	512	728.255	2.76375e+06	22460.3	1146.14	12.3842	0.978621	2.81134	2.15542	0.0057151	8.90314	0.535735	0.483609	-0.416332	0.995355	0.99685	0.96808	0.336331	0.0366424	42.1813	6.59412	2412.59	1146.14	0.0146904	921.132	4.28104	2502.46	0.0891954	0.0128067	0.43318	0.673197	0.827157	780.917	0.00971243	785.851	2.11983	64	22.0824	17.2268	2.33813	17.2693	0.246692	2.13539	0.613559	298.227	0.00245919	0.685778	2578.57	0.219318
material21	512	1045.59	2.23244e+06	-687.251	1112.41	16.6017	0.970591	3.15806	2.89775	0.00212351	9.62937	0.419821	0.344335	-0.349165	0.991457	0.995764	0.957104	0.30152	0.0184235	55.5568	6.81581	3488.1	1112.41	0.0142837	1210.12	2.30745	2448.8	0.0330012	0.00776281	0.609253	0.801434	0.891735	1077.68	0.006376	1128.93	2.1679	64	28.8478	29.7161	2.32275	17.2261	0.234182	1.77718	0.00856338	296.737	0.00131522	0.626209	2313.1	0.238808
material31	512	1132.75	1.70168e+06	-6207.98	847.155	19.3952	0.955236	3.25104	3.18054	0.00181816	9.68581	0.386378	0.304692	-0.317673	0.987025	0.99507	0.953148	0.291294	0.0115627	60.8544	6.73964	3775.56	847.155	0.016621	1322.01	1.99718	2233.34	0.0261943	0.00604012	0.663732	0.837046	0.908578	1205.93	0.00526937	1224.99	2.01706	64	31.4862	32.3	2.27661	15.2845	0.280032	2.29458	-0.241744	233.616	0.00114995	0.593855	2389.63	0.198175
material41	512	1178.54	2.04579e+06	-3154.05	1036.21	21.4074	0.959518	3.3333	3.38589	0.00170982	9.79191	0.373974	0.291026	-0.322751	0.988399	0.994561	0.950288	0.276442	0.0120672	60.8224	6.82146	3952.3	1036.21	0.0151552	1373.76	1.95153	2244.7	0.0265856	0.00603351	0.682635	0.844248	0.915883	1262.19	0.005184	1272.39	2.13977	64	31.4838	31.5771	2.27661	16.7681	0.244161	1.87912	-0.0807534	281.168	0.00121171	0.5901	2400.37	0.240163
material51	512	1057.3	2.07147e+06	2392.76	1044.43	19.173	0.963947	3.23279	3.09555	0.00201271	9.69207	0.402183	0.324275	-0.343242	0.99095	0.995133	0.954454	0.298986	0.0150924	56.6034	6.83339	3521.49	1044.43	0.0146001	1261.95	2.06428	2057.42	0.0284329	0.00698386	0.64701	0.82596	0.903628	1155.93	0.00587105	1143.33	2.13621	64	29.3666	28.3472	2.29199	16.7614	0.243868	1.8846	0.0859087	280.946	0.00149874	0.60798	2318.74	0.233126
material61	512	959.856	1.62971e+06	4351.11	871.378	17.7957	0.959973	3.19186	2.95744	0.00292822	9.44196	0.420762	0.345268	-0.353124	0.991243	0.995475	0.956384	0.293524	0.0191253	54.6429	6.7162	3168.34	871.378	0.0154294	1179.61	2.41521	2047.36	0.0270073	0.00685464	0.607436	0.798171	0.892121	1076.38	0.00581614	1041.37	2.06067	64	28.3668	26.686	2.30737	15.3851	0.260652	2.12808	0.16623	236.702	0.00160263	0.615737	2372.08	0.193916
material71	512	1077.12	1.58005e+06	-2501.93	842.94	17.6409	0.959002	3.20271	3.04181	0.00226358	9.5217	0.400748	0.32145	-0.342578	0.990191	0.995503	0.955014	0.292206	0.0162136	59.0185	6.7282	3577.22	842.94	0.0159918	1276.59	2.18145	2274.11	0.0190175	0.00633667	0.634662	0.817159	0.900336	1157.23	0.00564405	1167.79	2.05842	64	30.6179	30.8081	2.30737	15.1769	0.261747	2.1852	-0.103747	230.339	0.00123178	0.608343	2352.17	0.190937
material81	512	1200.3	2.01052e+06	-11284.7	934.469	15.7106	0.966931	3.14209	2.97779	0.00194955	9.52402	0.388591	0.305448	-0.341336	0.99003	0.995976	0.955648	0.294392	0.0110418	62.3093	6.72457	4024.13	934.469	0.0170416	1365.01	1.77948	2264.73	0.0209048	0.00711322	0.676258	0.851225	0.910069	1237.45	0.0061747	1290.94	2.05615	64	32.1598	34.2996	2.30737	16.0217	0.269497	2.20439	-0.369173	256.695	0.000992019	0.620004	2360	0.208817
material91	512	964.291	1.85727e+06	-7580.25	997.443	11.5631	0.97708	2.93942	2.53998	0.00338079	9.17478	0.421136	0.343151	-0.37336	0.992565	0.997027	0.961776	0.328547	0.0249107	53.5844	6.61591	3203.48	997.443	0.0177134	1129.69	2.05332	1916.61	0.0393842	0.0094427	0.629674	0.824777	0.894819	1019.43	0.00749974	1038.24	2.01604	64	27.7642	30.9619	2.3689	16.3524	0.264466	1.80118	-0.190931	267.401	0.00101979	0.651487	2447.43	0.207081
material101	512	613.328	1.55651e+06	9645.26	924.583	10.0528	0.978488	2.82655	2.23861	0.00733098	8.68319	0.469473	0.402995	-0.399309	0.99341	0.997416	0.966275	0.356163	0.0421972	39.2273	6.39069	2002.83	924.583	0.0186658	799.076	2.86618	1339.95	0.0830033	0.0123109	0.531611	0.756998	0.861956	724.499	0.00848302	663.813	1.9645	64	20.5587	17.4344	2.4458	15.5296	0.271494	1.85269	0.401901	241.17	0.00152362	0.679704	2801.84	0.179077
material11	400	715.623	2.62492e+06	21383.9	1118.95	20.6182	0.963814	3.10695	2.77501	0.00485382	9.19493	0.490786	0.433382	-0.362072	0.991385	0.994833	0.95982	0.319764	0.0330542	42.0019	6.59146	2372.85	1118.95	0.0166461	893.197	3.27926	1949.52	0.0695226	0.0139426	0.489677	0.721663	0.84786	778.889	0.0110366	767.619	2.1038	64	21.7553	16.8884	2.32275	17.1563	0.249709	2.14057	0.621207	294.34	0.00286205	0.570893	3067.49	0.25984
material21	400	1046.29	2.19599e+06	-744.116	1101.38	28.2509	0.949982	3.50375	3.78014	0.00170149	9.98482	0.371624	0.291811	-0.29002	0.982951	0.992887	0.945357	0.261317	0.016757	55.7854	6.82055	3498.94	1101.38	0.0150516	1208.17	1.91429	2055.25	0.0265562	0.00832283	0.661799	0.838504	0.907149	1097.74	0.00700129	1125.67	2.17534	64	28.7278	29.4546	2.32275	17.3318	0.232525	1.77159	0.0204624	300.392	0.00166851	0.500367	2874.72	0.302547
material31	400	1123.69	1.6177e+06	-5582.37	823.885	32.9002	0.923201	3.60237	4.14538	0.00141797	10.0363	0.3379	0.251788	-0.257304	0.973843	0.991767	0.940426	0.242685	0.00963575	60.8588	6.73527	3753.24	823.885	0.0172384	1306.2	1.6607	1914.19	0.0194956	0.00649308	0.71364	0.870826	0.92219	1212.13	0.00573906	1212.97	2.02603	64	31.2621	32.0232	2.27661	15.351	0.277623	2.27607	-0.220032	235.654	0.00149048	0.466654	3031.53	0.254496
material41	400	1163.97	1.96352e+06	-2749.03	1016.06	36.1554	0.931277	3.68379	4.39945	0.00135384	10.1369	0.327756	0.241674	-0.263772	0.976752	0.990958	0.937032	0.230081	0.0105643	60.6298	6.81733	3911.84	1016.06	0.0157329	1354.39	1.67357	1925.34	0.0226703	0.00651392	0.728326	0.874736	0.928062	1262.41	0.00570271	1255.9	2.14389	64	31.182	31.1926	2.26123	16.8401	0.242908	1.86613	-0.063779	283.588	0.0015676	0.462855	3064.85	0.308991
material51	400	1045.61	1.98199e+06	2481.6	1020.72	32.3273	0.938602	3.57563	4.01825	0.00160683	10.027	0.355038	0.272773	-0.28524	0.982054	0.991927	0.942324	0.25488	0.0137475	56.5159	6.82899	3489.5	1020.72	0.0153089	1240.96	1.75487	1766.34	0.0233162	0.00739738	0.694447	0.858658	0.916736	1152.72	0.0063543	1130.3	2.13454	64	29.143	28.0549	2.27661	16.7631	0.244217	1.88399	0.0990278	281	0.00190522	0.482405	2911.37	0.293971
material61	400	947.16	1.54561e+06	4530.49	848.059	29.9837	0.931704	3.53004	3.83613	0.00243955	9.76178	0.37493	0.295677	-0.29485	0.982763	0.992491	0.944778	0.254584	0.0169033	54.5029	6.70733	3132.48	848.059	0.0163026	1155.25	2.02408	1756.4	0.0217152	0.00722993	0.654316	0.831701	0.905634	1071.49	0.00617201	1026.49	2.06001	64	28.0986	26.2784	2.29199	15.3937	0.261048	2.12589	0.181861	236.968	0.00203802	0.490522	2967.34	0.243726
material71	400	1077.79	1.52194e+06	-2055.12	826.313	30.1246	0.929651	3.55492	3.97545	0.00183135	9.86561	0.353014	0.270079	-0.283241	0.980528	0.992427	0.942611	0.248487	0.0138513	59.2872	6.72706	3588.88	826.313	0.0166943	1271.59	1.79809	1931.1	0.0154213	0.00645692	0.688911	0.854029	0.915719	1173.79	0.00586221	1168.42	2.06694	64	30.5931	30.5774	2.30737	15.2477	0.260166	2.17825	-0.0862329	232.492	0.00159018	0.480879	2950.03	0.243874
material81	400	1199.98	1.9416e+06	-10818.3	913.062	26.6909	0.943196	3.49558	3.89228	0.00151928	9.88007	0.338483	0.250905	-0.280434	0.979872	0.993235	0.943289	0.245216	0.00940227	62.5584	6.72694	4030.21	913.062	0.017728	1361.2	1.53056	1966.41	0.0171044	0.00751984	0.734996	0.885703	0.927594	1259.19	0.00676925	1287.75	2.0634	64	32.0888	34.0381	2.29199	16.0646	0.267449	2.19541	-0.354941	258.07	0.00125892	0.495326	2931.3	0.262809
material91	400	968.619	1.80718e+06	-7630.13	974.916	19.7989	0.960192	3.29441	3.34088	0.00256536	9.554	0.367131	0.282067	-0.311212	0.985116	0.994949	0.950693	0.275543	0.0208359	54.0311	6.6294	3221.84	974.916	0.0189956	1122.12	1.71828	1649.73	0.0305404	0.00985939	0.695725	0.86442	0.915785	1032.22	0.00839633	1038.88	2.01788	64	27.7825	30.7466	2.35352	16.3411	0.264439	1.81263	-0.182663	267.032	0.00126674	0.530184	2924.79	0.254073
material101	400	600.432	1.46044e+06	8919.4	893.14	16.7849	0.963107	3.14932	2.90563	0.00595959	9.00455	0.416462	0.342696	-0.340818	0.987552	0.99572	0.957013	0.321474	0.0335321	39.056	6.38902	1960.27	893.14	0.0214405	760.943	2.2572	1112.66	0.0614262	0.0141457	0.600741	0.804561	0.886002	704.026	0.0108837	646.864	1.94893	64	20.2703	17.2114	2.41504	15.3625	0.275315	1.88043	0.416108	236.006	0.00184779	0.568114	3246.95	0.209694
material11	256	729.728	2.58503e+06	20396.2	1112.85	47.5007	0.918127	3.63567	4.27455	0.0031819	9.73453	0.409126	0.344193	-0.277175	0.977956	0.988559	0.940934	0.287484	0.0226124	43.0531	6.63765	2438.93	1112.85	0.0196086	893.276	2.18609	1409.82	0.0437033	0.0143425	0.590939	0.799532	0.881709	812.737	0.0120189	779.092	2.11791	64	21.8713	16.9423	2.35352	17.3429	0.247721	2.1511	0.629442	300.777	0.00439432	0.382747	4395.36	0.395905
material21	256	1040.3	2.00651e+06	-1745.43	1043.48	63.1936	0.885796	4.04814	5.7147	0.00112894	10.4951	0.299286	0.217743	-0.203535	0.952514	0.984621	0.921145	0.204551	0.0119837	56.3994	6.81787	3501.81	1043.48	0.0163256	1194.9	1.50626	1666.17	0.0190621	0.00906699	0.739994	0.887747	0.929231	1111.29	0.00810828	1120.75	2.17239	64	28.6464	29.5161	2.32275	17.3254	0.232922	1.76887	0.0180561	300.169	0.00259244	0.319391	4476.36	0.473712
material31	256	1140.34	1.44977e+06	-5778.04	763.947	74.2278	0.822882	4.16482	6.29305	0.000969162	10.5484	0.267631	0.181328	-0.169115	0.926039	0.982153	0.913907	0.176107	0.00861426	62.2225	6.71785	3844.71	763.947	0.0179988	1320.75	1.37546	1680.91	0.013533	0.00655676	0.777692	0.90951	0.939727	1250.16	0.0058287	1233.92	2.03019	64	31.54	32.4077	2.29199	15.4653	0.277384	2.27787	-0.237924	239.176	0.00236668	0.288163	4870.96	0.418736
material41	256	1179.87	1.8172e+06	-3504.91	966.369	82.1502	0.843303	4.25144	6.71035	0.000936929	10.6423	0.257657	0.172437	-0.177221	0.934799	0.980276	0.908765	0.165059	0.00885162	61.9296	6.81653	4003.82	966.369	0.0164734	1370.69	1.38052	1702.77	0.0165997	0.00680171	0.794656	0.914005	0.945778	1305.51	0.00598651	1279.26	2.16579	64	31.4536	31.6002	2.29199	17.0281	0.238297	1.86713	-0.0748274	289.955	0.00255039	0.282628	5027.7	0.517333
material51	256	1061.39	1.83486e+06	1496.13	977.302	73.8383	0.859509	4.1429	6.14391	0.00106361	10.5615	0.281788	0.198036	-0.197198	0.949124	0.982325	0.916145	0.190202	0.0105942	57.8109	6.83358	3575.99	977.302	0.0161486	1248.84	1.40682	1552.68	0.0160238	0.00775943	0.77098	0.904751	0.938061	1187.59	0.00688787	1152.47	2.14759	64	29.4289	28.3472	2.30737	16.9245	0.241424	1.88073	0.0899639	286.438	0.00303225	0.30106	4613.44	0.479948
material61	256	955.922	1.3896e+06	3675.34	799.832	67.5064	0.844337	4.07993	5.82647	0.00163518	10.2774	0.301551	0.220914	-0.205859	0.951568	0.983738	0.920074	0.201077	0.0122107	55.6	6.70572	3190.49	799.832	0.0175178	1147.85	1.54541	1477.72	0.0157039	0.00743693	0.742251	0.885506	0.931028	1090.08	0.00661077	1040.23	2.06985	64	28.2855	26.5784	2.30737	15.4978	0.25866	2.12164	0.165754	240.181	0.00314705	0.309466	4633.48	0.391591
material71	256	1076.14	1.31853e+06	-2254.8	760.68	66.9926	0.838118	4.10186	5.98845	0.00122677	10.3689	0.282557	0.198691	-0.193522	0.944239	0.983739	0.917495	0.186811	0.010334	60.0905	6.70779	3610.39	760.68	0.0176948	1266.85	1.44652	1633	0.0114397	0.00647289	0.761556	0.898577	0.935722	1198.02	0.00600431	1171.34	2.06373	64	30.6581	30.8696	2.30737	15.2133	0.260722	2.18297	-0.10223	231.446	0.00246451	0.302013	4690.79	0.386526
material81	256	1226.73	1.78267e+06	-10797.1	856.559	61.1113	0.866812	4.06124	5.93486	0.000989079	10.407	0.266123	0.178289	-0.192062	0.943637	0.98496	0.91738	0.177933	0.00653595	64.1208	6.72303	4151.06	856.559	0.0185742	1382.05	1.29213	1747.21	0.0124036	0.00749674	0.807457	0.924503	0.948066	1307.09	0.00697323	1314.49	2.06711	64	32.4451	34.6072	2.32275	16.1816	0.267288	2.20213	-0.368017	261.843	0.00196315	0.312812	4599.86	0.422088
material91	256	973.101	1.66987e+06	-8591.16	925.524	44.0092	0.909216	3.83752	5.02477	0.00165323	10.0478	0.293857	0.20518	-0.225766	0.960471	0.989008	0.928641	0.201803	0.0137338	54.8716	6.62579	3253.18	925.524	0.0209272	1110.24	1.38927	1418.95	0.0208473	0.0105783	0.781112	0.90932	0.941242	1046.58	0.00962884	1038.21	2.01658	64	27.7653	31.0311	2.35352	16.3508	0.264179	1.8009	-0.190032	267.349	0.00185924	0.353377	4293.47	0.382176
material101	256	617.84	1.36081e+06	6901.51	876.557	38.2636	0.916347	3.70799	4.4589	0.00366619	9.524	0.334091	0.251243	-0.25781	0.969701	0.990456	0.93649	0.24104	0.0228678	40.4112	6.42968	2031.3	876.557	0.0267767	744.552	1.64235	939.075	0.0393644	0.0150977	0.715561	0.871752	0.922887	704.986	0.0129313	658.409	1.96078	64	20.4616	17.6267	2.43042	15.4857	0.27256	1.85451	0.405087	239.806	0.00265786	0.395373	4172.62	0.315995
material11	128	708.679	2.16468e+06	15696.1	1013.71	165.652	0.719091	4.47152	8.13273	0.00176265	10.1975	0.296419	0.224451	-0.20786	0.951956	0.96512	0.898721	0.209206	0.0137162	44.5719	6.67924	2449.57	1013.71	0.0225493	890.722	1.48217	1073	0.025687	0.0137802	0.737556	0.886988	0.927957	853.188	0.0122997	793.758	2.1285	64	22.1403	17.1038	2.35352	17.4276	0.245674	2.17066	0.640056	303.721	0.00979988	0.173947	9370.29	0.87872
material21	128	999.315	1.52637e+06	-2877.22	866.536	204.758	0.617745	4.875	10.563	0.000669243	10.9824	0.202958	0.126696	-0.123269	0.873965	0.955062	0.867866	0.125435	0.00557325	57.7536	6.77643	3465.21	866.536	0.0175606	1187.12	1.22332	1395.88	0.0138208	0.00915464	0.840776	0.938947	0.95767	1139.34	0.00851607	1119.21	2.17832	64	28.6679	29.2239	2.30737	17.2477	0.23235	1.82729	0.0326118	297.482	0.00584901	0.144421	9903.82	1.02633
material31	128	1039.15	728753	-2715.72	500.998	212.306	0.40535	4.90384	10.8666	0.000728579	10.8075	0.186379	0.108104	-0.0933661	0.808208	0.953787	0.864154	0.109362	0.00277606	62.1926	6.485	3604.33	500.998	0.0198679	1263.82	1.17683	1427.67	0.00856665	0.00602943	0.865619	0.94977	0.96457	1227.08	0.00564908	1185.84	1.96955	64	31.2019	31.8694	2.24585	14.5728	0.29372	2.45361	-0.230323	212.367	0.00485094	0.129976	11071	0.823735
material41	128	1044.23	832112	-1576.3	628.392	242.224	0.444113	5.00632	11.7754	0.000634176	10.9292	0.176615	0.101756	-0.103643	0.835296	0.947838	0.854575	0.101685	0.00313988	61.569	6.59304	3650.75	628.392	0.0176728	1278.41	1.16077	1421.28	0.00742974	0.00569325	0.877652	0.955232	0.967916	1244.51	0.00545127	1202.83	2.0464	64	30.9047	31.0696	2.21509	15.7425	0.262219	1.91244	-0.0738451	247.826	0.00580557	0.122678	11393.9	1.05305
material51	128	922.846	929434	1150.62	669.987	221.944	0.502361	4.90589	10.85	0.000657008	10.9346	0.194786	0.11719	-0.116027	0.860342	0.952551	0.865556	0.120525	0.00244175	56.9504	6.64815	3200.3	669.987	0.0174366	1129.15	1.15219	1281.38	0.00800656	0.00685266	0.873778	0.954373	0.966498	1093.84	0.00662638	1065.93	2.06357	64	28.5897	27.5012	2.23047	15.7688	0.259681	1.95276	0.118883	248.654	0.00638185	0.13546	10424.7	0.919448
material61	128	899.294	874936	3469.79	614.641	218.688	0.475148	4.90712	10.7475	0.00100636	10.734	0.208955	0.134634	-0.119975	0.863773	0.953018	0.866778	0.12733	0.00924758	56.5793	6.57641	3114.93	614.641	0.0188389	1119.01	1.22373	1268.04	0.00965941	0.0072184	0.839946	0.938477	0.957433	1086.41	0.0067928	1036.18	2.06408	64	28.2982	26.0862	2.29199	15.3454	0.262475	2.19064	0.235777	235.481	0.00710265	0.138135	10246.6	0.843663
material71	128	959.361	747340	-1115.17	550.111	201.982	0.46288	4.86415	10.5096	0.000879098	10.7017	0.201898	0.125845	-0.115192	0.854215	0.955758	0.868207	0.123848	0.00870163	59.0704	6.53272	3310.32	550.111	0.0190445	1163.7	1.21877	1346.3	0.00965536	0.00733799	0.847701	0.941315	0.959868	1123.69	0.00702083	1089.3	2.03086	64	29.4922	29.147	2.26123	14.8192	0.26525	2.19484	-0.0523296	219.608	0.00554225	0.139884	9914.54	0.810673
material81	128	1172.45	1.12145e+06	-7803.76	632.471	197.222	0.524611	4.86859	10.6802	0.000737733	10.7338	0.187488	0.110581	-0.115156	0.854906	0.956023	0.865145	0.115058	0.00308518	65.227	6.5869	4071.13	632.471	0.0197338	1347.92	1.15339	1555.38	0.0094902	0.00783297	0.881092	0.956079	0.968899	1300.78	0.00765586	1287.67	2.05803	64	32.1703	34.2534	2.29199	15.9019	0.269556	2.24368	-0.355727	252.872	0.00432783	0.14254	9915.37	0.919358
material91	128	956.321	1.14394e+06	-8631.28	713.782	142.919	0.666352	4.65088	9.17815	0.00096826	10.4022	0.201053	0.119458	-0.154575	0.90826	0.966808	0.880252	0.119277	0.00473306	57.0475	6.55759	3263.02	713.782	0.022136	1090.72	1.17077	1251.23	0.013611	0.0107061	0.87292	0.951791	0.966795	1055.61	0.0102931	1029.2	1.99103	64	27.8535	30.985	2.33813	15.9234	0.272162	1.84893	-0.220185	253.555	0.00379017	0.170604	8704.52	0.772621
material101	128	711.869	1.30285e+06	2326.58	865.325	147.418	0.708875	4.64896	9.01171	0.00159322	9.93938	0.216688	0.136142	-0.22405	0.958457	0.966298	0.883352	0.13436	0.010291	46.1473	6.54928	2433.33	865.325	0.0308109	830.979	1.20745	947.041	0.0190342	0.0135725	0.851187	0.942356	0.960744	804.075	0.0127936	770.976	2.03906	64	22.3639	19.6493	2.52271	16.4672	0.255997	1.82245	0.359365	271.17	0.00550513	0.18965	7726.67	0.767708
material11	200	704.143	2.33617e+06	18665.7	1049.96	73.1518	0.869734	3.92456	5.33969	0.00258136	9.95448	0.367892	0.29958	-0.238978	0.965878	0.982997	0.928435	0.261812	0.0176676	42.8925	6.63872	2364.3	1049.96	0.0211652	848.949	1.85241	1253.94	0.0341967	0.0145165	0.638156	0.832564	0.896189	775.693	0.0126313	759.093	2.09689	64	21.6191	16.7654	2.32275	17.0813	0.251443	2.20317	0.651133	291.769	0.00584807	0.298256	5554.97	0.492671
material21	200	1008.6	1.78249e+06	-1628.67	969.13	96.3107	0.819211	4.32941	7.03816	0.000899699	10.7213	0.265612	0.184434	-0.165587	0.925035	0.97731	0.905917	0.178116	0.00792142	56.2279	6.80597	3411.66	969.13	0.0169138	1161.58	1.33825	1480.1	0.0151843	0.0093464	0.78906	0.914076	0.943001	1097.9	0.0085294	1091.45	2.15669	64	28.2608	28.9701	2.29199	17.1121	0.235519	1.79582	0.0437178	292.823	0.00347948	0.246025	5742.37	0.595425
material31	200	1002.75	1.0348e+06	-4006.9	633.556	103.167	0.719934	4.38451	7.38877	0.000945766	10.603	0.244554	0.159662	-0.132141	0.881539	0.975882	0.901494	0.154438	0.00942379	58.9966	6.60604	3378.33	633.556	0.0194087	1173.3	1.2765	1404.03	0.0140476	0.00761557	0.819519	0.929187	0.951838	1124.61	0.00693751	1095.32	1.97163	64	29.6605	30.2698	2.21509	14.6838	0.288032	2.2973	-0.196306	215.613	0.00318741	0.227309	5824.71	0.500831
material41	200	1076.06	1.39911e+06	-2408.17	838.883	119.963	0.749783	4.50912	8.11139	0.000813443	10.7803	0.231029	0.149083	-0.142523	0.899473	0.972148	0.892998	0.143517	0.008389	59.8777	6.75042	3661.39	838.883	0.016995	1262.65	1.29027	1518.97	0.0150621	0.00744086	0.815646	0.926631	0.950888	1210.59	0.00664432	1179.62	2.09725	64	30.1688	29.8391	2.23047	16.4167	0.251118	1.87739	-0.0396563	269.507	0.00337147	0.216458	6629.85	0.620297
material51	200	991.951	1.54778e+06	1912.69	887.573	110.461	0.778644	4.41343	7.51955	0.000910167	10.7362	0.249147	0.1661	-0.159608	0.919085	0.974511	0.900539	0.160469	0.00990412	56.4862	6.79575	3356.71	887.573	0.0169429	1175.73	1.30478	1374.74	0.0160565	0.00821128	0.811771	0.924487	0.949915	1132.73	0.00732605	1087.12	2.12353	64	28.4823	27.2705	2.26123	16.6107	0.246999	1.91344	0.133	275.917	0.00415148	0.23051	6073.93	0.59905
material61	200	897.96	1.15672e+06	4041.71	721.921	101.481	0.753509	4.35075	7.13199	0.00134654	10.4662	0.267894	0.187613	-0.164103	0.919806	0.976391	0.905189	0.177864	0.0108533	54.5106	6.65855	3011.74	721.921	0.0182422	1081.78	1.43392	1346.7	0.0143818	0.00784456	0.7615	0.90022	0.935257	1030.42	0.00708151	987.53	2.03767	64	27.5017	25.6248	2.27661	15.206	0.265079	2.15952	0.215147	231.224	0.00410119	0.239031	6061.55	0.4853
material71	200	1023.63	1.11565e+06	-1451.33	693.604	100.372	0.747167	4.36913	7.28506	0.00109189	10.5352	0.256584	0.175684	-0.155945	0.911996	0.976397	0.902733	0.169111	0.00968169	59.1717	6.66505	3450.55	693.604	0.0183084	1204.22	1.33675	1498.87	0.00966668	0.00690086	0.792602	0.916086	0.944146	1145.17	0.00651421	1123.08	2.05477	64	29.9483	29.8007	2.27661	15.0405	0.262355	2.18655	-0.0642498	226.216	0.00325078	0.234058	6090.17	0.487356
material81	200	1172.77	1.53748e+06	-9549.36	785.306	90.783	0.792755	4.32968	7.18965	0.00088174	10.5635	0.239242	0.154014	-0.155412	0.911837	0.978238	0.902763	0.155536	0.00461147	63.2182	6.68347	3981.48	785.306	0.0192483	1326.89	1.21593	1590.57	0.0114501	0.00806745	0.842857	0.940349	0.958109	1269.37	0.0076217	1261.07	2.05201	64	31.7034	33.792	2.29199	16.0006	0.269905	2.18652	-0.345557	256.02	0.00253202	0.245104	5942.41	0.527364
material91	200	932.651	1.43079e+06	-8378.35	843.662	62.9578	0.861115	4.08303	6.01121	0.00137448	10.1801	0.265058	0.177175	-0.192824	0.94134	0.984537	0.9165	0.173889	0.00973451	54.313	6.58909	3121.23	843.662	0.0219352	1059.79	1.30786	1292.09	0.0193102	0.011219	0.810798	0.924531	0.949578	1008.71	0.0104126	992.204	1.99091	64	27.1348	30.2928	2.32275	15.9994	0.270784	1.80547	-0.189291	255.98	0.00225344	0.288478	5348.36	0.44829
material101	200	620.646	1.2704e+06	5517.39	850.446	58.0955	0.872113	3.99459	5.55015	0.00274883	9.71327	0.292467	0.207469	-0.230804	0.959528	0.985778	0.922844	0.203015	0.0174434	41.1124	6.44279	2052.43	850.446	0.029807	731.602	1.45744	875.002	0.0328988	0.0157687	0.776499	0.902379	0.941402	700.911	0.014186	658.173	1.95531	64	20.4449	17.2191	2.43042	15.5015	0.273759	1.86062	0.407182	240.297	0.003244	0.321468	5038.8	0.38959
[truncated: 1 more columns]

## Sheet: Matrix_64Levels_ResamplePixel
ROI	Matrix	-333-1AutoCorrelation	-333-1ClusterProminence	-333-1ClusterShade	-333-1ClusterTendendcy	-333-1Contrast	-333-1Correlation	-333-1DifferenceEntropy	-333-1Dissimilarity	-333-1Energy	-333-1Entropy	-333-1Homogeneity	-333-1Homogeneity2	-333-1InformationMeasureCorr1	-333-1InformationMeasureCorr2	-333-1InverseDiffMomentNorm	-333-1InverseDiffNorm	-333-1InverseVariance	-333-1MaxProbability	-333-1SumAverage	-333-1SumEntropy	-333-1SumVariance	-333-1Variance	-333GrayLevelNonuniformity	-333HighGrayLevelRunEmpha	-333LongRunEmphasis	-333LongRunHighGrayLevelEmpha	-333LongRunLowGrayLevelEmpha	-333LowGrayLevelRunEmpha	-333RunLengthNonuniformity	-333RunPercentage	-333ShortRunEmphasis	-333ShortRunHighGrayLevelEmpha	-333ShortRunLowGrayLevelEmpha	EnergyNorm	GlobalEntropy	GlobalMax	GlobalMean	GlobalMedian	GlobalMin	GlobalStd	GlobalUniformity	Kurtosis	Skewness	Variance	Busyness	Coarseness	Complexity	Contrast
material11	512	639.218	2.12066e+06	19382.8	948.216	73.5983	0.855946	3.90644	5.30764	0.00253472	9.64178	0.367064	0.298454	-0.280074	0.978125	0.983001	0.928956	0.268003	0.0157986	41.0153	6.5995	2132.66	948.216	0.0231657	784.569	1.79205	1125.61	0.0287865	0.0138934	0.639534	0.836852	0.895421	727.937	0.0120185	693.003	2.04898	64	20.7208	16.1348	2.4458	16.2426	0.264343	2.44213	0.750734	263.822	0.00610394	0.288139	5794.33	0.475755
material21	512	1036.87	2.03608e+06	-1117.3	1066.51	115.871	0.804004	4.46619	7.77408	0.00107123	10.5385	0.256623	0.177898	-0.192987	0.945901	0.973031	0.897634	0.162163	0.0114143	56.5405	6.81544	3539.09	1066.51	0.0172653	1198.89	1.36034	1531.84	0.0183165	0.00956782	0.783164	0.910995	0.9414	1131.82	0.00857665	1126.22	2.19135	64	28.3638	28.6779	2.35352	17.9412	0.228618	1.68854	0.0741069	321.887	0.00383812	0.21729	6449.81	0.767116
material31	512	1124.55	1.20975e+06	-6164.43	669.638	130.397	0.674031	4.55754	8.37094	0.000908232	10.5622	0.229885	0.147851	-0.149219	0.904497	0.970065	0.890548	0.137669	0.00730193	62.9203	6.63201	3838.01	669.638	0.0193252	1314.11	1.26833	1560.18	0.0130208	0.00699221	0.821774	0.930409	0.952366	1260.8	0.00631447	1229.98	1.99447	64	31.5063	32.823	2.30737	15.4091	0.285995	2.3113	-0.286897	237.44	0.00323965	0.192877	7513.75	0.614701
material41	512	1225.46	1.52656e+06	-3432.54	865.711	153.993	0.697965	4.69317	9.32974	0.000752088	10.7716	0.211131	0.132328	-0.152387	0.911534	0.964798	0.879502	0.129206	0.005743	64.7313	6.78212	4223.82	865.711	0.0167294	1426.92	1.28127	1717.71	0.0110503	0.00607649	0.822357	0.930285	0.952723	1365.55	0.00548139	1345.15	2.18516	64	32.4848	32.6846	2.33813	17.03	0.234725	1.9088	-0.0940328	290.02	0.00376256	0.184839	7724.82	0.786792
material51	512	1100.38	1.5771e+06	-170.059	899.423	139.228	0.731906	4.59987	8.64183	0.00079187	10.7378	0.225703	0.144882	-0.168238	0.927847	0.968255	0.887708	0.142203	0.00619007	60.3435	6.80104	3766.22	899.423	0.0166969	1294.9	1.23508	1503.15	0.0107022	0.00699574	0.825254	0.933716	0.952745	1247.67	0.00633823	1209.56	2.16275	64	30.3306	29.6161	2.33813	17.022	0.23823	1.87543	0.0500644	289.749	0.00418383	0.198704	7022.89	0.735373
material61	512	986.528	1.24364e+06	3337	748.818	127.419	0.709169	4.52137	8.10959	0.00119255	10.4609	0.246613	0.167532	-0.177539	0.932651	0.970842	0.8941	0.158819	0.0108957	57.6603	6.69068	3346.72	748.818	0.0182131	1184.42	1.32189	1393.98	0.0113905	0.00729052	0.796959	0.9179	0.945371	1141.47	0.00673249	1086.97	2.10486	64	28.9693	27.3782	2.33813	15.7437	0.252149	2.12642	0.160738	247.865	0.00447057	0.20428	6976.78	0.611239
material71	512	1083.42	1.1587e+06	-1906.93	700.248	122.408	0.702407	4.50141	8.07277	0.00112164	10.4344	0.241446	0.161978	-0.17694	0.931724	0.971648	0.894004	0.160987	0.0119901	61.285	6.66594	3683.49	700.248	0.0181892	1278.61	1.3119	1555.7	0.0101627	0.00662316	0.79556	0.918453	0.944576	1219.92	0.00617696	1190.56	2.07837	64	30.8837	31.1772	2.33813	15.391	0.25833	2.19113	-0.0961525	236.884	0.0035798	0.201917	7032.37	0.591141
material81	512	1247.03	1.59368e+06	-10474.4	783.347	112.032	0.749759	4.47669	8.07331	0.000882674	10.4911	0.221015	0.138235	-0.171262	0.927332	0.973444	0.892523	0.145222	0.00572519	65.7024	6.69282	4265.48	783.347	0.0193388	1410.01	1.1896	1655.45	0.0108223	0.00759572	0.850729	0.944877	0.960022	1353.99	0.00712675	1340.29	2.08032	64	32.7803	34.9917	2.35352	16.3066	0.265423	2.22293	-0.380855	265.904	0.00279933	0.210736	6942.77	0.635588
material91	512	1063.39	1.67461e+06	-10665.4	895.786	83.512	0.829445	4.2818	7.04222	0.00126247	10.1471	0.237555	0.151513	-0.215629	0.956026	0.979725	0.903927	0.149799	0.00909288	58.6625	6.65272	3600.8	895.786	0.0218225	1201.28	1.23658	1403.56	0.0158567	0.0100454	0.843787	0.939113	0.958932	1155.49	0.00941535	1128.76	2.0647	64	29.1318	32.4308	2.41504	16.743	0.257352	1.83771	-0.231922	280.328	0.00260146	0.243932	5910.46	0.598182
material101	512	775.252	1.63762e+06	3700.7	970.829	81.5818	0.844963	4.24195	6.69757	0.00209945	9.66518	0.260307	0.176446	-0.283615	0.979319	0.980373	0.908894	0.169728	0.0144757	47.0293	6.60724	2604.78	970.829	0.0282651	895.936	1.36555	1080.03	0.0239138	0.0129812	0.775095	0.90864	0.938692	853.502	0.0115795	820.304	2.07786	64	23.1946	22.3948	2.58423	16.8141	0.247165	1.80656	0.31815	282.714	0.00366832	0.268604	5582.47	0.547264
material11	400	642.526	2.12969e+06	19387.2	950.28	75.4235	0.852937	3.91537	5.36177	0.00246144	9.65856	0.363592	0.294418	-0.281903	0.978779	0.982637	0.928388	0.269192	0.014652	41.1734	6.60337	2145.37	950.28	0.023261	782.852	1.80428	1132.89	0.0305338	0.0135845	0.645334	0.837388	0.898381	724.663	0.0117649	694.094	2.05049	64	20.7133	16.0502	2.43042	16.2857	0.263659	2.44425	0.752616	265.225	0.00617599	0.282501	6163.52	0.471645
material21	400	1062.28	2.10683e+06	-1287.23	1084.54	121.635	0.798316	4.49499	7.95655	0.000990783	10.6	0.251174	0.172636	-0.190047	0.944518	0.971867	0.895672	0.163261	0.00784863	57.3256	6.83619	3633.72	1084.54	0.0174948	1228.27	1.33391	1527.39	0.0176635	0.00923344	0.799563	0.918158	0.946518	1166.32	0.00835031	1153.09	2.20114	64	28.715	28.6855	2.3689	18.1304	0.227065	1.68626	0.0724571	328.712	0.00385275	0.211292	6785.15	0.78078
material31	400	1131.4	1.18478e+06	-5925.65	658.107	134.517	0.660579	4.56956	8.47948	0.000905408	10.5715	0.225685	0.143542	-0.146768	0.901499	0.969283	0.889461	0.140776	0.00724816	63.2615	6.62482	3865.83	658.107	0.0193167	1322.9	1.23275	1536.1	0.0109937	0.00691466	0.83276	0.936313	0.955222	1274.63	0.00636751	1237.49	1.99262	64	31.657	32.7153	2.30737	15.3439	0.286367	2.32356	-0.283359	235.434	0.00326868	0.188396	7626.26	0.625727
material41	400	1187.8	1.49777e+06	-3489.73	857.045	153.679	0.69591	4.68568	9.28409	0.000763941	10.7686	0.21091	0.13184	-0.152623	0.911854	0.96494	0.880123	0.133274	0.00597586	63.6226	6.76677	4089.63	857.045	0.0170126	1392.37	1.22142	1595.12	0.0122711	0.00650709	0.848053	0.94123	0.960027	1346.68	0.00582266	1305.5	2.16592	64	31.9151	31.8232	2.30737	16.9426	0.238738	1.89655	-0.0881381	287.05	0.00376445	0.183637	7773.89	0.786794
material51	400	1089.03	1.63266e+06	-276.252	914.722	142.111	0.731066	4.60634	8.6703	0.000836727	10.7276	0.22584	0.144426	-0.170977	0.930294	0.967791	0.887647	0.140603	0.00810647	59.8623	6.81033	3729.23	914.722	0.0170291	1284.69	1.21125	1455.28	0.0119473	0.00754619	0.846401	0.941324	0.95924	1248.77	0.00680526	1196.94	2.15968	64	30.0479	29.2931	2.33813	17.1523	0.23893	1.86483	0.0557985	294.202	0.00441979	0.195012	7109.98	0.760842
material61	400	941.545	1.20459e+06	3144.27	736.829	125.19	0.709544	4.50315	7.99975	0.00129687	10.3881	0.250586	0.171469	-0.177804	0.93192	0.971399	0.895417	0.15843	0.00921136	56.1653	6.67142	3186.47	736.829	0.0186567	1127.18	1.35148	1367.06	0.014675	0.00812058	0.792842	0.91552	0.944468	1081.1	0.00745908	1038.37	2.07514	64	28.1909	26.5938	2.30737	15.6128	0.258053	2.1065	0.166861	243.759	0.0048138	0.203402	6576.74	0.643219
material71	400	1090.63	1.16541e+06	-1698.62	702.241	127.036	0.693623	4.52117	8.21404	0.0011097	10.4616	0.236062	0.155764	-0.172521	0.92806	0.970764	0.892485	0.157424	0.0116295	61.5412	6.67572	3712.46	702.241	0.0186977	1285.43	1.30507	1553.2	0.0102254	0.00625583	0.809034	0.922794	0.949105	1227.97	0.00586673	1199.65	2.0724	64	31.0093	30.6235	2.35352	15.4338	0.259694	2.18551	-0.0837149	238.202	0.00367683	0.19753	7154.68	0.60804
material81	400	1219.44	1.5017e+06	-9780.39	760.937	112.56	0.742278	4.47811	8.06897	0.000915599	10.4518	0.222767	0.140145	-0.169548	0.925097	0.973348	0.89267	0.145616	0.00478927	65.0338	6.6737	4166.84	760.937	0.0197239	1381.71	1.21625	1653.58	0.0106672	0.00752252	0.847315	0.940999	0.959703	1322.94	0.0070746	1313.59	2.07979	64	32.4803	34.6226	2.33813	16.0865	0.263971	2.22803	-0.374998	258.777	0.00296199	0.207089	6819.75	0.650057
material91	400	1062.7	1.62913e+06	-10423.5	877.863	85.2191	0.823029	4.29271	7.12525	0.00124191	10.1643	0.231775	0.14473	-0.214648	0.955648	0.97934	0.902908	0.147406	0.0102553	58.8062	6.65244	3597.88	877.863	0.0215097	1202.53	1.22553	1387.41	0.0155664	0.0093222	0.85328	0.942683	0.961779	1159.05	0.00869858	1130.07	2.03571	64	29.2163	32.2385	2.41504	16.6344	0.263547	1.85464	-0.234641	276.705	0.00267922	0.235959	6303.47	0.591962
material101	400	737.948	1.47404e+06	3347.96	920.32	79.6533	0.840689	4.21942	6.62623	0.00212218	9.64437	0.257469	0.172098	-0.277143	0.97729	0.980805	0.909679	0.169939	0.0149195	45.947	6.56478	2471.28	920.32	0.0290736	857.355	1.34988	1000.2	0.0248127	0.0129742	0.7915	0.914184	0.944247	823.868	0.011369	780.304	2.05387	64	22.6154	21.1951	2.53809	16.4083	0.252315	1.81869	0.32461	269.231	0.00406713	0.268387	5161.2	0.55595
material11	256	653.497	2.24592e+06	20419	971.416	70.4612	0.864744	3.88945	5.21723	0.00249641	9.6297	0.370308	0.301143	-0.288658	0.980398	0.983616	0.929893	0.261973	0.0144132	41.3888	6.61355	2180.73	971.416	0.023625	788.744	1.79752	1157.22	0.0305134	0.0133182	0.649667	0.839229	0.89996	727.204	0.0116024	704.322	2.05267	64	20.8803	16.2886	2.47656	16.3861	0.2645	2.45888	0.757816	268.503	0.0060055	0.299874	5801.74	0.451781
material21	256	1062.29	2.12071e+06	-1234.29	1086.43	110.447	0.815444	4.43208	7.63367	0.00102005	10.569	0.254513	0.175818	-0.195067	0.947745	0.974116	0.898985	0.171531	0.00981476	57.2118	6.83672	3624.07	1086.43	0.0170961	1220.89	1.36602	1567.21	0.0181594	0.00964378	0.787942	0.912591	0.943194	1150.66	0.00879539	1151.22	2.20198	64	28.7231	28.7932	2.3689	18.0658	0.226987	1.69576	0.0658662	326.375	0.0036495	0.226479	6337.3	0.726447
material31	256	1149.02	1.20762e+06	-6702.67	660.061	121.49	0.689106	4.50692	8.1028	0.000965728	10.5286	0.2317	0.148686	-0.153742	0.909369	0.97184	0.893362	0.142712	0.0102314	63.6987	6.61936	3918.11	660.061	0.0193306	1325.9	1.23644	1587.02	0.0101816	0.00693014	0.830559	0.935032	0.954603	1271.77	0.00641389	1249.2	1.98166	64	31.8793	33.2229	2.32275	15.265	0.290473	2.35923	-0.323379	233.019	0.00301877	0.203057	7010.56	0.576563
material41	256	1208.33	1.55785e+06	-4193.3	867.749	140.627	0.721089	4.63041	8.93481	0.000789133	10.7393	0.213873	0.132925	-0.157434	0.916789	0.96751	0.883583	0.128666	0.00708634	64.0797	6.77992	4151.02	867.749	0.0171116	1406.26	1.22989	1629.75	0.0118188	0.00666425	0.84247	0.938365	0.958461	1358.82	0.00593656	1319.58	2.16561	64	32.1365	32.5308	2.32275	16.9396	0.239045	1.91804	-0.114261	286.949	0.00349571	0.195633	7278.12	0.73584
material51	256	1089.7	1.61194e+06	-699.181	908.128	128.393	0.752264	4.54454	8.3099	0.00084807	10.71	0.22829	0.145796	-0.17072	0.929833	0.970448	0.891198	0.142731	0.00884744	59.8254	6.8057	3719.22	908.128	0.0166683	1280.33	1.254	1481.39	0.0133521	0.00753843	0.821056	0.931798	0.95171	1233.36	0.00669054	1192.34	2.13931	64	30.0544	29.3854	2.33813	17.006	0.243363	1.87266	0.0357919	289.203	0.00398755	0.209059	6660.83	0.697618
material61	256	950.618	1.2032e+06	2613.13	736.075	113.525	0.732757	4.44789	7.71117	0.00125151	10.3868	0.251182	0.171281	-0.181799	0.935323	0.97367	0.898151	0.16015	0.00922463	56.3908	6.68485	3206.76	736.075	0.0186879	1143.39	1.43102	1392.26	0.0181225	0.00730958	0.781705	0.907721	0.942097	1094.03	0.00666227	1046.86	2.06492	64	28.4158	27.0629	2.35352	15.4762	0.259039	2.11689	0.132875	239.513	0.00432065	0.217819	6371.59	0.572266
material71	256	1110.86	1.23886e+06	-2582.67	721.81	115.772	0.723559	4.46766	7.90085	0.00105911	10.4481	0.241517	0.160781	-0.178865	0.933589	0.97299	0.895656	0.157393	0.00831969	61.9467	6.69101	3775	721.81	0.018084	1294.4	1.34481	1626.42	0.0103012	0.00662421	0.798735	0.917659	0.946478	1226.92	0.0062045	1216.3	2.08122	64	31.234	31.3926	2.3689	15.5196	0.257841	2.20326	-0.121974	240.858	0.00338143	0.212393	6629.91	0.571832
material81	256	1243.32	1.57548e+06	-10844.8	781.065	103.439	0.766108	4.41763	7.74278	0.000915778	10.4417	0.225079	0.141205	-0.177833	0.932598	0.975352	0.896258	0.151551	0.00442128	65.5413	6.67684	4246.09	781.065	0.0193274	1410.51	1.21646	1655.09	0.0111523	0.00703907	0.849953	0.942159	0.960528	1355.88	0.00654323	1334.45	2.05138	64	32.7599	35.3762	2.35352	16.1678	0.271762	2.22582	-0.405652	261.399	0.00260661	0.221027	6599.71	0.595848
material91	256	1080	1.71615e+06	-11166.7	909.73	77.4228	0.84314	4.22626	6.75371	0.00125913	10.1353	0.243441	0.156404	-0.221569	0.959181	0.981131	0.907395	0.156198	0.00796555	59.0568	6.65951	3655.21	909.73	0.0212822	1216.59	1.25021	1428.1	0.0166941	0.00978503	0.837394	0.936597	0.957093	1166.25	0.00910489	1145.86	2.04289	64	29.3686	33.0229	2.4458	16.8396	0.260636	1.82541	-0.248002	283.573	0.0024179	0.255717	5843.75	0.558225
material101	256	797.901	1.71507e+06	3575.47	1001.86	77.151	0.856997	4.20225	6.52517	0.00207628	9.66765	0.260807	0.17455	-0.28927	0.980805	0.981367	0.91084	0.16416	0.01433	47.6119	6.61553	2682.56	1001.86	0.0272788	924.876	1.32015	1044.84	0.0240365	0.0125176	0.812907	0.92216	0.950866	898.351	0.011075	839.628	2.0967	64	23.4629	21.9487	2.59961	17.0155	0.243935	1.7622	0.301398	289.528	0.00329523	0.283796	5478.2	0.513105
material11	128	588.18	1.88263e+06	18454.7	877.443	55.59	0.880841	3.76106	4.71801	0.00264697	9.53379	0.369753	0.298496	-0.283844	0.978426	0.986792	0.935285	0.280524	0.0129477	39.1263	6.53392	1939.71	877.443	0.0234353	722.933	1.77079	1048.11	0.0283206	0.0129096	0.656746	0.842271	0.902512	666.723	0.0114187	644.263	2.00699	64	20.109	15.7656	2.41504	15.4932	0.271536	2.52874	0.775486	240.041	0.00479086	0.34114	5241.76	0.354738
material21	128	1074.23	2.00833e+06	-1525.17	1038.4	91.9455	0.837321	4.32482	7.10284	0.000944037	10.5191	0.25533	0.173292	-0.205352	0.95394	0.977977	0.904343	0.170685	0.00582121	57.8832	6.83753	3644.05	1038.4	0.0170045	1226.88	1.31635	1589.1	0.0136036	0.00810004	0.803636	0.919695	0.947607	1160.53	0.00739344	1165.05	2.17985	64	29.3051	29.5161	2.39966	17.505	0.23222	1.77744	0.0314101	306.424	0.00309059	0.262087	5395.11	0.585874
material31	128	1102.17	968182	-6499.1	573.527	87.8667	0.734997	4.28436	6.93278	0.00111981	10.2664	0.246114	0.159498	-0.160547	0.912998	0.979027	0.906214	0.164364	0.00396875	62.6339	6.51936	3722.37	573.527	0.0213631	1284.68	1.3053	1593.17	0.0106096	0.00565276	0.821026	0.928098	0.95286	1229.58	0.00523288	1207.01	1.86683	64	31.8424	33.469	2.30737	13.8983	0.322986	2.65485	-0.445739	193.162	0.00226023	0.233905	6336.28	0.416067
material41	128	1141.33	1.18423e+06	-3982.6	741.701	104.69	0.75307	4.42496	7.76354	0.000823401	10.5663	0.222972	0.137426	-0.160247	0.917341	0.975166	0.896083	0.141869	0.00253869	62.6763	6.69481	3875.62	741.701	0.0179364	1327.46	1.28653	1607.71	0.0107854	0.00536499	0.832562	0.933749	0.95611	1267.71	0.00505063	1255.67	2.03206	64	31.9055	32.3154	2.29199	15.4214	0.267335	2.06809	-0.183997	237.82	0.00298257	0.220979	6293.63	0.561738
material51	128	1043.15	1.24411e+06	-677.656	787.073	101.601	0.771485	4.38661	7.44764	0.000838328	10.5873	0.237339	0.151628	-0.173345	0.930601	0.97605	0.900408	0.152145	0.00400875	59.0519	6.73766	3523.85	787.073	0.0174477	1222.11	1.24278	1436.41	0.0103922	0.00603143	0.842336	0.938572	0.958552	1175.94	0.00563754	1148.7	2.05166	64	30.0598	29.7007	2.32275	15.6597	0.261216	1.99028	-0.00144486	245.225	0.00316179	0.240752	5799.27	0.51149
material61	128	978.629	1.08977e+06	2626.37	695.676	98.0099	0.753033	4.36031	7.24819	0.00113284	10.3999	0.252257	0.169509	-0.179111	0.933199	0.976817	0.902969	0.165899	0.00736212	57.5921	6.67715	3288.01	695.676	0.0184215	1163.31	1.32384	1418.2	0.00907144	0.00595124	0.797507	0.917577	0.945652	1111.65	0.00557402	1078.18	2.04559	64	29.2525	27.9165	2.3689	14.9189	0.265209	2.22325	0.120754	222.574	0.00337027	0.247822	5690.77	0.447723
material71	128	1029.07	1.02041e+06	-2961.88	656.197	88.7076	0.76183	4.29726	6.92758	0.00110354	10.2982	0.257055	0.173236	-0.183757	0.935732	0.97883	0.906461	0.166756	0.00831545	59.5716	6.62976	3459.04	656.197	0.0189931	1198.62	1.36756	1546.53	0.00927123	0.00635232	0.785611	0.911509	0.942444	1130.8	0.00608318	1124.52	1.99825	64	30.1866	30.8542	2.33813	14.6081	0.274848	2.24397	-0.162891	213.395	0.00264918	0.25502	5491.84	0.433211
material81	128	1293.43	1.69642e+06	-12700.1	814.016	88.363	0.804156	4.30581	7.07505	0.000977432	10.366	0.240642	0.153918	-0.191955	0.943044	0.97878	0.904149	0.154039	0.00356644	66.6939	6.68806	4414.72	814.016	0.0190428	1445.54	1.21911	1794.96	0.00818211	0.00700227	0.834903	0.937795	0.95558	1371.27	0.00679586	1389.23	2.04606	64	33.5614	36.376	2.39966	16.2179	0.274165	2.25622	-0.461336	263.021	0.002136	0.256971	5675.85	0.515892
material91	128	1089.82	1.72867e+06	-11876.1	926.997	64.6372	0.869635	4.0938	6.09175	0.00136969	9.97277	0.261185	0.172202	-0.240384	0.966671	0.984142	0.915529	0.168192	0.00655391	59.1349	6.63663	3683.06	926.997	0.0213631	1223.34	1.29366	1538.15	0.0138575	0.0089512	0.81093	0.924641	0.949448	1156.77	0.00848162	1161.08	2.04237	64	29.713	33.6843	2.46118	16.6865	0.261213	1.81175	-0.295466	278.44	0.00201621	0.296811	4905.62	0.488164
material101	128	826.24	1.81511e+06	3568.74	1053.45	65.1433	0.883527	4.07904	5.9536	0.00213168	9.58832	0.274891	0.187693	-0.295437	0.981843	0.984123	0.917738	0.180775	0.0116937	48.1316	6.606	2777.83	1053.45	0.0255025	941.916	1.41751	1238.14	0.0225939	0.0119931	0.771618	0.902797	0.938876	880.689	0.0110011	881.983	2.09114	64	24.235	23.1638	2.69189	17.1773	0.242576	1.65949	0.240201	295.06	0.00284051	0.324162	4473.57	0.490037
material11	200	614.018	2.06521e+06	19748.1	922.84	64.4898	0.869367	3.85136	5.03699	0.00255263	9.59168	0.367866	0.297516	-0.28266	0.978503	0.984884	0.931744	0.267708	0.0138084	39.9715	6.56901	2038.57	922.84	0.023608	747.065	1.7832	1080.44	0.0306538	0.0136982	0.652145	0.840479	0.900771	689.946	0.0119917	664.679	2.02588	64	20.2544	15.6887	2.43042	15.9561	0.269591	2.52641	0.787198	254.599	0.00632306	0.316728	5311.27	0.418115
material21	200	995.478	1.87877e+06	-592.234	1017.65	98.3716	0.823712	4.35334	7.21288	0.00103986	10.4849	0.257494	0.176549	-0.19963	0.94988	0.97674	0.903583	0.175671	0.00965118	55.3411	6.80179	3373.71	1017.65	0.0175531	1145.95	1.3618	1478.46	0.0180491	0.00972352	0.784923	0.91152	0.94216	1081.79	0.00879047	1077.1	2.15473	64	27.7928	27.8857	2.33813	17.459	0.234804	1.72148	0.0787794	304.817	0.00333393	0.244938	5954.99	0.622704
material31	200	1099.97	1.09534e+06	-5709.78	627.358	111.765	0.697578	4.44156	7.71636	0.000993706	10.4617	0.239262	0.15515	-0.15627	0.911202	0.973989	0.897791	0.147413	0.00804486	62.3241	6.59361	3733.25	627.358	0.0195042	1272.85	1.24685	1528.47	0.0100416	0.00684326	0.818797	0.931201	0.950827	1217.55	0.00624272	1196.44	1.96297	64	31.241	32.4231	2.29199	14.8507	0.295941	2.4061	-0.305797	220.543	0.00277682	0.217343	6534.14	0.501209
material41	200	1128.1	1.36197e+06	-3480.58	807.675	126.356	0.729452	4.55407	8.44658	0.000833343	10.649	0.218822	0.136484	-0.160855	0.919163	0.970619	0.888871	0.135428	0.00742925	61.8959	6.73635	3850.25	807.675	0.0174253	1313.88	1.22817	1528.49	0.0119395	0.00701264	0.83849	0.93817	0.957021	1266.53	0.00629984	1232.93	2.10897	64	31.0879	31.108	2.27661	16.3278	0.249891	1.94208	-0.101897	266.595	0.00343504	0.209229	6564.45	0.654963
material51	200	1035.52	1.49804e+06	70.9017	870.709	118.017	0.761279	4.48177	7.93533	0.000883865	10.6308	0.234323	0.150419	-0.179488	0.936527	0.972716	0.895348	0.143876	0.00940812	58.2185	6.78827	3515.78	870.709	0.0170566	1217.05	1.28035	1431.46	0.014241	0.00784504	0.822113	0.930343	0.952666	1171.35	0.0071745	1134.32	2.11003	64	29.3082	28.8086	2.30737	16.5973	0.248647	1.90787	0.0592901	275.47	0.0038219	0.221732	6244.97	0.61835
material61	200	949.072	1.25742e+06	3231.11	748.72	109.591	0.744637	4.42066	7.56555	0.00120581	10.3925	0.249166	0.167511	-0.187598	0.940076	0.974562	0.899759	0.162024	0.00793061	56.1886	6.70384	3197.46	748.72	0.0183783	1141.97	1.38205	1351.27	0.0155131	0.00753456	0.794791	0.913777	0.945809	1099.54	0.0069009	1043.65	2.07582	64	28.3252	27.0552	2.33813	15.5385	0.257829	2.15855	0.162827	241.445	0.00419	0.228236	6249.64	0.530519
material71	200	1025.37	1.10717e+06	-1980.36	682.607	102.512	0.738865	4.38678	7.41896	0.00113543	10.3585	0.248374	0.166332	-0.185423	0.937892	0.975892	0.901004	0.163863	0.00908721	59.3414	6.65304	3458.67	682.607	0.0184594	1199.32	1.35817	1536.24	0.0106926	0.00711328	0.787771	0.912674	0.943037	1135.54	0.00672127	1123.59	2.04758	64	29.9755	30.4082	2.33813	15.0058	0.264984	2.21774	-0.0962652	225.173	0.0030897	0.231267	6185.94	0.489837
material81	200	1222.09	1.54445e+06	-10382	774.741	97.2599	0.776928	4.37549	7.46017	0.000964065	10.3782	0.231975	0.146348	-0.184766	0.937604	0.976786	0.899612	0.146628	0.00362091	64.8912	6.67311	4164.09	774.741	0.0197713	1383.48	1.2256	1661.38	0.0102724	0.00695943	0.846534	0.940405	0.95959	1325.43	0.00658791	1314.15	2.03469	64	32.5288	35.0917	2.33813	16.0055	0.275959	2.24091	-0.398352	256.176	0.00245583	0.235605	6186.33	0.548849
material91	200	1028.75	1.61792e+06	-10674.5	891.322	68.1718	0.857901	4.1334	6.28523	0.00142524	9.99671	0.256268	0.167884	-0.229264	0.961718	0.983297	0.913125	0.164108	0.00810062	57.3745	6.61022	3468.34	891.322	0.0224507	1153.36	1.29674	1425.25	0.0176263	0.0103585	0.822579	0.928344	0.953357	1094.57	0.0097155	1090.44	2.01487	64	28.5924	32.6538	2.39966	16.5266	0.266363	1.80489	-0.253401	273.128	0.00217897	0.283227	5247.87	0.502239
material101	200	761.81	1.59668e+06	3546.94	972.386	67.5073	0.870165	4.10375	6.11081	0.00237412	9.56672	0.267049	0.180562	-0.288171	0.979854	0.983556	0.915691	0.184082	0.0168712	46.2857	6.56925	2549.78	972.386	0.0279812	867.232	1.34909	1072.02	0.0240954	0.0129314	0.795139	0.914923	0.945474	826.569	0.0115521	803.322	2.06545	64	22.9374	20.8875	2.58423	16.6608	0.249924	1.74032	0.293049	277.583	0.00327952	0.313686	4404.29	0.508336
[truncated: 1 more columns]

## Sheet: Matrix_FixBinSize
ROI	Matrix	-333-1AutoCorrelation	-333-1ClusterProminence	-333-1ClusterShade	-333-1ClusterTendendcy	-333-1Contrast	-333-1Correlation	-333-1DifferenceEntropy	-333-1Dissimilarity	-333-1Energy	-333-1Entropy	-333-1Homogeneity	-333-1Homogeneity2	-333-1InformationMeasureCorr1	-333-1InformationMeasureCorr2	-333-1InverseDiffMomentNorm	-333-1InverseDiffNorm	-333-1InverseVariance	-333-1MaxProbability	-333-1SumAverage	-333-1SumEntropy	-333-1SumVariance	-333-1Variance	-333GrayLevelNonuniformity	-333HighGrayLevelRunEmpha	-333LongRunEmphasis	-333LongRunHighGrayLevelEmpha	-333LongRunLowGrayLevelEmpha	-333LowGrayLevelRunEmpha	-333RunLengthNonuniformity	-333RunPercentage	-333ShortRunEmphasis	-333ShortRunHighGrayLevelEmpha	-333ShortRunLowGrayLevelEmpha	EnergyNorm	GlobalEntropy	GlobalMax	GlobalMean	GlobalMedian	GlobalMin	GlobalStd	GlobalUniformity	Kurtosis	Skewness	Variance	Busyness	Coarseness	Complexity	Contrast
material11	512	268.961	363439	4905.23	415.438	4.57808	0.9782	2.24919	1.29452	0.0137764	7.53739	0.631998	0.593394	-0.461192	0.99453	0.996897	0.96874	0.347969	0.0712629	25.7873	5.83955	813.35	415.438	0.0263093	96.3212	16.7415	985.508	1.86213	0.0528005	0.151513	0.403238	0.636869	64.762	0.0224954	65.8708	0.947283	19	6.2766	5.00049	0.500977	5.14547	0.536093	2.137	0.612954	26.4759	0.00333497	5.45803	30.1489	0.0257999
material21	512	398.665	314363	-151.85	417.363	6.32799	0.970129	2.55176	1.7726	0.00527063	8.25745	0.519239	0.459778	-0.390493	0.990863	0.995702	0.95725	0.371937	0.0343955	34.4039	6.10206	1218.36	417.363	0.0319271	125.807	7.16909	770.13	0.542985	0.0323997	0.251613	0.53801	0.711292	90.7439	0.0163641	98.3901	0.993005	19	8.43448	8.49805	0.500977	5.22019	0.504841	1.77936	0.008737	27.2504	0.00201455	4.61477	29.4862	0.031692
material31	512	458.483	271048	-1566.27	338.066	7.83358	0.954706	2.67082	2.00699	0.00450789	8.39112	0.480609	0.414252	-0.353134	0.986226	0.994969	0.953075	0.371923	0.0276666	38.7776	6.06914	1407.91	338.066	0.0373046	145.217	5.55527	664.559	0.313678	0.0257457	0.294419	0.585605	0.737199	108.763	0.0151582	113.35	0.949618	19.5	9.51551	10.0023	0.499878	4.77548	0.534514	2.29625	-0.242411	22.8052	0.00195447	4.10256	31.1796	0.0297116
material41	512	478.772	329239	-802.546	415.513	8.67647	0.959092	2.75062	2.14053	0.00416354	8.51123	0.466254	0.396194	-0.357403	0.987617	0.994431	0.950128	0.353059	0.0296117	38.8362	6.15649	1483.48	415.513	0.0354855	150.044	5.42264	642.657	0.352031	0.0249238	0.323828	0.605203	0.759805	114.921	0.0146352	118.492	0.986297	19.5	9.53571	9.49768	0.499878	5.25004	0.509468	1.88169	-0.081068	27.563	0.00206643	4.04728	31.6679	0.036662
material51	512	419.265	315896	591.741	407.843	7.58636	0.963477	2.64546	1.93196	0.00489139	8.38497	0.498075	0.435451	-0.379931	0.990164	0.995132	0.954847	0.372231	0.0342987	35.7324	6.14796	1283.08	407.843	0.0325167	139.889	6.33081	608.613	0.433852	0.0281092	0.274508	0.563919	0.725568	105.256	0.0152088	103.639	0.999714	19.5	8.76342	8.49792	0.499878	5.18094	0.500198	1.88577	0.0860541	26.8422	0.00247544	4.27083	30.0375	0.0337953
material61	512	373.351	238193	1034.55	333.155	6.90237	0.959405	2.59526	1.82692	0.00696115	8.11684	0.516442	0.455878	-0.390948	0.990273	0.995561	0.957167	0.362443	0.0339889	34.1636	6.00965	1125.8	333.155	0.0337305	129.813	7.84058	627.969	0.41519	0.0292468	0.263428	0.542587	0.724572	97.8262	0.0163725	92.1772	0.997951	19.5	8.36802	7.99805	0.499878	4.70679	0.50142	2.12925	0.16643	22.1539	0.00260085	4.40631	30.186	0.0270057
material71	512	420.834	234108	-601.248	324.342	6.88416	0.958432	2.60528	1.8847	0.00544121	8.19523	0.497902	0.433157	-0.380761	0.989349	0.995562	0.955699	0.36377	0.0286325	36.9578	6.03306	1280.68	324.342	0.0361163	136.262	6.58886	688.811	0.282638	0.027399	0.279646	0.565612	0.731149	101.321	0.0155685	104.129	0.989548	19.5	9.07932	8.9978	0.499878	4.65785	0.507228	2.18712	-0.104098	21.6956	0.00199208	4.34872	30.1665	0.0268113
material81	512	469.889	299571	-2705.34	360.617	6.15514	0.966436	2.54122	1.84613	0.00493388	8.18696	0.487931	0.421463	-0.381048	0.989345	0.996015	0.956307	0.380196	0.0293534	39.0524	6.03025	1451.08	360.617	0.0383079	142.763	5.23502	694.753	0.299503	0.0284684	0.288885	0.587718	0.729005	104.273	0.0150015	115.729	0.936388	19.5	9.56569	10.0023	0.499878	4.92211	0.543441	2.20582	-0.368532	24.2272	0.00154002	4.57399	29.4675	0.0282473
material91	512	347.537	233014	-1598.6	352.987	4.19053	0.976535	2.30646	1.50437	0.00901862	7.73199	0.535035	0.479044	-0.421422	0.991912	0.996975	0.962132	0.410572	0.0611278	32.27	5.85335	1050.83	352.987	0.0365153	113.275	6.84861	602.507	0.650606	0.0362001	0.221642	0.526425	0.673811	78.4233	0.0149714	85.168	0.995126	18.5	7.87317	9.00159	0.501343	4.81478	0.503375	1.80535	-0.191305	23.1821	0.00167912	5.03635	25.8785	0.0269614
material101	512	198.539	154893	1699.87	291.909	3.2655	0.977874	2.1555	1.24365	0.0216739	7.11148	0.597308	0.553622	-0.454151	0.99231	0.997367	0.966894	0.402207	0.118077	22.4836	5.52219	579.598	291.909	0.0334371	80.0681	10.5545	432.593	1.4515	0.0517042	0.159227	0.448442	0.615954	55.9919	0.0164421	48.26	0.910306	17.5	5.43707	4.4989	0.499878	4.32431	0.560872	1.85184	0.400465	18.6996	0.00268829	5.42711	25.5103	0.0222226
material11	400	271.673	364797	4861.1	417.245	7.78146	0.963384	2.53824	1.69068	0.0116083	7.85854	0.584675	0.538937	-0.399603	0.990075	0.994807	0.960112	0.340166	0.0653436	26.0236	5.86092	823.779	417.245	0.0313714	95.7436	11.283	666.831	1.26015	0.057354	0.199253	0.465267	0.680758	67.8024	0.0294535	66.1213	0.946922	19	6.26548	5.00049	0.500977	5.1833	0.536337	2.14004	0.619787	26.8666	0.00481627	3.79676	41.9692	0.0375121
material21	400	402.257	314646	-175.419	416.849	10.8	0.949491	2.88456	2.32215	0.00422136	8.61947	0.466079	0.396878	-0.323513	0.98188	0.992764	0.945324	0.330195	0.0308536	34.684	6.11243	1233.18	416.849	0.0357453	126.061	5.06501	542.258	0.387568	0.0352794	0.329441	0.609771	0.763197	96.8881	0.021026	98.922	0.993596	19	8.43241	8.49805	0.500977	5.27424	0.504432	1.77317	0.0201293	27.8176	0.00309058	3.05498	43.8101	0.0487888
material31	400	463.03	267394	-1450.6	334.991	13.4642	0.922721	3.01462	2.63984	0.00346977	8.76323	0.424525	0.347922	-0.284958	0.97244	0.991899	0.941179	0.322258	0.0229227	39.1228	6.081	1426.75	334.991	0.0414879	146.362	3.8931	464.335	0.226408	0.0275213	0.379876	0.661031	0.786306	116.958	0.018583	114.27	0.951694	20	9.53208	10	0.498047	4.83838	0.533108	2.27755	-0.22127	23.4099	0.00269353	2.65303	55.0626	0.0425804
material41	400	482.14	328567	-721.158	415.51	14.8766	0.930869	3.09679	2.80973	0.00326006	8.87714	0.412057	0.333133	-0.290962	0.975365	0.991057	0.937664	0.303857	0.0251127	39.0887	6.16885	1499.23	415.51	0.0387354	151.105	3.91361	464.914	0.260199	0.0271279	0.407362	0.674206	0.804793	122.66	0.018187	119.233	0.987351	20	9.53429	9.50195	0.498047	5.32274	0.508742	1.86926	-0.0645077	28.3315	0.00282625	2.60995	56.0639	0.0527164
material51	400	423.306	315510	633.161	407.196	13.0001	0.938124	2.98335	2.535	0.00388304	8.74235	0.443942	0.371683	-0.314595	0.9807	0.991798	0.942245	0.328039	0.029875	36.042	6.15988	1300.14	407.196	0.0360004	140.485	4.4473	438.768	0.296254	0.0298113	0.350809	0.633998	0.772229	112.41	0.0184361	104.603	0.999745	19.5	8.78558	8.49792	0.499878	5.23615	0.500177	1.88536	0.0987379	27.4173	0.00387518	2.80449	45.0982	0.05254
material61	400	377.054	236963	1112.98	332.097	11.8392	0.931155	2.93108	2.39696	0.00579936	8.45899	0.464227	0.394371	-0.325227	0.981118	0.992504	0.945181	0.320078	0.03162	34.4668	6.0214	1141.24	332.097	0.0376071	130.356	5.58462	453.151	0.300119	0.0310089	0.3403	0.611028	0.774328	104.896	0.0200036	92.9717	0.9976	19.5	8.38299	7.99805	0.499878	4.76426	0.501663	2.12643	0.181704	22.6982	0.00409119	2.90022	44.9678	0.0420044
material71	400	424.974	230034	-494.514	321.154	11.7938	0.929155	2.94444	2.47757	0.00435286	8.54961	0.442689	0.368477	-0.3135	0.978961	0.992502	0.943142	0.320641	0.0248159	37.2899	6.04291	1297.53	321.154	0.0400442	137.321	4.65465	491.688	0.199511	0.0288101	0.358288	0.636034	0.778818	108.538	0.0191375	105.145	0.989651	19.5	9.1127	8.9978	0.499878	4.70151	0.507156	2.17983	-0.0861094	22.1042	0.00314192	2.83369	45.6604	0.0418994
material81	400	474.558	294690	-2622.11	355.77	10.483	0.942755	2.8812	2.4261	0.00380384	8.55659	0.430449	0.352828	-0.312061	0.978644	0.993283	0.94382	0.328361	0.0243681	39.4074	6.04282	1468.97	355.77	0.0428927	144.379	3.6944	490.856	0.208202	0.0299622	0.376254	0.665003	0.780774	113.282	0.0183349	116.628	0.937816	19.5	9.59315	10.0023	0.499878	4.95987	0.54248	2.19688	-0.354415	24.6003	0.00238418	3.01109	43.9998	0.0435964
material91	400	352.17	230702	-1628.04	348.193	7.17514	0.959619	2.63914	1.99378	0.00667052	8.11921	0.472488	0.402744	-0.350274	0.983963	0.994861	0.95077	0.364962	0.0474945	32.6751	5.87993	1066.17	348.193	0.0420844	114.317	4.66799	413.394	0.436808	0.038178	0.310457	0.612481	0.740063	87.202	0.0188569	85.9684	0.99553	18.5	7.91255	9.00159	0.501343	4.83337	0.503095	1.81555	-0.182683	23.3615	0.00246817	3.47863	35.6192	0.0394223
material101	400	201.602	156787	1669.89	292.499	5.58145	0.962551	2.47482	1.6478	0.0173301	7.4815	0.538416	0.482472	-0.385489	0.98586	0.995777	0.958057	0.37528	0.103106	22.7923	5.56136	589.404	292.499	0.0394544	78.8242	7.07911	299.628	0.960252	0.0552115	0.223003	0.523925	0.677468	59.8732	0.0211963	48.7334	0.909874	18	5.45661	4.5	0.500977	4.35444	0.561159	1.88383	0.415541	18.9611	0.00325622	3.99034	37.0284	0.0273772
material11	256	268.209	335966	4416.92	401.086	17.1991	0.917764	3.01765	2.56393	0.00802459	8.3662	0.503876	0.447289	-0.300491	0.973712	0.988375	0.940742	0.319532	0.0501786	26.2478	5.89047	815.508	401.086	0.0414926	91.6449	6.28855	383.781	0.681915	0.06449	0.292642	0.567371	0.746048	70.2541	0.0419707	64.9843	0.924896	18.5	6.19858	4.49854	0.501343	5.15415	0.551148	2.15233	0.628989	26.5653	0.0114183	2.00431	67.2678	0.07833
material21	256	396.871	282208	-402.064	391.282	23.8071	0.885292	3.40153	3.49701	0.00283313	9.13361	0.385054	0.305578	-0.222666	0.947953	0.984578	0.921329	0.266288	0.0231522	34.9286	6.10717	1221.96	391.282	0.0419026	122.842	3.09119	338.403	0.221915	0.0400422	0.439789	0.707736	0.815823	100.033	0.0287565	97.6596	0.994077	19	8.37337	8.49805	0.500977	5.24873	0.5041	1.77012	0.0177904	27.5492	0.00615702	1.52096	88.3064	0.0968926
material31	256	456.277	224893	-1426.82	300.864	29.3004	0.82251	3.53654	3.9462	0.00243531	9.24773	0.346404	0.260285	-0.183124	0.919229	0.982186	0.914196	0.244205	0.0190332	39.415	6.03985	1414.77	300.864	0.0478885	142.44	2.45216	307.812	0.120212	0.0303501	0.507061	0.759709	0.84346	121.416	0.0240107	112.882	0.951436	19.5	9.47788	9.49768	0.499878	4.8014	0.533283	2.28019	-0.238327	23.0534	0.00623872	1.29384	99.5636	0.0953477
material41	256	472.762	283813	-859.154	381.848	32.5487	0.842911	3.62138	4.21538	0.00229331	9.35606	0.333233	0.246619	-0.191127	0.92826	0.98025	0.908933	0.231553	0.021043	39.2651	6.14205	1478.98	381.848	0.0442483	147.319	2.5184	301.1	0.158612	0.0303964	0.535834	0.770501	0.858756	126.643	0.0242362	117.459	0.988817	19.5	9.45843	9.49768	0.499878	5.29146	0.507731	1.86952	-0.0741237	27.9995	0.0067451	1.2598	103.455	0.119493
material51	256	416.089	273407	366.528	377.284	28.5775	0.859177	3.50656	3.81452	0.00263843	9.24672	0.363065	0.280569	-0.21363	0.943664	0.982679	0.917137	0.256411	0.0237834	36.2719	6.14129	1285.14	377.284	0.0420244	135.415	2.75962	280.977	0.176424	0.0335101	0.47978	0.737186	0.833405	115.435	0.0252128	103.268	0.999832	19.5	8.73026	8.49792	0.499878	5.20128	0.500116	1.88214	0.0907956	27.0533	0.00772447	1.38491	92.3834	0.10503
material61	256	369.977	201023	865.634	304.397	25.8063	0.843694	3.44276	3.59419	0.0040336	8.94719	0.384525	0.305305	-0.223596	0.945966	0.983467	0.919695	0.259821	0.0260478	34.66	6.00231	1125.66	304.397	0.0443571	124.878	3.43198	291.776	0.183336	0.0349161	0.455627	0.706826	0.82909	106.392	0.0273325	91.588	0.999951	19	8.32077	8.00171	0.500977	4.7281	0.500034	2.12215	0.165379	22.3549	0.00799172	1.44773	90.998	0.0828269
material71	256	419.032	193492	-536.129	291.38	25.7415	0.837655	3.45801	3.70825	0.0029925	9.04338	0.362191	0.278968	-0.209725	0.937999	0.984173	0.918638	0.256667	0.0195381	37.5565	6.01498	1286.25	291.38	0.0464938	133.556	2.85442	313.029	0.113483	0.0321233	0.485513	0.736831	0.838124	112.598	0.0263812	104.071	0.989733	19.5	9.07568	8.9978	0.499878	4.65895	0.507099	2.18459	-0.10326	21.7058	0.00620056	1.39739	93.6421	0.0834222
material81	256	471.418	255437	-2514.27	324.038	23.2214	0.866259	3.40602	3.64901	0.00252476	9.0631	0.349114	0.261472	-0.208203	0.937193	0.984792	0.917218	0.251504	0.0153467	39.8102	6.02047	1465.79	324.038	0.0496496	141.254	2.35425	321.737	0.121906	0.0342504	0.509007	0.765836	0.842158	117.96	0.0271813	115.701	0.903348	19	9.56394	10.001	0.500977	4.92292	0.565484	2.2046	-0.368117	24.2351	0.00474497	1.48021	90.1151	0.0872855
material91	256	351.002	208768	-1800.32	327.108	15.6539	0.90866	3.14375	2.9841	0.00434766	8.624	0.387793	0.30402	-0.247864	0.955431	0.989023	0.929022	0.289872	0.031322	33.0538	5.87691	1065.69	327.108	0.050646	110.893	2.85795	261.591	0.248318	0.0441509	0.433502	0.718287	0.805331	90.5306	0.028864	85.1855	0.994557	18.5	7.87543	9.00159	0.501343	4.81322	0.503768	1.8044	-0.189778	23.1671	0.00462262	1.82232	66.8221	0.07453
material101	256	201.497	137257	1226.42	278.406	12.216	0.915932	2.96769	2.50114	0.0107368	8.00368	0.44635	0.374254	-0.279651	0.962229	0.990437	0.936964	0.323875	0.0710449	23.2336	5.59374	589.57	278.406	0.052667	74.1093	3.88808	175.83	0.502678	0.0637855	0.338897	0.645166	0.752651	61.0976	0.0334008	48.1949	0.911715	17.5	5.42906	4.4989	0.499878	4.32733	0.559935	1.85182	0.402256	18.7258	0.00649655	2.22945	53.2707	0.054078
material11	128	265.279	291015	3473.55	371.914	60.78	0.71907	3.81599	4.92856	0.00424797	9.0436	0.376483	0.307348	-0.18438	0.916975	0.965767	0.899621	0.266896	0.0284326	27.3858	5.95761	831.08	371.914	0.0547149	93.1794	2.87044	192.684	0.282193	0.0682999	0.452857	0.718248	0.821026	79.1421	0.0530063	67.3995	0.94547	19	6.33226	5.00049	0.500977	5.22648	0.537319	2.16876	0.637501	27.3161	0.0288628	0.698075	222.543	0.208506
material21	128	389.158	223126	-683.929	331.387	78.3976	0.617381	4.2153	6.52525	0.00149867	9.82067	0.270977	0.188142	-0.100639	0.804307	0.956324	0.869843	0.176861	0.00989536	36.106	6.08812	1232.46	331.387	0.0492971	124.429	1.75019	201.25	0.110111	0.0437916	0.625859	0.836	0.88805	110.658	0.0368198	99.5463	0.998535	19.5	8.46735	8.49792	0.499878	5.27844	0.501015	1.82646	0.0317583	27.8619	0.0178242	0.550523	244.98	0.268075
material31	128	450.991	133472	-766.792	214.24	90.7709	0.405429	4.31171	7.10035	0.0015245	9.76525	0.242436	0.156198	-0.06982	0.711912	0.954666	0.865483	0.157893	0.00483241	40.9938	5.87348	1447.68	214.24	0.055006	146.733	1.62222	214.944	0.0740166	0.0288432	0.676643	0.86273	0.906361	134.216	0.0257239	117.408	0.931369	20.5	9.75851	9.99976	0.500488	4.71045	0.546812	2.45702	-0.232468	22.1883	0.0145763	0.46251	321.395	0.233082
material41	128	473.202	166500	-454.563	281.156	108.433	0.443884	4.44838	7.87684	0.00125821	9.93965	0.226865	0.14284	-0.084993	0.765996	0.9489	0.856032	0.139635	0.00405145	41.4739	6.01583	1538.43	281.156	0.0483246	154.661	1.52508	212.139	0.0519018	0.027438	0.701699	0.877408	0.914201	142.788	0.0247394	124.605	0.975847	21	9.87844	9.99756	0.502441	5.1992	0.516648	1.91532	-0.0707047	27.0317	0.0151233	0.422769	398.218	0.286091
material51	128	411.369	180001	327.406	294.921	97.9355	0.501451	4.33657	7.20399	0.00131771	9.93016	0.24828	0.163815	-0.0973391	0.798916	0.95221	0.865155	0.168696	0.00478177	38.059	6.06006	1318.85	294.921	0.047573	136.484	1.58663	194.107	0.066253	0.0328877	0.679774	0.864639	0.907149	125.582	0.0295247	108.334	0.997896	20.5	9.0349	8.49829	0.500488	5.1686	0.501458	1.95391	0.116968	26.7144	0.0197448	0.477348	303.23	0.272269
material61	128	360.236	135972	863.233	242.406	86.3172	0.474836	4.26812	6.74758	0.00225677	9.59254	0.27205	0.190476	-0.0997108	0.796782	0.953112	0.867029	0.173138	0.0168138	35.8449	5.90698	1138.68	242.406	0.0505765	124.711	1.92382	187.425	0.082104	0.0349787	0.625161	0.825586	0.89154	114.085	0.0313065	94.3501	0.997588	19.5	8.46459	7.99805	0.499878	4.76546	0.501671	2.18831	0.237465	22.7096	0.0241955	0.514805	251.748	0.234107
material71	128	406.876	131211	-292.375	230.53	84.7545	0.462362	4.26388	6.80856	0.00177222	9.64606	0.259765	0.176361	-0.095109	0.786356	0.955424	0.867784	0.169438	0.00870163	38.4932	5.90853	1292.29	230.53	0.0517909	133.201	1.71926	203.624	0.0625856	0.0339072	0.644257	0.845284	0.895192	120.24	0.0309976	105.221	0.992227	20	9.09913	8.99902	0.498047	4.73677	0.505378	2.19677	-0.0492474	22.4369	0.0153862	0.507511	295.504	0.212893
material81	128	468.754	173478	-1921.34	248.558	77.6983	0.52372	4.22429	6.69685	0.00161666	9.62324	0.250075	0.164222	-0.0884556	0.768016	0.956188	0.865552	0.163433	0.0056338	41.2814	5.91642	1499.24	248.558	0.0558604	142.731	1.60426	228.366	0.0686401	0.0367335	0.676587	0.862779	0.906221	127.886	0.0340608	117.813	0.937024	19.5	9.66872	10.5022	0.499878	4.93362	0.543013	2.2466	-0.355859	24.3406	0.0130929	0.534523	253.698	0.242528
material91	128	355.753	152363	-1904.99	260.546	52.0736	0.666857	3.95225	5.53332	0.00226212	9.23508	0.272794	0.182554	-0.125719	0.84283	0.967708	0.881919	0.179292	0.01117	34.8502	5.83228	1102.59	260.546	0.0631102	109.241	1.59377	163.86	0.102143	0.0504375	0.671906	0.862948	0.903802	97.9181	0.0458351	86.9925	0.978853	19	8.0229	8.99902	0.500977	4.75828	0.514586	1.85121	-0.2192	22.6412	0.0106797	0.688035	210.869	0.174194
material101	128	204.762	101031	340.221	240.991	41.1913	0.708053	3.7773	4.73847	0.00443136	8.64607	0.317334	0.230987	-0.168063	0.891909	0.966735	0.884744	0.211289	0.0266146	24.8847	5.64407	611.191	240.991	0.0764143	69.0544	1.9798	110.747	0.208645	0.0761287	0.578126	0.806391	0.871102	61.0806	0.0636056	49.8501	0.949452	16.5	5.58869	4.99915	0.499512	4.31741	0.534626	1.82175	0.358708	18.64	0.0184702	0.889314	114.854	0.153855
material11	200	270.986	333590	4328.72	396.869	27.7546	0.869275	3.31678	3.28223	0.00620183	8.6818	0.455358	0.393225	-0.248921	0.956705	0.98283	0.928327	0.301721	0.0358433	26.7363	5.93483	829.569	396.869	0.0462144	93.468	4.61684	284.357	0.486643	0.0662798	0.344231	0.622772	0.77152	74.189	0.0467485	66.2062	0.942188	19	6.26416	5.00049	0.500977	5.19348	0.539534	2.20079	0.648848	26.9722	0.0146721	1.36988	111.549	0.104609
material21	200	399.19	270593	-374.203	377.602	37.6784	0.818541	3.69575	4.40263	0.00214258	9.4531	0.339858	0.257716	-0.171286	0.910962	0.977533	0.906363	0.241485	0.0149375	35.4519	6.12599	1237.61	377.602	0.044495	123.887	2.43905	276.255	0.159019	0.0419672	0.508387	0.759481	0.844439	105.007	0.0322656	98.6716	0.998726	19.5	8.41119	8.49792	0.499878	5.28472	0.500883	1.79723	0.0454157	27.9283	0.00959414	1.04654	124.949	0.142519
material31	200	457.919	210616	-1210.47	285.774	46.634	0.719421	3.8414	4.96538	0.00201762	9.51565	0.306432	0.219131	-0.135667	0.865978	0.976203	0.902176	0.210707	0.0153736	39.9066	6.02734	1433.58	285.774	0.0495041	143.749	2.06328	262.187	0.0959679	0.0315305	0.562386	0.798608	0.864436	125.813	0.0261037	114.075	0.950517	21	9.5056	9.50024	0.502441	4.87056	0.533905	2.30006	-0.195695	23.7224	0.00709899	0.884849	185.573	0.115192
material41	200	475.074	266269	-684.171	366.138	52.4123	0.74956	3.94013	5.35424	0.00178515	9.6594	0.292718	0.205993	-0.145674	0.883803	0.972171	0.893216	0.195628	0.0167392	39.8318	6.14889	1500.68	366.138	0.0450471	149.232	2.10663	258.967	0.132944	0.0312762	0.593381	0.811264	0.878867	132.271	0.0259213	119.182	0.987903	20.5	9.51291	9.49927	0.500488	5.35641	0.508362	1.8783	-0.0394364	28.6911	0.00905457	0.843874	171.417	0.163067
material51	200	416.861	265329	521.73	367.67	45.8457	0.778264	3.81337	4.8383	0.00209479	9.53878	0.318199	0.233093	-0.1654	0.906097	0.974573	0.900812	0.221682	0.019098	36.6827	6.15714	1299.48	367.67	0.0441866	135.901	2.19681	232.805	0.134092	0.0355645	0.554418	0.789403	0.863122	120.278	0.0283249	104.332	0.999927	20	8.7414	8.50098	0.498047	5.28436	0.50005	1.91455	0.131634	27.9245	0.010508	0.937912	154.202	0.143146
material61	200	371.669	191835	1060.51	294.104	41.4624	0.752882	3.74722	4.54874	0.00317395	9.24651	0.340906	0.259733	-0.170577	0.90649	0.976781	0.906173	0.234732	0.0214155	35.1288	6.00702	1142.18	294.104	0.0467897	125.099	2.60936	235.017	0.131018	0.0362979	0.513016	0.755194	0.849644	109.309	0.0298948	92.8963	0.99657	20	8.35931	7.99805	0.498047	4.7981	0.502376	2.15975	0.215639	23.0218	0.0104908	0.988885	152.18	0.112447
material71	200	419.65	181586	-374.796	279.79	40.5222	0.746984	3.75557	4.62273	0.00243527	9.32237	0.32833	0.244672	-0.161272	0.897316	0.977041	0.904125	0.223815	0.0155272	37.9385	6.01232	1299.07	279.79	0.0481101	133.76	2.4009	271.99	0.092443	0.0333464	0.538362	0.774721	0.858772	115.392	0.0287571	104.892	0.989986	20	9.0877	8.99902	0.498047	4.72326	0.506925	2.19009	-0.0656157	22.3092	0.00815575	0.968231	153.948	0.111996
material81	200	472.522	241720	-2383.19	311.378	36.124	0.792094	3.69871	4.52772	0.00209618	9.31645	0.312253	0.22372	-0.160763	0.896588	0.978123	0.902726	0.219838	0.0118732	40.185	6.01674	1478.85	311.378	0.0522	142.479	1.96059	266.126	0.0959527	0.0364204	0.580537	0.810303	0.87119	123.45	0.0310156	116.248	0.936616	19.5	9.56209	10.0023	0.499878	4.98193	0.543287	2.18872	-0.346244	24.8197	0.00697426	1.03485	129.195	0.128011
material91	200	353.704	197898	-1884.98	313.806	23.5717	0.860265	3.41762	3.67212	0.00342529	8.86902	0.348592	0.260819	-0.200588	0.928212	0.984579	0.916788	0.249217	0.0227876	33.5348	5.87577	1078.83	313.806	0.0553124	110.261	2.30631	219.567	0.186318	0.048427	0.507835	0.769316	0.839741	93.2681	0.0367182	85.5112	0.98283	19	7.88664	8.99902	0.500977	4.82893	0.511854	1.81013	-0.187681	23.3186	0.00564247	1.32878	106.652	0.0922417
material101	200	203.869	129212	989.679	271.163	18.5871	0.871703	3.24492	3.12865	0.00784705	8.2685	0.398205	0.318457	-0.234397	0.942703	0.985712	0.923032	0.281674	0.0512401	23.7255	5.62047	598.956	271.163	0.0610358	72.0287	3.05907	144.691	0.383046	0.0699297	0.409466	0.700446	0.793095	61.2319	0.0442169	48.4841	0.909814	17.5	5.44517	4.4989	0.499878	4.34091	0.561198	1.86261	0.404858	18.8435	0.00877238	1.65716	70.444	0.0733758
[truncated: 1 more columns]

## Sheet: Matrix_FixBinSize_ResamplePixel
ROI	Matrix	-333-1AutoCorrelation	-333-1ClusterProminence	-333-1ClusterShade	-333-1ClusterTendendcy	-333-1Contrast	-333-1Correlation	-333-1DifferenceEntropy	-333-1Dissimilarity	-333-1Energy	-333-1Entropy	-333-1Homogeneity	-333-1Homogeneity2	-333-1InformationMeasureCorr1	-333-1InformationMeasureCorr2	-333-1InverseDiffMomentNorm	-333-1InverseDiffNorm	-333-1InverseVariance	-333-1MaxProbability	-333-1SumAverage	-333-1SumEntropy	-333-1SumVariance	-333-1Variance	-333GrayLevelNonuniformity	-333HighGrayLevelRunEmpha	-333LongRunEmphasis	-333LongRunHighGrayLevelEmpha	-333LongRunLowGrayLevelEmpha	-333LowGrayLevelRunEmpha	-333RunLengthNonuniformity	-333RunPercentage	-333ShortRunEmphasis	-333ShortRunHighGrayLevelEmpha	-333ShortRunLowGrayLevelEmpha	EnergyNorm	GlobalEntropy	GlobalMax	GlobalMean	GlobalMedian	GlobalMin	GlobalStd	GlobalUniformity	Kurtosis	Skewness	Variance	Busyness	Coarseness	Complexity	Contrast
material11	512	206.49	210288	3431.39	298.538	23.2693	0.855385	3.18944	2.96302	0.00695771	8.28399	0.477527	0.417685	-0.273778	0.963204	0.983129	0.929801	0.30831	0.0416667	23.4668	5.76087	612.04	298.538	0.0530557	71.2319	4.59601	244.72	0.428028	0.0743	0.320953	0.609725	0.753727	54.7242	0.0533888	50.3347	0.854017	17.5	5.47064	3.99902	0.499878	4.51883	0.597726	2.43939	0.749533	20.4198	0.0230368	1.40958	90.4913	0.0953748
material21	512	383.682	267301	-246.122	386.609	42.1006	0.803594	3.77818	4.67163	0.00254951	9.30596	0.336089	0.25555	-0.181005	0.918199	0.973843	0.899404	0.229138	0.0225501	34.4996	6.08623	1193.93	386.609	0.046029	119.721	2.34976	249.988	0.171885	0.0446922	0.511471	0.764921	0.844212	101.054	0.0341342	95.2247	0.99919	19	8.16375	8.49805	0.500977	5.34723	0.500561	1.6894	0.0749598	28.5929	0.00985033	0.926753	149.655	0.164854
material31	512	443.643	182746	-1494.4	260.154	50.7719	0.673422	3.91131	5.21589	0.00209302	9.41136	0.300578	0.213823	-0.132038	0.857797	0.970498	0.89146	0.198733	0.0150907	39.5625	5.95104	1389.88	260.154	0.0523068	138.705	2.1315	255.789	0.124957	0.0326333	0.575883	0.803399	0.871255	121.088	0.0275842	110.778	0.952941	19.5	9.39215	10.0023	0.499878	4.75142	0.532263	2.31255	-0.28555	22.576	0.00981567	0.770661	172.643	0.154684
material41	512	469.634	216836	-807.7	325.967	58.1198	0.697361	4.02509	5.72206	0.00176382	9.57444	0.281751	0.195105	-0.135142	0.866234	0.964659	0.879519	0.178618	0.0128021	40.1334	6.07593	1485.88	325.967	0.0480629	146.646	1.93387	247.141	0.101969	0.0304924	0.606428	0.821412	0.882516	129.663	0.0253703	118.095	0.968902	19	9.55798	9.5	0.500977	5.17225	0.5214	1.91247	-0.095254	26.7521	0.010837	0.745737	178.596	0.193437
material51	512	417.011	219158	-40.6814	335.577	52.0716	0.731346	3.92677	5.27151	0.00187517	9.53788	0.300478	0.21495	-0.151734	0.889456	0.968386	0.888256	0.204276	0.0154145	37.2094	6.08968	1304.01	335.577	0.0462627	133.833	2.08274	232.41	0.119412	0.0343329	0.581795	0.803899	0.874379	118.43	0.028127	104.778	0.993296	19	8.8503	8.49805	0.500977	5.14418	0.50464	1.8752	0.0500483	26.4626	0.0118312	0.816779	162.327	0.174736
material61	512	363.982	164106	730.274	271.691	46.2662	0.70898	3.83526	4.87457	0.00302229	9.21439	0.326824	0.244443	-0.16296	0.897327	0.971708	0.895889	0.216794	0.0225516	35.0786	5.96068	1119.54	271.691	0.0488639	122.415	2.4243	221.027	0.119896	0.0358387	0.539685	0.773986	0.860014	108.333	0.0301913	91.2841	0.999897	19	8.32391	8.00171	0.500977	4.69118	0.500071	2.12822	0.159782	22.0072	0.0130677	0.859276	155.303	0.137073
material71	512	404.708	155879	-421.784	256.884	44.984	0.701962	3.82486	4.88782	0.00263752	9.22177	0.319459	0.236752	-0.159326	0.893003	0.972186	0.89513	0.222116	0.018054	37.5091	5.94795	1252.99	256.884	0.04974	128.408	2.32043	259.648	0.0899509	0.0338902	0.530393	0.776529	0.852626	109.41	0.0290878	101.399	0.976957	19	8.952	8.99902	0.500977	4.61217	0.515887	2.19385	-0.0969913	21.2721	0.0102184	0.844569	158.837	0.135296
material81	512	464.339	212962	-2314.33	286.46	41.0865	0.749128	3.7891	4.87818	0.00213379	9.2597	0.297925	0.210036	-0.155692	0.889218	0.974024	0.893879	0.212284	0.0127226	40.1495	5.96763	1454.86	286.46	0.0545942	139.343	1.86094	248.462	0.0920821	0.0364084	0.598985	0.822948	0.877457	120.73	0.0315746	114.268	0.900376	19	9.51115	10.001	0.500977	4.88059	0.567449	2.22303	-0.381432	23.8202	0.00777209	0.88681	153.623	0.142648
material91	512	356.43	180774	-1996.36	294.177	27.5817	0.828557	3.5277	4.03984	0.00322646	8.8572	0.326793	0.236703	-0.195217	0.923517	0.980106	0.904975	0.225984	0.0233817	34.0459	5.85453	1088.93	294.177	0.0585013	109.38	2.04518	198.432	0.158655	0.0479752	0.565563	0.803226	0.864691	94.2237	0.0391816	86.2404	0.993678	18	7.97672	9	0.500977	4.75716	0.504376	1.84112	-0.230607	22.6306	0.00717491	1.12542	109.782	0.117742
material101	512	210.583	112575	471.116	254.962	21.5391	0.844202	3.35555	3.42175	0.00625886	8.27656	0.378598	0.294876	-0.243354	0.948196	0.980516	0.909868	0.25122	0.0426448	24.6761	5.65165	616.889	254.962	0.06325	71.4082	2.83576	145.543	0.332993	0.0698212	0.45379	0.728754	0.816852	60.6767	0.050299	50.1314	0.917823	16	5.64377	5.5	0.5	4.27846	0.555871	1.80289	0.313371	18.3052	0.0115601	1.42088	69.0263	0.0940565
material11	400	208.906	214139	3460.03	301.29	23.9628	0.852656	3.2037	3.01395	0.00704771	8.31275	0.470881	0.4113	-0.270682	0.9623	0.982667	0.928734	0.319386	0.0418629	23.6283	5.77101	620.172	301.29	0.0526994	72.6313	4.42089	234.384	0.424355	0.0728416	0.33469	0.619078	0.763357	56.8144	0.051965	50.7766	0.848951	17.5	5.49079	3.99902	0.499878	4.54324	0.600991	2.44501	0.750662	20.641	0.0260429	1.38298	91.8453	0.097973
material21	400	387.144	270222	-291.404	388.496	43.7516	0.797565	3.80774	4.76664	0.00246119	9.36223	0.331653	0.249734	-0.17401	0.912243	0.971599	0.895401	0.21902	0.0224247	34.6963	6.09405	1206.58	388.496	0.0464317	121.526	2.22936	243.913	0.15704	0.0445014	0.534528	0.777895	0.854553	104.693	0.0339973	96.0849	0.999993	18.5	8.19927	7.9989	0.501343	5.37328	0.500005	1.68585	0.0709091	28.8721	0.012245	0.896379	132.086	0.191217
material31	400	448.529	180158	-1431.99	256.951	52.7086	0.659572	3.9303	5.30098	0.00211091	9.4289	0.297519	0.210838	-0.128015	0.851316	0.969542	0.890087	0.199122	0.0159705	39.8732	5.94407	1408.14	256.951	0.0525674	140.972	1.99656	251.956	0.0942555	0.0315611	0.573548	0.807318	0.868068	123.392	0.026166	112.073	0.947847	19.5	9.46465	10.0023	0.499878	4.74384	0.535712	2.32117	-0.281337	22.504	0.0099993	0.748022	175.571	0.159117
material41	400	469.368	226943	-859.087	333.687	59.9281	0.695505	4.04288	5.78702	0.00176633	9.61177	0.279874	0.193427	-0.135551	0.86785	0.965399	0.881095	0.18117	0.0152982	40.0464	6.08396	1487.13	333.687	0.0474041	146.029	1.83723	242.686	0.0880507	0.0308766	0.622954	0.83047	0.888627	129.49	0.026001	118.229	0.985969	19.5	9.53367	9.49768	0.499878	5.2298	0.509694	1.89839	-0.0900366	27.3508	0.0112528	0.727159	181.489	0.201936
material51	400	415.62	228898	-47.1807	342.699	53.3405	0.730634	3.93181	5.31071	0.00196484	9.53922	0.29754	0.211791	-0.153443	0.891728	0.967805	0.887723	0.208453	0.0176649	37.0557	6.10092	1300.89	342.699	0.0458554	134.366	2.01985	225.251	0.108241	0.0350087	0.57937	0.805023	0.872466	119.519	0.0281309	104.444	0.994564	19	8.80033	8.49805	0.500977	5.19716	0.503763	1.86642	0.0577678	27.0105	0.012548	0.797875	162.92	0.181834
material61	400	363.849	173372	745.272	279.533	47.5476	0.709262	3.84398	4.92101	0.00304853	9.20932	0.325267	0.243389	-0.164987	0.899604	0.97112	0.895183	0.220118	0.0222082	34.9773	5.97634	1120.59	279.533	0.0487426	122.599	2.43462	221.142	0.135128	0.0362423	0.537196	0.773137	0.8587	108.414	0.0299076	91.259	0.99998	19	8.28528	8.00171	0.500977	4.75644	0.500014	2.11149	0.169545	22.6238	0.0135853	0.836374	159.997	0.144862
material71	400	408.111	157783	-376.387	258.322	46.8106	0.69318	3.84304	4.97508	0.00255144	9.24021	0.315044	0.231837	-0.157984	0.891682	0.971258	0.893628	0.220203	0.0160598	37.6953	5.95327	1265.88	258.322	0.0498548	129.586	2.26131	260.206	0.0843015	0.0338082	0.54994	0.783876	0.862511	111.619	0.0297492	102.452	0.975767	19	8.99982	8.99902	0.500977	4.63324	0.516703	2.18795	-0.0857215	21.4669	0.0105651	0.816906	161.602	0.140334
material81	400	468.088	213209	-2247.8	286.161	42.4034	0.741887	3.81467	4.9446	0.00212984	9.26795	0.299821	0.211486	-0.154786	0.888137	0.973283	0.892752	0.198123	0.0127714	40.3558	5.97077	1468.49	286.161	0.0533698	140.334	1.86344	256.728	0.0837889	0.0367452	0.591356	0.819988	0.873979	121.097	0.0323875	115.413	0.904041	19	9.56782	10.001	0.500977	4.88719	0.565026	2.23547	-0.37619	23.8847	0.00805911	0.85585	158.712	0.148326
material91	400	360.589	180651	-1999.92	292.255	28.4421	0.822623	3.54684	4.10212	0.00309719	8.90427	0.323819	0.233028	-0.192417	0.921856	0.979528	0.903727	0.220082	0.0226926	34.3299	5.8657	1102.47	292.255	0.0587698	110.306	2.0403	196.965	0.159798	0.0479446	0.574919	0.806911	0.869194	94.6079	0.0408129	87.3417	0.989813	18	8.04813	9	0.500977	4.75264	0.507045	1.85793	-0.235707	22.5876	0.00756808	1.07591	113.804	0.123119
material101	400	212.256	114949	505.6	256.787	22.2477	0.840538	3.36773	3.47821	0.00602216	8.33538	0.371226	0.287209	-0.238083	0.945994	0.981056	0.910942	0.259533	0.0443659	24.7888	5.65841	622.758	256.787	0.0638866	72.1574	2.56489	133.437	0.292832	0.0689235	0.465373	0.743262	0.819267	61.7021	0.0491667	50.4871	0.942918	16.5	5.66005	5.49866	0.499512	4.29851	0.539041	1.82203	0.326527	18.4772	0.0120863	1.38849	69.2399	0.0973129
material11	256	203.21	205986	3407.95	293.936	21.4027	0.864258	3.14066	2.86462	0.0071765	8.23431	0.478395	0.419633	-0.279076	0.964788	0.983458	0.929925	0.324689	0.0411805	23.2445	5.74936	600.016	293.936	0.0531449	70.0192	4.59513	238.618	0.438093	0.0740989	0.3233	0.609286	0.75637	53.8516	0.0525925	49.3125	0.876687	17	5.41503	4.00098	0.498047	4.47242	0.583009	2.46965	0.75971	20.0026	0.0209263	1.53366	84.3107	0.0857436
material21	256	379.207	260320	-267.762	380.666	38.8204	0.814917	3.73118	4.51548	0.0026039	9.28199	0.339827	0.258243	-0.183225	0.919942	0.974415	0.899821	0.227057	0.024606	34.278	6.07897	1175.85	380.666	0.0465663	116.929	2.38244	259.774	0.167468	0.0454036	0.513992	0.764568	0.8462	98.4516	0.0347816	93.8428	0.999868	18.5	8.11553	7.9989	0.501343	5.29108	0.500091	1.69615	0.0654622	27.9956	0.0109869	0.990545	120.245	0.168023
material31	256	441.625	171351	-1548.03	248.788	45.8493	0.688775	3.83651	4.97162	0.00222838	9.33838	0.304887	0.217624	-0.134874	0.860897	0.971725	0.893318	0.210439	0.016078	39.5419	5.91669	1379.44	248.788	0.0540876	136.836	1.962	248.231	0.090462	0.0314107	0.575818	0.809458	0.868586	119.281	0.0259861	109.632	0.902897	19	9.38778	10.001	0.500977	4.63807	0.565782	2.36129	-0.3267	21.5117	0.00864483	0.836293	157.71	0.13708
material41	256	460.51	218729	-963.455	324.989	52.763	0.720656	3.95771	5.45719	0.00190996	9.52831	0.288038	0.201298	-0.142438	0.876442	0.967548	0.88405	0.189115	0.0174796	39.6209	6.06666	1450.88	324.989	0.048266	143.234	1.85838	242.419	0.0871264	0.03138	0.60434	0.823135	0.880526	126.482	0.0258325	115.259	0.972598	19	9.43102	9.5	0.500977	5.13097	0.518873	1.92066	-0.11526	26.3269	0.0101223	0.801055	164.061	0.176034
material51	256	408.906	219028	-147.633	334.651	47.3598	0.752052	3.86235	5.03551	0.00208535	9.47149	0.305778	0.21914	-0.158802	0.897144	0.97093	0.892311	0.207703	0.019847	36.7196	6.08111	1273.37	334.651	0.0469986	131.02	2	221.177	0.110765	0.0353137	0.581653	0.807136	0.872964	116.291	0.0285492	102.247	0.99325	19	8.72773	8.49805	0.500977	5.10745	0.504671	1.87416	0.0369339	26.0861	0.0110022	0.878226	148.274	0.159136
material61	256	355.866	162954	557.747	270.609	41.8975	0.731861	3.77368	4.67489	0.00306142	9.15161	0.32934	0.245731	-0.170087	0.904243	0.974082	0.899153	0.218132	0.0194465	34.5652	5.95951	1088.89	270.609	0.0491671	119.525	2.45519	219.193	0.138338	0.0362641	0.536018	0.769539	0.859195	105.345	0.030224	89.0575	0.999856	19	8.21453	8.00171	0.500977	4.64642	0.5001	2.12111	0.130584	21.5892	0.0116161	0.920136	146.519	0.124746
material71	256	399.045	154453	-527.35	254.719	40.9639	0.722922	3.76241	4.6949	0.00263	9.17048	0.322457	0.238988	-0.16478	0.898547	0.973138	0.896078	0.226596	0.0156847	37.181	5.94428	1230.45	254.719	0.0505281	126.105	2.23737	251.827	0.0873067	0.0345164	0.535378	0.778871	0.854819	107.355	0.0298495	99.6671	0.99137	18.5	8.88016	9.00159	0.501343	4.56296	0.50597	2.20632	-0.118157	20.8206	0.0105525	0.912687	126.266	0.135791
material81	256	459.587	208630	-2383.41	283.998	37.7003	0.765617	3.72832	4.65593	0.00223909	9.19319	0.306208	0.217648	-0.164203	0.89829	0.976039	0.898041	0.215956	0.0124743	39.9005	5.94967	1436.66	283.998	0.0538866	138.253	1.89794	255.383	0.0885592	0.0368631	0.57582	0.812165	0.867405	118.515	0.0320812	113.004	0.905905	19	9.47177	10.502	0.500977	4.82737	0.563791	2.22676	-0.405259	23.3035	0.0070713	0.94673	144.596	0.131116
material91	256	354.583	177280	-2037.04	292.326	24.9492	0.842728	3.45841	3.81163	0.0033864	8.77258	0.340252	0.251808	-0.206	0.930944	0.980941	0.907579	0.240783	0.0228202	33.9257	5.84041	1081.11	292.326	0.0580206	107.196	2.08435	210.673	0.143038	0.0493201	0.540786	0.789727	0.853838	90.2465	0.0407947	85.5859	0.98837	17.5	7.95615	9.00208	0.499878	4.72266	0.50804	1.82912	-0.249998	22.3035	0.00743576	1.2217	88.4907	0.120121
material101	256	208.58	110107	459.268	253.772	19.6634	0.856175	3.28723	3.27304	0.00658704	8.25447	0.38051	0.296873	-0.241737	0.946959	0.981044	0.910775	0.269511	0.0484121	24.4992	5.63522	609.623	253.772	0.0639488	70.3133	2.73543	145.303	0.310493	0.0701342	0.466138	0.734222	0.824441	59.9353	0.0511553	49.4783	0.920155	15.5	5.60439	4.9989	0.499512	4.25376	0.554316	1.76468	0.30197	18.0945	0.0123174	1.56026	53.4663	0.0956904
material11	128	196.363	198818	3412.26	285.2	18.205	0.879997	3.0708	2.68993	0.00717687	8.18048	0.477307	0.416678	-0.282866	0.965654	0.987134	0.936379	0.332646	0.0341349	22.7696	5.72527	575.711	285.2	0.0504976	69.7132	4.75909	243.928	0.443583	0.0706322	0.305	0.598423	0.742101	53.2113	0.0485936	48.2566	0.844212	18	5.39322	3.99902	0.500977	4.37971	0.604037	2.528	0.772847	19.1818	0.0138274	1.75514	86.2233	0.0645339
material21	128	373.715	233873	-314.155	354.517	31.432	0.837126	3.59948	4.14387	0.00242935	9.19087	0.343465	0.260379	-0.196464	0.930097	0.977688	0.904039	0.242896	0.0162162	34.2312	6.06613	1147.79	354.517	0.0460383	116.104	2.45881	265.535	0.161737	0.041244	0.505881	0.757504	0.843446	97.856	0.031374	92.5806	1	18	8.1825	7.99805	0.500977	5.06367	0.5	1.77773	0.02946	25.6408	0.00886661	1.21792	97.4506	0.125488
material31	128	435.171	145963	-1562.14	222.813	34.2704	0.734104	3.64195	4.31849	0.00261049	9.10017	0.323721	0.236076	-0.148292	0.876069	0.979305	0.907069	0.236321	0.00818554	39.3972	5.84092	1348.84	222.813	0.0555695	136.515	2.32938	278.297	0.122576	0.0276847	0.530573	0.778382	0.851927	116.497	0.0235934	108.729	0.909711	19.5	9.50611	10.0023	0.499878	4.28621	0.561267	2.65105	-0.441674	18.3716	0.00633667	0.982997	137.319	0.0999349
material41	128	457.984	184774	-988.648	293.106	41.5108	0.752323	3.79005	4.87802	0.00187572	9.38671	0.295716	0.205623	-0.1525	0.887713	0.975117	0.896264	0.203905	0.00568182	39.7535	6.02592	1430.66	293.106	0.0493486	142.355	2.04863	265.34	0.097517	0.0275404	0.580018	0.807018	0.872292	123.291	0.0237021	115.219	0.972966	19.5	9.60576	9.49768	0.499878	4.79161	0.518621	2.06924	-0.184557	22.9595	0.00818457	0.907661	145.972	0.136763
material51	128	406.204	181438	-156.263	300.824	38.8673	0.77131	3.72659	4.60617	0.00195574	9.3795	0.311518	0.223322	-0.165607	0.903473	0.976761	0.901828	0.22627	0.00753158	36.9169	6.04602	1253.84	300.824	0.0478142	129.138	2.15035	238.409	0.112117	0.0308503	0.567363	0.795549	0.868734	112.298	0.0264192	101.953	0.995977	19.5	8.88844	8.9978	0.499878	4.79159	0.502786	1.98862	-0.00196485	22.9594	0.00869535	1.03191	125.403	0.119657
material61	128	350.138	133803	547.576	243.777	34.412	0.752608	3.65182	4.29249	0.00278478	9.11171	0.335863	0.251258	-0.167509	0.900645	0.977109	0.903621	0.236111	0.0145995	34.5136	5.92328	1061.18	243.777	0.0507854	115.226	2.39864	223.6	0.109645	0.0336659	0.536383	0.771021	0.858606	100.188	0.0291619	87.5443	0.996668	18.5	8.27239	7.9989	0.501343	4.37275	0.502307	2.22564	0.124642	19.1209	0.0106788	1.11166	103.393	0.102419
material71	128	385.189	137938	-656.105	241.199	32.7214	0.761091	3.62037	4.20131	0.00269352	9.06148	0.337648	0.252912	-0.174642	0.907457	0.979182	0.907343	0.239544	0.0159603	36.5004	5.91402	1176.73	241.199	0.0505462	121.031	2.72122	286.223	0.10334	0.035005	0.510163	0.753197	0.848724	101.57	0.030826	95.8068	0.973864	19	8.75197	8.99902	0.500977	4.38403	0.518006	2.24892	-0.162036	19.2197	0.0069589	1.13387	120.198	0.0908637
material81	128	446.182	194195	-2502.98	275.581	30.025	0.803505	3.56728	4.11149	0.00257908	9.01265	0.329023	0.241216	-0.181781	0.913832	0.978627	0.904182	0.240445	0.00728795	39.2323	5.90618	1386.21	275.581	0.0537449	133.74	2.18804	291.859	0.0968331	0.035747	0.535511	0.783903	0.852868	112.59	0.0298814	109.682	0.924457	18	9.37392	10.002	0.500977	4.67164	0.551442	2.2538	-0.461003	21.8242	0.00596459	1.19004	102.436	0.109291
material91	128	341.186	161526	-2007.64	283.398	19.8262	0.869231	3.28978	3.3666	0.00382239	8.56831	0.360535	0.274181	-0.227565	0.942992	0.984704	0.917124	0.276726	0.0150106	33.1839	5.78578	1034.06	283.398	0.0577374	104.546	2.337	225.99	0.159993	0.0474119	0.496307	0.761962	0.83458	86.0824	0.0370378	82.8257	0.990467	17.5	7.86674	9.00208	0.499878	4.57787	0.506593	1.81283	-0.296762	20.9569	0.00552325	1.51911	73.5392	0.0912232
material101	128	197.275	95714.7	401.089	241.839	15.1479	0.882112	3.10303	2.85817	0.00712641	8.01969	0.404493	0.325302	-0.259338	0.953107	0.98422	0.918412	0.310457	0.0354583	23.7152	5.55755	571.539	241.839	0.0604416	67.0183	3.21421	169.901	0.366595	0.0674953	0.390377	0.688811	0.780666	54.3121	0.0435201	47.5055	0.938665	15	5.54226	5.50049	0.501709	4.10029	0.541908	1.66384	0.242602	16.8124	0.00852261	1.93519	45.2513	0.0720779
material11	200	202.357	212313	3573.92	296.138	20.8737	0.86831	3.14453	2.85152	0.00710783	8.22679	0.475028	0.414533	-0.280517	0.965271	0.984662	0.931705	0.319264	0.0385271	23.112	5.74467	597.762	296.138	0.0536182	69.9402	4.58587	235.884	0.429663	0.0746517	0.321516	0.611286	0.753395	53.5176	0.0530521	49.2604	0.840359	17.5	5.40108	3.99902	0.499878	4.48346	0.606509	2.52022	0.78389	20.1014	0.0206251	1.59585	79.7747	0.0827141
material21	200	380.336	264394	-135.136	381.77	37.0117	0.823243	3.69721	4.41886	0.00252429	9.27545	0.337867	0.254709	-0.188452	0.924595	0.976696	0.903673	0.230375	0.0213705	34.3014	6.09181	1177.55	381.77	0.0461063	117.476	2.41017	266.639	0.169349	0.0453766	0.519067	0.765439	0.849359	99.6474	0.0347464	93.8846	0.998596	19	8.11789	8.00171	0.500977	5.29141	0.500973	1.72296	0.0787463	27.999	0.0088936	1.06015	129.124	0.139583
material31	200	443.506	171886	-1407.27	248.902	44.5486	0.696383	3.81255	4.86921	0.00222439	9.32062	0.309547	0.2221	-0.14276	0.872615	0.973804	0.897553	0.21242	0.0119454	39.6191	5.93039	1383.83	248.902	0.0525594	138.585	2.05391	252.595	0.0944545	0.0313905	0.567377	0.802347	0.866108	121.127	0.0262422	110.076	0.934663	19.5	9.41681	10.0023	0.499878	4.62702	0.544601	2.4041	-0.303747	21.4093	0.00805613	0.883427	146.44	0.127041
material41	200	463.184	223853	-874.134	327.743	51.3508	0.7291	3.93802	5.37205	0.00184799	9.53328	0.288257	0.200038	-0.149405	0.886351	0.971238	0.890282	0.186338	0.0152123	39.7032	6.08448	1457.96	327.743	0.04837	143.415	1.84532	244.262	0.0856705	0.0310613	0.621514	0.828348	0.888422	127.627	0.0260164	115.824	0.98292	20	9.45779	9.50195	0.498047	5.13668	0.511792	1.94112	-0.100227	26.3855	0.00860367	0.837494	176.362	0.151411
material51	200	409.806	226589	15.598	338.727	46.0513	0.760639	3.83998	4.95498	0.00206155	9.46406	0.307035	0.219681	-0.166614	0.906124	0.973035	0.896018	0.208198	0.0181017	36.6954	6.10212	1274.67	338.727	0.0464278	131.371	2.04208	223.617	0.116817	0.0354745	0.576539	0.803652	0.871207	116.361	0.029101	102.513	0.998812	19.5	8.73418	8.49792	0.499878	5.12242	0.500823	1.90833	0.0570254	26.2392	0.0110897	0.916978	137.973	0.151732
material61	200	356.463	171555	733.318	276.313	40.5218	0.744209	3.74771	4.59517	0.00293184	9.16448	0.328767	0.245111	-0.177703	0.912505	0.974904	0.90057	0.228129	0.0173482	34.4973	5.985	1089.26	276.313	0.0486623	118.408	2.46736	222.854	0.142661	0.0373412	0.531792	0.768041	0.857011	103.656	0.0316458	89.1212	0.999969	19	8.20319	8.00171	0.500977	4.67323	0.500022	2.16253	0.16346	21.8391	0.0117152	0.977678	136.069	0.118715
material71	200	399	161631	-474.108	260.72	39.2672	0.738209	3.73801	4.5885	0.00256056	9.19619	0.32451	0.239699	-0.170315	0.905288	0.976579	0.902435	0.224685	0.0165469	37.0749	5.96489	1228.55	260.72	0.0498	126.732	2.45655	271.222	0.0997532	0.0350973	0.535086	0.770737	0.858225	109.087	0.0303954	99.4925	0.991459	19.5	8.85595	8.9978	0.499878	4.59079	0.505909	2.2199	-0.097486	21.0754	0.00890047	0.97648	134.169	0.115499
material81	200	459.228	210043	-2352.88	285.532	35.8253	0.777038	3.69151	4.51417	0.00225841	9.17532	0.312341	0.223588	-0.169955	0.904508	0.977198	0.900797	0.219757	0.00991814	39.8397	5.95295	1433.85	285.532	0.054408	138.395	1.95359	261.011	0.0851568	0.0369438	0.57561	0.808999	0.868594	119.45	0.0321311	112.963	0.897809	19	9.47747	10.2515	0.500977	4.8119	0.569144	2.24476	-0.401723	23.1544	0.00657845	1.02387	133.023	0.120964
material91	200	351.098	180180	-2065.56	297.305	22.8224	0.857417	3.39684	3.62353	0.00378492	8.67586	0.351901	0.263354	-0.215573	0.936564	0.983402	0.913759	0.241994	0.0249414	33.6142	5.82316	1069.64	297.305	0.0588068	107.52	2.1659	212.413	0.153892	0.0497808	0.533056	0.782245	0.851781	91.2027	0.0403729	84.6646	0.986744	18	7.89388	9	0.500977	4.7296	0.50916	1.8091	-0.252948	22.3691	0.0057505	1.36996	93.3452	0.0959251
material101	200	205.002	107940	472.881	252.838	17.6047	0.869809	3.21396	3.10391	0.00695153	8.14765	0.388901	0.305957	-0.253889	0.952096	0.98388	0.916986	0.279704	0.0463957	24.1821	5.60864	597.813	252.838	0.0644928	68.3948	2.74324	148.249	0.309384	0.0706526	0.437706	0.722455	0.80686	56.9435	0.0494853	48.6454	0.925112	16	5.553	5	0.5	4.22309	0.551004	1.7403	0.292204	17.8345	0.00879553	1.74267	58.2278	0.074244
[truncated: 1 more columns]

## Sheet: Recon_64Levels
ROI	Recon	-333-1AutoCorrelation	-333-1ClusterProminence	-333-1ClusterShade	-333-1ClusterTendendcy	-333-1Contrast	-333-1Correlation	-333-1DifferenceEntropy	-333-1Dissimilarity	-333-1Energy	-333-1Entropy	-333-1Homogeneity	-333-1Homogeneity2	-333-1InformationMeasureCorr1	-333-1InformationMeasureCorr2	-333-1InverseDiffMomentNorm	-333-1InverseDiffNorm	-333-1InverseVariance	-333-1MaxProbability	-333-1SumAverage	-333-1SumEntropy	-333-1SumVariance	-333-1Variance	-333GrayLevelNonuniformity	-333HighGrayLevelRunEmpha	-333LongRunEmphasis	-333LongRunHighGrayLevelEmpha	-333LongRunLowGrayLevelEmpha	-333LowGrayLevelRunEmpha	-333RunLengthNonuniformity	-333RunPercentage	-333ShortRunEmphasis	-333ShortRunHighGrayLevelEmpha	-333ShortRunLowGrayLevelEmpha	EnergyNorm	GlobalEntropy	GlobalMax	GlobalMean	GlobalMedian	GlobalMin	GlobalStd	GlobalUniformity	Kurtosis	Skewness	Variance	Busyness	Coarseness	Complexity	Contrast
material11	BACKPROJTOF	634.113	2.1532e+06	17189.5	976.79	51.7392	0.899392	3.73921	4.59909	0.00515011	9.63868	0.391123	0.324544	-0.261929	0.972263	0.987492	0.936615	0.273472	0.0401335	40.1423	6.54066	2105.86	976.79	0.0271342	767.583	2.02361	1160.97	0.0516012	0.0148453	0.577097	0.802618	0.871809	699.099	0.0110927	663.616	2.02428	64	19.9535	15.981	2.49194	16.2948	0.267002	2.34119	0.689275	265.52	0.00526923	0.34721	5222.7	0.385419
material21	BACKPROJTOF	1068.75	2.0671e+06	-4412.43	1056.35	78.1006	0.862312	4.20862	6.50673	0.00118396	10.552	0.27168	0.189532	-0.187338	0.941868	0.98108	0.911351	0.183161	0.0134643	57.4172	6.81046	3617.39	1056.35	0.0190841	1190.73	1.36646	1553.64	0.0200452	0.0107301	0.769448	0.9069	0.936637	1119.4	0.00942066	1120.63	2.16677	64	28.3285	29.5007	2.38428	17.8373	0.233265	1.70105	-0.00745652	318.171	0.00283263	0.275043	5340.67	0.577375
material31	BACKPROJTOF	1149.68	1.54671e+06	-11298.6	771.116	84.1299	0.80328	4.26604	6.84104	0.00111189	10.4985	0.252864	0.168119	-0.152406	0.907395	0.979726	0.907108	0.166129	0.0119088	62.5439	6.64047	3896.31	771.116	0.0203559	1306.92	1.29421	1590.19	0.0152166	0.00845831	0.800114	0.921679	0.945672	1246.08	0.00745801	1222.29	1.9971	64	31.1056	33.8228	2.3689	15.9616	0.280295	2.16599	-0.404922	254.771	0.00228919	0.250904	5917.35	0.500512
material41	BACKPROJTOF	1216.78	1.82576e+06	-7509.9	937.166	97.8761	0.810883	4.38755	7.56517	0.000848451	10.7474	0.231381	0.147179	-0.156036	0.915381	0.976463	0.898181	0.147337	0.00935279	63.4651	6.80384	4147.67	937.166	0.0174991	1379.38	1.26182	1667.9	0.0137215	0.00774439	0.813913	0.928501	0.94955	1314.28	0.00683289	1301.25	2.15042	64	31.6989	33.1152	2.3689	17.2183	0.242242	1.87959	-0.191601	296.471	0.00267261	0.241268	5917.23	0.610526
material51	BACKPROJTOF	1085.2	1.68531e+06	-3309.63	930.96	87.3355	0.82847	4.28963	6.9669	0.000913958	10.6654	0.249554	0.164995	-0.166689	0.925377	0.979024	0.905667	0.165707	0.00825503	59.1368	6.79385	3670.74	930.96	0.0173427	1248	1.31187	1538.57	0.0151449	0.00789777	0.793529	0.91861	0.943756	1185	0.0069435	1169.4	2.11064	64	29.7494	29.9468	2.3689	16.8644	0.245974	1.82854	-0.0575083	284.408	0.00280007	0.25734	5591.2	0.549135
material61	BACKPROJTOF	988.952	1.33918e+06	-685.755	772.568	78.3234	0.815906	4.20663	6.50223	0.00116643	10.4635	0.26937	0.186677	-0.174592	0.93009	0.981076	0.911428	0.184696	0.0084935	57.1101	6.70724	3313.02	772.568	0.0186037	1155.29	1.36975	1432.57	0.0143697	0.00770901	0.770728	0.907071	0.937167	1098.24	0.00681874	1065.56	2.06376	64	28.687	28.2395	2.39966	15.5773	0.254891	2.08117	-0.00509691	242.652	0.00295809	0.269082	5386.86	0.448319
material71	BACKPROJTOF	1137.41	1.4545e+06	-6353.08	780.179	80.3722	0.813208	4.24239	6.7126	0.00100819	10.5015	0.259918	0.176509	-0.170323	0.926548	0.980509	0.908536	0.17114	0.00792747	62.047	6.70929	3842.45	780.179	0.0191271	1288.35	1.30016	1613.38	0.0120041	0.00770336	0.79031	0.919084	0.942255	1217.45	0.00703887	1214.53	2.08163	64	31.0091	32.5923	2.39966	15.9063	0.257016	2.13991	-0.24269	253.009	0.00250784	0.260544	5528.03	0.486772
material81	BACKPROJTOF	1220.63	1.8183e+06	-13653.8	863.949	71.5197	0.847094	4.17715	6.51498	0.00104809	10.4154	0.25277	0.167138	-0.176904	0.931445	0.982421	0.910169	0.165695	0.00953202	63.9539	6.68376	4143.82	863.949	0.0201198	1343.31	1.26225	1703.08	0.0137957	0.00925409	0.80973	0.927448	0.948097	1267.87	0.0085364	1283.53	2.06422	64	31.6945	35.1301	2.38428	16.7047	0.265246	2.05854	-0.40566	279.045	0.00208141	0.274161	5421.16	0.511734
material91	BACKPROJTOF	1042.93	1.66707e+06	-11467.3	924.844	54.1615	0.889354	3.98208	5.6973	0.00135988	10.1459	0.265979	0.177277	-0.207117	0.95084	0.986518	0.919927	0.184141	0.00920461	57.4547	6.62584	3508.42	924.844	0.0224747	1159.62	1.3005	1452.17	0.0173162	0.00969267	0.791404	0.918993	0.942716	1095.76	0.00855629	1092.03	2.0282	64	28.5053	32.5615	2.46118	16.7198	0.259481	1.72428	-0.249183	279.553	0.00194386	0.308407	5014.9	0.456888
material101	BACKPROJTOF	742.726	1.74579e+06	6482.44	1040.01	49.43	0.909256	3.91059	5.25262	0.00301829	9.7473	0.296271	0.210523	-0.246266	0.9671	0.987716	0.926043	0.202807	0.024885	44.5009	6.52533	2482.15	1040.01	0.0313734	843.552	1.41132	1034.39	0.0291106	0.0144558	0.74064	0.894892	0.927026	799.892	0.0121536	764.513	2.0251	64	21.8602	17.9805	2.66113	16.9342	0.257254	1.6943	0.381237	286.768	0.00289273	0.344181	4764.4	0.434273
material11	BACKPROJ	663.443	2.03425e+06	15046.9	946.6	55.3217	0.889571	3.80147	4.82093	0.00323509	9.84252	0.372893	0.303836	-0.251122	0.96999	0.986661	0.933743	0.270992	0.0241466	41.9821	6.61801	2197.22	946.6	0.0281506	767.296	1.80366	1145.6	0.0380181	0.0143176	0.610927	0.827986	0.882459	696.933	0.0114038	683.981	2.03829	64	20.5481	17.3345	2.52271	16.1804	0.262422	2.33219	0.651326	261.804	0.00508256	0.336337	5304.02	0.391693
material21	BACKPROJ	1082.26	1.98402e+06	-4120.89	1019.77	80.5599	0.853573	4.23355	6.66499	0.000960996	10.6424	0.261794	0.17819	-0.17974	0.936899	0.980491	0.909299	0.176342	0.00963751	58.2222	6.82818	3661.12	1019.77	0.0192316	1188.52	1.29428	1524.85	0.0161115	0.0102239	0.788098	0.91879	0.941319	1119.11	0.00914673	1128.41	2.16888	64	28.5591	29.7853	2.41504	17.687	0.233279	1.73435	-0.00842756	312.832	0.00293115	0.270736	5346.71	0.576196
material31	BACKPROJ	1116.82	1.3608e+06	-9478.33	717.732	83.7792	0.790975	4.26365	6.84382	0.00101028	10.5188	0.250671	0.164982	-0.145761	0.899433	0.97979	0.90701	0.16259	0.00882875	61.9139	6.62458	3774.64	717.732	0.0206892	1263.18	1.26125	1533.39	0.0126911	0.00788871	0.810071	0.927615	0.948206	1205.14	0.00707237	1186.76	1.98235	64	30.7463	33.1921	2.38428	15.5391	0.283492	2.19541	-0.384757	241.464	0.00230722	0.250227	5914.45	0.475202
material41	BACKPROJ	1186.28	1.61772e+06	-6275.5	883.171	97.3562	0.801433	4.38604	7.578	0.000768387	10.7611	0.228963	0.143965	-0.150025	0.908587	0.976553	0.897904	0.142212	0.00592008	62.9232	6.78458	4034.71	883.171	0.0177622	1329.15	1.22232	1623.21	0.0110625	0.00749959	0.83007	0.936567	0.953991	1267.93	0.00679902	1265.43	2.11533	64	31.3333	32.7615	2.3689	16.8433	0.248872	1.88106	-0.178928	283.696	0.00266609	0.241716	5922.55	0.582328
material51	BACKPROJ	1048.07	1.62022e+06	-2767.18	914.696	86.456	0.827287	4.28592	6.95572	0.000912929	10.6608	0.248379	0.163271	-0.164595	0.923172	0.979198	0.905706	0.162806	0.00793227	58.0005	6.78196	3538.03	914.696	0.0181811	1190.37	1.27517	1460.6	0.0144923	0.00860803	0.80833	0.925929	0.947958	1131.8	0.00771321	1121.38	2.09706	64	28.9701	29.2008	2.38428	16.7976	0.246661	1.8087	-0.0289374	282.158	0.00282936	0.258162	5666.49	0.54364
material61	BACKPROJ	952.457	1.28086e+06	-173.228	759.665	77.2838	0.815321	4.20025	6.47021	0.00114118	10.4604	0.269803	0.186838	-0.17189	0.927483	0.981299	0.91176	0.183322	0.00781561	55.9236	6.69262	3183.35	759.665	0.0195052	1096.8	1.31892	1348.66	0.0139011	0.00853889	0.77644	0.913524	0.937775	1042.4	0.00764484	1016.89	2.05872	64	27.8475	27.2705	2.41504	15.5383	0.25445	2.04822	0.0268143	241.439	0.00304872	0.269283	5484.79	0.446835
material71	BACKPROJ	1116.34	1.48424e+06	-6109.35	792.861	80.7521	0.815131	4.2425	6.72884	0.00102177	10.5121	0.258083	0.17459	-0.169077	0.925506	0.98042	0.908347	0.174239	0.00868503	61.2638	6.71187	3768.78	792.861	0.0199993	1252.41	1.31455	1577.03	0.0135599	0.00842396	0.780203	0.91505	0.939012	1182.42	0.00752444	1176.17	2.0943	64	30.2359	31.7848	2.4458	16.1865	0.252266	2.06533	-0.200727	262.003	0.00260324	0.260347	5577.8	0.502438
material81	BACKPROJ	1206.55	1.86299e+06	-13486.9	879.838	72.2794	0.848172	4.18434	6.54095	0.00110955	10.4247	0.253372	0.168168	-0.176584	0.931292	0.982244	0.909897	0.166485	0.0115633	63.3927	6.68822	4095.24	879.838	0.0215829	1312.64	1.26262	1627.72	0.0158563	0.0101669	0.801861	0.925563	0.945311	1242.71	0.00912477	1243.73	2.08168	64	30.8514	34.3149	2.41504	17.0871	0.258972	1.95828	-0.344674	291.971	0.00217175	0.273432	5506.6	0.534906
material91	BACKPROJ	1062.3	1.65159e+06	-11702.4	910.373	55.4997	0.885079	4.00384	5.78584	0.00126199	10.1808	0.264062	0.174819	-0.203066	0.94861	0.98619	0.91878	0.173558	0.00783699	58.2609	6.63596	3575.51	910.373	0.0237564	1155.04	1.27319	1449.78	0.0157644	0.00999658	0.797734	0.923207	0.944171	1091.36	0.00897415	1093.49	2.03468	64	28.4599	32.5615	2.49194	16.8403	0.258375	1.71219	-0.238222	283.596	0.00196524	0.305888	5098.85	0.466661
material101	BACKPROJ	752.881	1.74627e+06	5870.78	1041.73	50.1587	0.908125	3.9197	5.29278	0.0030023	9.75951	0.296131	0.211351	-0.246611	0.96736	0.987539	0.925547	0.205565	0.0260299	44.9439	6.53611	2516.89	1041.73	0.036698	824.605	1.40659	999.225	0.0309851	0.0158372	0.752201	0.898396	0.931346	785.137	0.0136075	747.249	2.01309	64	21.3875	16.7961	2.69189	17.0277	0.262682	1.71076	0.419811	289.942	0.00300601	0.339915	4998.94	0.444591
material11	ITERATIVETOF	723.387	2.3293e+06	17519.7	1040.75	67.2386	0.87863	3.88354	5.18405	0.00229907	9.98441	0.367483	0.298901	-0.244804	0.968653	0.984147	0.929973	0.269017	0.0152292	43.8182	6.68154	2419.88	1040.75	0.021143	871.125	1.90797	1332.19	0.0338394	0.0127138	0.628986	0.827458	0.893111	793.21	0.0108597	780.676	2.10642	64	22.1986	17.9036	2.43042	16.9693	0.248527	2.17933	0.601565	287.958	0.00573891	0.303307	5424.16	0.477668
material21	ITERATIVETOF	1088.02	2.02423e+06	-3619.42	1041.28	94.2054	0.834071	4.31923	6.99908	0.000882303	10.7222	0.266448	0.185433	-0.171348	0.930567	0.977681	0.906232	0.178211	0.0076198	58.3525	6.83439	3695.4	1041.28	0.0171033	1245.56	1.35633	1603.76	0.015447	0.008811	0.785929	0.912034	0.942311	1175.94	0.00807166	1173.19	2.1887	64	29.3451	30.5851	2.38428	17.6665	0.230442	1.74661	-0.0150567	312.105	0.00328532	0.242933	5778.51	0.642032
material31	ITERATIVETOF	1149.14	1.38609e+06	-8141.75	726.107	103.117	0.7513	4.39209	7.45179	0.00092636	10.6448	0.242591	0.15817	-0.139669	0.893341	0.975784	0.900556	0.151274	0.0102681	63.0363	6.66416	3903.92	726.107	0.0193058	1328.54	1.32675	1612.73	0.015612	0.00709188	0.818352	0.926543	0.952162	1270.39	0.00651459	1246.22	1.99839	64	31.6805	33.2229	2.32275	15.5755	0.284436	2.27579	-0.340468	242.596	0.0027615	0.22318	6431.45	0.538058
material41	ITERATIVETOF	1209.42	1.74847e+06	-5521.16	929.135	119.292	0.772444	4.51234	8.14755	0.000785363	10.8242	0.228506	0.146159	-0.14632	0.905105	0.97215	0.892396	0.140377	0.00797862	63.4651	6.80758	4139.21	929.135	0.016918	1403.71	1.33626	1688.91	0.0167684	0.00705634	0.815842	0.925668	0.951453	1341.87	0.00632686	1316.52	2.17052	64	31.9522	32.3846	2.33813	17.1935	0.23787	1.87242	-0.137304	295.617	0.00311828	0.214304	6662.4	0.685304
material51	ITERATIVETOF	1084.41	1.75388e+06	-892.342	949.985	107.224	0.797157	4.40194	7.47162	0.000914148	10.7424	0.249739	0.167182	-0.164292	0.924028	0.975054	0.900844	0.161465	0.0103049	59.1175	6.82659	3684.33	949.985	0.0169949	1276.74	1.37373	1529.45	0.018241	0.00753996	0.796298	0.917329	0.945603	1221.5	0.00663075	1182.75	2.15306	64	29.8392	29.2623	2.35352	17.1002	0.239554	1.8507	0.0252149	292.417	0.00361566	0.228847	6120.17	0.638161
material61	ITERATIVETOF	1002.22	1.36956e+06	1580.82	788.251	99.5866	0.775665	4.34869	7.12844	0.00120441	10.5326	0.266531	0.18629	-0.168583	0.925309	0.976668	0.905005	0.176896	0.0081656	57.6215	6.71839	3379.38	788.251	0.0180505	1183.11	1.39086	1469.83	0.0136065	0.00767679	0.775672	0.906853	0.939525	1124.05	0.00698616	1092.7	2.09776	64	29.0113	27.9011	2.3689	15.8456	0.250849	2.08878	0.0842637	251.084	0.00378931	0.236687	6009.97	0.529907
material71	ITERATIVETOF	1093.11	1.24403e+06	-3932.26	725.317	94.8325	0.768744	4.34175	7.16695	0.00102538	10.5396	0.254169	0.172238	-0.158459	0.914884	0.977464	0.903742	0.168687	0.00823064	61.1714	6.68196	3694.42	725.317	0.0184301	1267.04	1.31979	1588.08	0.0104108	0.00702688	0.793522	0.917793	0.944002	1201.44	0.00659027	1188.87	2.07123	64	30.8642	31.5771	2.35352	15.3722	0.259174	2.17859	-0.179619	236.306	0.00294013	0.235148	6082.38	0.506234
material81	ITERATIVETOF	1175.4	1.57229e+06	-11170.8	793.327	82.2502	0.812124	4.26885	6.93246	0.00092294	10.4868	0.241427	0.155296	-0.161519	0.917416	0.980039	0.905417	0.156735	0.00489507	63.1704	6.66322	3986.39	793.327	0.0200195	1324.39	1.23794	1606.69	0.0126744	0.00806537	0.835596	0.937056	0.956212	1262.27	0.00761546	1259.65	2.03741	64	31.6822	34.3918	2.32275	15.9981	0.272045	2.173	-0.402318	255.939	0.00234195	0.248362	5948.37	0.518971
material91	ITERATIVETOF	949.135	1.5228e+06	-9062.91	890.212	59.0845	0.87552	4.04295	5.87418	0.00146557	10.1396	0.267395	0.179289	-0.199604	0.94574	0.985393	0.918003	0.175828	0.0109068	54.4556	6.5882	3181.5	890.212	0.0227802	1074.28	1.31827	1323.43	0.0196883	0.0110147	0.799948	0.921137	0.945954	1017.48	0.0101303	1007.16	2.00677	64	27.2281	30.7004	2.38428	16.3053	0.264184	1.73753	-0.189187	265.862	0.00224547	0.285677	5404.55	0.46977
material101	ITERATIVETOF	701.723	1.63442e+06	6899.17	988.589	59.9263	0.885693	4.02634	5.66552	0.00286995	9.7811	0.290558	0.205468	-0.236032	0.962827	0.985321	0.921372	0.193254	0.0190985	43.3386	6.5058	2345.24	988.589	0.0305844	821.203	1.47891	1003.33	0.031676	0.0141696	0.767619	0.898837	0.938585	782.686	0.0126105	743.872	2.03649	64	21.6726	17.9266	2.61499	16.5619	0.256362	1.7672	0.39364	274.298	0.00362483	0.30649	4857.68	0.482275
material11	ITERATIVE	691.111	2.16536e+06	17147.1	999.709	60.8126	0.885316	3.81874	4.91633	0.00248781	9.90071	0.378655	0.310652	-0.249378	0.969767	0.98556	0.933108	0.270801	0.0200451	42.7264	6.64626	2301.49	999.709	0.0202692	837.886	1.88843	1272.38	0.0332934	0.0126182	0.633031	0.828958	0.894708	763.79	0.0109103	750.121	2.08955	64	21.8031	17.4498	2.41504	16.5771	0.251909	2.20036	0.615624	274.8	0.00515686	0.320069	5201.38	0.432234
material21	ITERATIVE	1081.66	1.99107e+06	-3136.38	1026.35	87.3948	0.843063	4.27023	6.76321	0.000865654	10.6989	0.265716	0.182622	-0.175987	0.934425	0.979195	0.908779	0.178209	0.00669486	58.2037	6.83607	3664.98	1026.35	0.0168206	1240.9	1.34612	1583.53	0.0149228	0.00871362	0.791169	0.914842	0.943849	1173.8	0.00803501	1168.58	2.17876	64	29.3838	30.6543	2.38428	17.4706	0.232654	1.77381	-0.01674	305.221	0.00314313	0.255698	5466.76	0.597124
material31	ITERATIVE	1127.18	1.3054e+06	-7891.25	699.442	94.8876	0.761097	4.32751	7.10181	0.000944814	10.572	0.250352	0.165288	-0.144175	0.898204	0.977614	0.904661	0.160024	0.00765306	62.4833	6.64197	3817.69	699.442	0.0194366	1305.06	1.32373	1598.58	0.0138459	0.00703086	0.804841	0.921076	0.948002	1243.15	0.00639589	1221.13	1.96423	64	31.4393	33.1152	2.32275	15.2558	0.292744	2.31567	-0.359233	232.739	0.00254874	0.235073	6142.69	0.489748
material41	ITERATIVE	1192.79	1.66979e+06	-4959.01	899.173	110.841	0.780525	4.45921	7.8501	0.000803059	10.7633	0.232643	0.149645	-0.153695	0.913019	0.973968	0.895673	0.14643	0.00788125	63.1095	6.79848	4070.1	899.173	0.0169811	1383.12	1.29466	1666.98	0.0135905	0.00681626	0.816283	0.926252	0.951281	1324.21	0.00608583	1296.6	2.15005	64	31.804	32.3462	2.32275	16.8862	0.242288	1.91415	-0.137424	285.144	0.0030247	0.224477	6343.49	0.631161
material51	ITERATIVE	1063.47	1.67738e+06	-755.466	926.637	99.73	0.805665	4.34714	7.17208	0.00095705	10.6726	0.25634	0.172852	-0.171308	0.929843	0.976695	0.904294	0.16417	0.0108472	58.5404	6.8116	3602.5	926.637	0.0170155	1254.13	1.36444	1509.81	0.0168822	0.00732869	0.79098	0.914317	0.944118	1196.86	0.00644647	1160.39	2.12971	64	29.62	29.0701	2.33813	16.825	0.244046	1.86659	0.0227635	283.08	0.00336629	0.241073	5855.23	0.586199
material61	ITERATIVE	969.583	1.32054e+06	1367.54	769.434	90.5165	0.789486	4.27529	6.74513	0.00131412	10.4383	0.27592	0.194789	-0.177988	0.932738	0.978686	0.909489	0.18162	0.0101298	56.5634	6.70087	3255.7	769.434	0.0182433	1148.49	1.41872	1441.52	0.0149507	0.00795433	0.759992	0.900879	0.934351	1087.79	0.00723274	1057.06	2.0708	64	28.5468	27.4243	2.35352	15.5621	0.255221	2.10638	0.0741354	242.179	0.00343635	0.251783	5726.37	0.480725
material71	ITERATIVE	1120.81	1.27797e+06	-4594.5	734.133	91.9826	0.777313	4.31376	7.00171	0.00103965	10.5168	0.258187	0.175273	-0.164704	0.921203	0.978173	0.905809	0.169313	0.00734102	61.9767	6.68848	3790.92	734.133	0.0184384	1299.17	1.32372	1625.83	0.0098047	0.00663004	0.792851	0.917182	0.943898	1230.37	0.00627344	1219.88	2.06344	64	31.3516	32.4385	2.3689	15.3946	0.261589	2.19461	-0.213461	236.993	0.00272902	0.243299	5872.2	0.49107
material81	ITERATIVE	1247.56	1.75691e+06	-12663.1	834.877	83.2688	0.818615	4.27601	6.93086	0.000907448	10.5215	0.243634	0.157495	-0.16399	0.920541	0.979853	0.90559	0.155777	0.00480042	65.1048	6.69008	4247.16	834.877	0.0194696	1406.89	1.25459	1710.68	0.012232	0.00768055	0.831798	0.934317	0.955403	1340.97	0.00724895	1336.58	2.05427	64	32.6999	35.6223	2.35352	16.351	0.270908	2.19951	-0.432649	267.355	0.00227778	0.251442	5808.17	0.535674
material91	ITERATIVE	981.055	1.55193e+06	-10240.1	893.515	59.1721	0.875779	4.04007	5.86686	0.00140657	10.1447	0.265728	0.177262	-0.199062	0.945421	0.985387	0.918122	0.179085	0.00954568	55.5867	6.58942	3294.24	893.515	0.0226899	1108.21	1.32914	1383.63	0.0188389	0.0104313	0.806145	0.921138	0.948588	1047.61	0.00971648	1043.39	2.00819	64	27.8632	31.5771	2.38428	16.3432	0.263807	1.75133	-0.236453	267.102	0.00212733	0.289436	5335.15	0.465386
material101	ITERATIVE	716.408	1.58695e+06	5758.22	983.461	59.2021	0.886441	4.01955	5.67688	0.00253658	9.80576	0.284037	0.198101	-0.233672	0.961943	0.985471	0.921072	0.195794	0.0155767	44.061	6.51656	2393.05	983.461	0.0292904	842.084	1.41667	993.672	0.0280594	0.0135712	0.783998	0.906516	0.94324	807.808	0.0121085	761.165	2.03295	64	22.078	18.7649	2.59961	16.5487	0.254637	1.72049	0.351562	273.859	0.00340217	0.310002	4760.96	0.475769
material11	TRUEX	679.227	2.3579e+06	19935.8	1042.18	65.653	0.881475	3.84121	5.01675	0.0029409	9.84969	0.380197	0.312982	-0.249005	0.969163	0.984651	0.932256	0.271101	0.0186236	41.7179	6.61202	2274.6	1042.18	0.0205654	840.6	1.92044	1189.63	0.0388276	0.0148152	0.633758	0.827554	0.895725	776.338	0.0127671	734.935	2.08295	64	21.1744	16.0579	2.27661	16.9304	0.255121	2.25843	0.686682	286.638	0.00574296	0.317875	5254.05	0.454427
material21	TRUEX	1023.34	1.82973e+06	-1336.49	976.131	89.4471	0.832117	4.27691	6.77847	0.00086684	10.7038	0.267754	0.185062	-0.172142	0.931051	0.978853	0.908821	0.179597	0.00607479	56.6275	6.82097	3456.82	976.131	0.0166068	1178.62	1.34324	1502.57	0.0153873	0.00922657	0.784836	0.912843	0.941592	1113.1	0.00848215	1107.37	2.16466	64	28.5454	29.3931	2.27661	17.1051	0.23473	1.82034	0.0386678	292.583	0.0033523	0.260474	5382.8	0.561943
material31	TRUEX	963.646	972060	-4417.97	609.666	91.5959	0.738779	4.28965	6.88671	0.0010565	10.4621	0.25685	0.171499	-0.142877	0.894608	0.97846	0.90742	0.168068	0.00971875	57.7626	6.56857	3230.49	609.666	0.0200534	1130.61	1.31775	1374.73	0.0155712	0.00794991	0.802093	0.920554	0.946934	1081.3	0.00709268	1049.43	1.92352	64	29.0529	29.916	2.15356	14.3312	0.29774	2.31803	-0.235021	205.384	0.00262139	0.243823	6079.29	0.417364
material41	TRUEX	1112.46	1.46768e+06	-2457.24	849.902	115.023	0.761597	4.4777	7.92803	0.000816062	10.7574	0.232893	0.149902	-0.149844	0.908391	0.973248	0.895039	0.143663	0.00752288	60.9504	6.77084	3785.33	849.902	0.016976	1303.5	1.28888	1539.11	0.0141394	0.00696239	0.82335	0.928708	0.953551	1255.75	0.00619481	1214.11	2.11821	64	30.6936	30.6005	2.21509	16.4942	0.247578	1.9169	-0.0535499	272.057	0.00328312	0.224838	6329.65	0.601304
material51	TRUEX	1008.65	1.64912e+06	1932.34	913.688	105.594	0.792808	4.37316	7.29113	0.00101204	10.6778	0.255632	0.172408	-0.172655	0.931192	0.97563	0.903283	0.165314	0.0123684	56.8023	6.81226	3412.7	913.688	0.0168895	1198.79	1.35459	1417.83	0.018195	0.00843457	0.799609	0.917784	0.9468	1151.39	0.0075408	1104.71	2.13257	64	28.7056	27.6473	2.23047	16.7554	0.244742	1.9243	0.127384	280.743	0.00398065	0.240896	5783.9	0.582091
material61	TRUEX	939.856	1.29477e+06	3717.42	760.196	98.567	0.770445	4.31357	6.9468	0.00134983	10.4538	0.272832	0.192022	-0.175588	0.930786	0.977134	0.907546	0.182363	0.00859078	55.6579	6.69827	3157.24	760.196	0.0180189	1127.19	1.41986	1378.15	0.0151062	0.00822904	0.767949	0.902424	0.937437	1076.73	0.00743855	1028.1	2.07346	64	28.0483	26.2708	2.26123	15.5381	0.257794	2.16111	0.183134	241.434	0.0039955	0.248571	5748.4	0.486652
material71	TRUEX	977.971	996991	-2297.33	655.014	89.4499	0.759693	4.27406	6.79399	0.00117226	10.3974	0.266199	0.183556	-0.165488	0.92024	0.978883	0.908559	0.177902	0.0104257	57.8474	6.61948	3279.31	655.014	0.0188577	1150.06	1.35187	1447.41	0.0109152	0.007285	0.784658	0.912496	0.941754	1090.39	0.0068886	1070.62	1.99304	64	29.2891	29.6853	2.21509	14.5877	0.271837	2.18377	-0.119624	212.802	0.00292754	0.25044	5636.59	0.44258
material81	TRUEX	1222.79	1.6766e+06	-11132.4	816.108	88.8975	0.803543	4.30782	7.04978	0.00090348	10.5387	0.243075	0.156866	-0.163063	0.91984	0.978732	0.904594	0.156753	0.00518381	64.5285	6.69499	4160.83	816.108	0.0189706	1378.07	1.25299	1697.09	0.011984	0.00803971	0.823797	0.932042	0.952705	1308.8	0.00759736	1311.4	2.06397	64	32.3645	34.7148	2.27661	16.2479	0.268422	2.2023	-0.388467	263.995	0.0023819	0.25161	5789.9	0.528239
material91	TRUEX	915.801	1.35111e+06	-8766.59	820.615	59.2999	0.865214	4.03769	5.80707	0.00145632	10.0901	0.270824	0.182282	-0.195696	0.942309	0.985413	0.91905	0.177883	0.00890688	53.8692	6.55178	3059.55	820.615	0.0221392	1036.84	1.33513	1295.13	0.0206879	0.0118172	0.808647	0.921103	0.949645	983.676	0.0110597	972.79	1.96245	64	26.9092	30.3159	2.26123	15.772	0.276308	1.79943	-0.220852	248.754	0.00216443	0.29982	5056.46	0.432226
material101	TRUEX	634.046	1.29076e+06	5292.53	868.596	56.6842	0.877477	3.98092	5.49675	0.00275629	9.69836	0.292789	0.207282	-0.232922	0.960439	0.986095	0.923441	0.202017	0.0175818	41.5243	6.44312	2099.29	868.596	0.0288257	739.754	1.41068	879.172	0.0318047	0.0167287	0.785787	0.908621	0.943611	708.179	0.0152321	670.137	1.96596	64	20.6202	17.3345	2.39966	15.6545	0.270297	1.81059	0.387812	245.063	0.00324441	0.32698	4756.91	0.402965
material11	TRUEXTOF	704.143	2.33617e+06	18665.7	1049.96	73.1518	0.869734	3.92456	5.33969	0.00258136	9.95448	0.367892	0.29958	-0.238978	0.965878	0.982997	0.928435	0.261812	0.0176676	42.8925	6.63872	2364.3	1049.96	0.0211652	848.949	1.85241	1253.94	0.0341967	0.0145165	0.638156	0.832564	0.896189	775.693	0.0126313	759.093	2.09689	64	21.6191	16.7654	2.32275	17.0813	0.251443	2.20317	0.651133	291.769	0.00584807	0.298256	5554.97	0.492671
material21	TRUEXTOF	1008.6	1.78249e+06	-1628.67	969.13	96.3107	0.819211	4.32941	7.03816	0.000899699	10.7213	0.265612	0.184434	-0.165587	0.925035	0.97731	0.905917	0.178116	0.00792142	56.2279	6.80597	3411.66	969.13	0.0169138	1161.58	1.33825	1480.1	0.0151843	0.0093464	0.78906	0.914076	0.943001	1097.9	0.0085294	1091.45	2.15669	64	28.2608	28.9701	2.29199	17.1121	0.235519	1.79582	0.0437178	292.823	0.00347948	0.246025	5742.37	0.595425
material31	TRUEXTOF	1002.75	1.0348e+06	-4006.9	633.556	103.167	0.719934	4.38451	7.38877	0.000945766	10.603	0.244554	0.159662	-0.132141	0.881539	0.975882	0.901494	0.154438	0.00942379	58.9966	6.60604	3378.33	633.556	0.0194087	1173.3	1.2765	1404.03	0.0140476	0.00761557	0.819519	0.929187	0.951838	1124.61	0.00693751	1095.32	1.97163	64	29.6605	30.2698	2.21509	14.6838	0.288032	2.2973	-0.196306	215.613	0.00318741	0.227309	5824.71	0.500831
material41	TRUEXTOF	1076.06	1.39911e+06	-2408.17	838.883	119.963	0.749783	4.50912	8.11139	0.000813443	10.7803	0.231029	0.149083	-0.142523	0.899473	0.972148	0.892998	0.143517	0.008389	59.8777	6.75042	3661.39	838.883	0.016995	1262.65	1.29027	1518.97	0.0150621	0.00744086	0.815646	0.926631	0.950888	1210.59	0.00664432	1179.62	2.09725	64	30.1688	29.8391	2.23047	16.4167	0.251118	1.87739	-0.0396563	269.507	0.00337147	0.216458	6629.85	0.620297
material51	TRUEXTOF	991.951	1.54778e+06	1912.69	887.573	110.461	0.778644	4.41343	7.51955	0.000910167	10.7362	0.249147	0.1661	-0.159608	0.919085	0.974511	0.900539	0.160469	0.00990412	56.4862	6.79575	3356.71	887.573	0.0169429	1175.73	1.30478	1374.74	0.0160565	0.00821128	0.811771	0.924487	0.949915	1132.73	0.00732605	1087.12	2.12353	64	28.4823	27.2705	2.26123	16.6107	0.246999	1.91344	0.133	275.917	0.00415148	0.23051	6073.93	0.59905
material61	TRUEXTOF	897.96	1.15672e+06	4041.71	721.921	101.481	0.753509	4.35075	7.13199	0.00134654	10.4662	0.267894	0.187613	-0.164103	0.919806	0.976391	0.905189	0.177864	0.0108533	54.5106	6.65855	3011.74	721.921	0.0182422	1081.78	1.43392	1346.7	0.0143818	0.00784456	0.7615	0.90022	0.935257	1030.42	0.00708151	987.53	2.03767	64	27.5017	25.6248	2.27661	15.206	0.265079	2.15952	0.215147	231.224	0.00410119	0.239031	6061.55	0.4853
material71	TRUEXTOF	1023.63	1.11565e+06	-1451.33	693.604	100.372	0.747167	4.36913	7.28506	0.00109189	10.5352	0.256584	0.175684	-0.155945	0.911996	0.976397	0.902733	0.169111	0.00968169	59.1717	6.66505	3450.55	693.604	0.0183084	1204.22	1.33675	1498.87	0.00966668	0.00690086	0.792602	0.916086	0.944146	1145.17	0.00651421	1123.08	2.05477	64	29.9483	29.8007	2.27661	15.0405	0.262355	2.18655	-0.0642498	226.216	0.00325078	0.234058	6090.17	0.487356
material81	TRUEXTOF	1172.77	1.53748e+06	-9549.36	785.306	90.783	0.792755	4.32968	7.18965	0.00088174	10.5635	0.239242	0.154014	-0.155412	0.911837	0.978238	0.902763	0.155536	0.00461147	63.2182	6.68347	3981.48	785.306	0.0192483	1326.89	1.21593	1590.57	0.0114501	0.00806745	0.842857	0.940349	0.958109	1269.37	0.0076217	1261.07	2.05201	64	31.7034	33.792	2.29199	16.0006	0.269905	2.18652	-0.345557	256.02	0.00253202	0.245104	5942.41	0.527364
material91	TRUEXTOF	932.651	1.43079e+06	-8378.35	843.662	62.9578	0.861115	4.08303	6.01121	0.00137448	10.1801	0.265058	0.177175	-0.192824	0.94134	0.984537	0.9165	0.173889	0.00973451	54.313	6.58909	3121.23	843.662	0.0219352	1059.79	1.30786	1292.09	0.0193102	0.011219	0.810798	0.924531	0.949578	1008.71	0.0104126	992.204	1.99091	64	27.1348	30.2928	2.32275	15.9994	0.270784	1.80547	-0.189291	255.98	0.00225344	0.288478	5348.36	0.44829
material101	TRUEXTOF	620.646	1.2704e+06	5517.39	850.446	58.0955	0.872113	3.99459	5.55015	0.00274883	9.71327	0.292467	0.207469	-0.230804	0.959528	0.985778	0.922844	0.203015	0.0174434	41.1124	6.44279	2052.43	850.446	0.029807	731.602	1.45744	875.002	0.0328988	0.0157687	0.776499	0.902379	0.941402	700.911	0.014186	658.173	1.95531	64	20.4449	17.2191	2.43042	15.5015	0.273759	1.86062	0.407182	240.297	0.003244	0.321468	5038.8	0.38959
[truncated: 1 more columns]

## Sheet: Recon_FixBinSize
ROI	Recon	-333-1AutoCorrelation	-333-1ClusterProminence	-333-1ClusterShade	-333-1ClusterTendendcy	-333-1Contrast	-333-1Correlation	-333-1DifferenceEntropy	-333-1Dissimilarity	-333-1Energy	-333-1Entropy	-333-1Homogeneity	-333-1Homogeneity2	-333-1InformationMeasureCorr1	-333-1InformationMeasureCorr2	-333-1InverseDiffMomentNorm	-333-1InverseDiffNorm	-333-1InverseVariance	-333-1MaxProbability	-333-1SumAverage	-333-1SumEntropy	-333-1SumVariance	-333-1Variance	-333GrayLevelNonuniformity	-333HighGrayLevelRunEmpha	-333LongRunEmphasis	-333LongRunHighGrayLevelEmpha	-333LongRunLowGrayLevelEmpha	-333LowGrayLevelRunEmpha	-333RunLengthNonuniformity	-333RunPercentage	-333ShortRunEmphasis	-333ShortRunHighGrayLevelEmpha	-333ShortRunLowGrayLevelEmpha	EnergyNorm	GlobalEntropy	GlobalMax	GlobalMean	GlobalMedian	GlobalMin	GlobalStd	GlobalUniformity	Kurtosis	Skewness	Variance	Busyness	Coarseness	Complexity	Contrast
material11	BACKPROJTOF	193.749	189543	2780.38	289.93	15.4473	0.898832	2.99715	2.49328	0.0159085	8.01972	0.507876	0.449586	-0.28748	0.965587	0.987569	0.937402	0.300662	0.10796	22.3721	5.63535	570.049	289.93	0.0537891	65.6334	5.40865	267.836	0.635091	0.0787875	0.276816	0.571736	0.723567	49.3412	0.0475695	45.5604	0.862241	17	5.11529	4.00098	0.498047	4.40426	0.592407	2.33966	0.687661	19.3975	0.0135618	1.91076	70.7728	0.0649854
material21	BACKPROJTOF	368.839	237049	-869.809	357.587	26.4979	0.862021	3.48573	3.77272	0.00342773	9.06579	0.365931	0.283898	-0.203561	0.933749	0.98097	0.911592	0.248535	0.0361589	33.827	6.02134	1130.74	357.587	0.0489352	109.895	2.57721	280.005	0.186499	0.049849	0.465866	0.738147	0.822298	90.0729	0.0364777	88.3089	0.999978	18	7.86771	7.99805	0.500977	5.13927	0.500015	1.70286	-0.00784704	26.4121	0.00766256	1.30292	94.4809	0.118187
material31	BACKPROJTOF	413.774	192656	-2352.9	272.228	29.7972	0.802701	3.56344	4.05677	0.00304981	9.06804	0.340065	0.253644	-0.163434	0.895103	0.97983	0.907717	0.235539	0.0282312	37.5854	5.88578	1277.1	272.228	0.0549997	126.397	2.27302	258.52	0.144954	0.0376672	0.515306	0.771594	0.84409	106.43	0.0292462	100.452	0.954749	18.5	8.85398	9.49841	0.501343	4.69703	0.531037	2.16675	-0.402623	22.0621	0.00656778	1.13229	106.992	0.11134
material41	BACKPROJTOF	437.135	227472	-1574.9	330.572	34.6256	0.810381	3.67783	4.48851	0.00235936	9.30644	0.314434	0.225858	-0.168731	0.905636	0.976607	0.89877	0.214181	0.0242798	38.1129	6.04691	1358.8	330.572	0.0494509	132.47	2.04593	254.74	0.120744	0.0360541	0.557039	0.797549	0.86139	113.801	0.0279899	107.049	0.987794	18.5	9.02358	9.49841	0.501343	5.06235	0.508436	1.88245	-0.192041	25.6274	0.0078913	1.07527	109.038	0.139295
material51	BACKPROJTOF	385.507	205471	-687.658	324.732	30.5299	0.828131	3.57999	4.10671	0.00259003	9.20883	0.338137	0.25202	-0.180558	0.916167	0.979379	0.906748	0.235252	0.0254118	35.3246	6.02895	1182.97	324.732	0.0480339	119.8	2.30784	246.331	0.1537	0.0384676	0.511751	0.768638	0.842871	100.985	0.0295794	94.8243	0.999527	18.5	8.39737	8.50024	0.501343	4.93072	0.500328	1.83135	-0.0588149	24.312	0.00788551	1.17932	102.05	0.120727
material61	BACKPROJTOF	341.096	152812	-132.907	260.97	26.5495	0.815324	3.48223	3.7765	0.00334024	8.97003	0.36145	0.279154	-0.188632	0.919707	0.980976	0.911485	0.256571	0.0238456	33.6149	5.91985	1027.99	260.97	0.0499614	109.817	2.60802	241.749	0.141323	0.0393024	0.475672	0.739754	0.82914	92.1211	0.0304396	83.4551	0.997688	18	7.95951	7.99805	0.500977	4.48379	0.501602	2.08284	-0.00576052	20.1044	0.00813617	1.26835	96.4965	0.0921663
material71	BACKPROJTOF	384.474	158788	-1212.83	257.764	26.6887	0.812351	3.49724	3.85879	0.00286963	8.98775	0.351228	0.267161	-0.183265	0.91485	0.98078	0.90939	0.248852	0.0168185	36.15	5.90838	1172.32	257.764	0.052869	117.186	2.40122	266.136	0.114361	0.0395651	0.491465	0.75618	0.833617	96.5453	0.0321178	93.6178	0.992936	18	8.54992	9	0.500977	4.5299	0.504889	2.14244	-0.243922	20.52	0.00687077	1.22446	99.2415	0.098427
material81	BACKPROJTOF	429.143	216153	-2752.06	298.244	24.7817	0.846566	3.45743	3.82746	0.00285481	8.9665	0.339867	0.251643	-0.189663	0.920494	0.982872	0.91143	0.238088	0.0211428	37.9883	5.91422	1326.99	298.244	0.0558713	125.618	2.13948	270.56	0.12418	0.0416235	0.527337	0.78225	0.847829	104.946	0.0329371	103.158	0.956554	18.5	8.92057	9.99976	0.501343	4.85651	0.529811	2.05694	-0.402937	23.5857	0.00569285	1.28726	95.3416	0.107277
material91	BACKPROJTOF	328.601	158191	-1956.88	285.001	16.7417	0.889033	3.19413	3.15711	0.00415867	8.56138	0.3711	0.284002	-0.223832	0.940458	0.986903	0.921293	0.271054	0.0299325	32.3442	5.77365	990.992	285.001	0.0583571	98.4472	2.3889	226.606	0.177401	0.0517216	0.480008	0.752022	0.826792	80.2772	0.0397377	78.2562	0.997194	17.5	7.55636	8.49792	0.499878	4.60033	0.501944	1.72451	-0.248121	21.163	0.00536186	1.60249	70.4866	0.0862654
material101	BACKPROJTOF	180.739	95458.1	734.009	243.167	11.6589	0.908495	2.95549	2.53025	0.0112053	7.86318	0.431967	0.355412	-0.265826	0.954071	0.987629	0.926496	0.314786	0.0752447	22.1687	5.47209	521.942	243.167	0.0655986	61.7124	3.32832	143.345	0.443208	0.0759244	0.370269	0.673702	0.769944	49.3336	0.0479176	41.7756	0.912856	15	5.01966	3.99902	0.501709	4.07254	0.559177	1.6956	0.381372	16.5856	0.00828777	2.10315	45.1343	0.064226
material11	BACKPROJ	190.612	157180	2197.96	263.154	15.4576	0.88904	3.01403	2.53594	0.01056	8.14014	0.494247	0.43445	-0.275216	0.962126	0.986818	0.934528	0.312916	0.0776606	22.6882	5.6813	552.386	263.154	0.0589659	62.6859	4.64309	236.413	0.473932	0.0810851	0.298388	0.599822	0.7334	47.2662	0.0526329	44.1038	0.846107	16.5	5.11456	4.49963	0.499512	4.23654	0.60282	2.32901	0.647749	17.9483	0.0162729	1.8838	61.7102	0.0689871
material21	BACKPROJ	358.545	208382	-768.759	330.484	26.2461	0.852853	3.47855	3.79423	0.00286984	9.08938	0.356357	0.272827	-0.196301	0.9283	0.981103	0.910894	0.254157	0.0276102	33.6146	6.01045	1092.47	330.484	0.0508947	105.056	2.35389	255.247	0.151912	0.0507722	0.48106	0.75414	0.826608	86.0192	0.0383453	85.2858	0.999871	18	7.77151	7.99805	0.500977	4.98933	0.500089	1.73561	-0.0100729	24.8934	0.00773399	1.29383	95.9919	0.112372
material31	BACKPROJ	393.015	162494	-1925.47	247.968	29.0532	0.790273	3.54272	4.01881	0.00277627	9.05538	0.33839	0.252081	-0.156335	0.886021	0.980282	0.908368	0.24421	0.0193538	36.7851	5.85553	1204.61	247.968	0.0562187	119.751	2.18339	245.831	0.120232	0.0383068	0.511809	0.773708	0.840577	100.404	0.0297821	95.1866	0.969708	18.5	8.6447	9.49841	0.501343	4.52314	0.520849	2.197	-0.384384	20.4588	0.00656269	1.13654	107.506	0.103221
material41	BACKPROJ	418.355	194209	-1278.27	305.904	33.8031	0.801	3.66053	4.45368	0.00212014	9.29667	0.312719	0.223364	-0.161516	0.89716	0.977099	0.899305	0.215034	0.0168115	37.4342	6.01815	1292.87	305.904	0.0503661	124.449	1.95055	246.179	0.0974042	0.0370754	0.558565	0.802446	0.860253	105.632	0.0294248	102.062	0.991754	18.5	8.83057	9.00159	0.501343	4.9078	0.505704	1.88288	-0.178067	24.0865	0.0076419	1.08775	109.844	0.129857
material51	BACKPROJ	363.031	186291	-557.278	310.362	29.4368	0.82674	3.55382	4.04641	0.0025996	9.16145	0.337558	0.251046	-0.179309	0.914033	0.979008	0.905653	0.24041	0.0237587	34.2228	5.99762	1107.02	310.362	0.0497355	112.15	2.19065	223.167	0.1426	0.0417138	0.516328	0.774786	0.843339	94.2492	0.0320569	88.5121	0.999809	18	8.0646	7.99805	0.500977	4.84538	0.500133	1.80833	-0.0308853	23.4777	0.0078773	1.19689	102.962	0.114696
material61	BACKPROJ	320.347	138290	-20.2878	249.542	25.4779	0.81472	3.45643	3.70859	0.00325541	8.93741	0.36395	0.281749	-0.186775	0.917318	0.981679	0.912788	0.259269	0.0213733	32.5165	5.88935	958.55	249.542	0.0516486	102.965	2.53124	218.734	0.140253	0.0425704	0.4722	0.742503	0.825197	86.4909	0.0323338	77.582	0.992106	18	7.62261	7.50146	0.500977	4.4137	0.505461	2.05057	0.0281055	19.4808	0.00811071	1.28569	97.7893	0.0883282
material71	BACKPROJ	360.024	146797	-1082.9	249.449	25.5221	0.814366	3.46775	3.77432	0.00306628	8.9286	0.355008	0.271144	-0.183684	0.914193	0.980568	0.908919	0.252589	0.0221708	34.8736	5.87605	1090.31	249.449	0.0545451	108.788	2.39867	251.44	0.122776	0.0435387	0.489734	0.756224	0.832298	89.6841	0.0346624	86.379	0.998859	17.5	8.13064	8.49792	0.499878	4.50277	0.500791	2.06465	-0.201555	20.275	0.00794197	1.25251	84.9192	0.105167
material81	BACKPROJ	403.996	199644	-2521.55	288.165	23.8022	0.847407	3.43107	3.74571	0.00320049	8.90647	0.344723	0.256888	-0.19043	0.920163	0.982636	0.911022	0.241479	0.0276207	36.7644	5.88027	1241.99	288.165	0.0584687	116.864	2.08165	244.079	0.128661	0.0473006	0.523913	0.782693	0.845168	97.3064	0.0375477	95.1474	0.977295	18	8.46596	9.50098	0.500977	4.84555	0.515655	1.95833	-0.343546	23.4793	0.00575315	1.31526	95.6022	0.103116
material91	BACKPROJ	319.462	141812	-1846.67	266.7	16.3342	0.884578	3.17806	3.12105	0.00399594	8.52324	0.373255	0.28645	-0.222053	0.938649	0.986472	0.920066	0.27351	0.0233685	32.0544	5.74965	958.638	266.7	0.061097	93.081	2.31385	215.937	0.166219	0.0555301	0.474127	0.753508	0.82147	74.5993	0.0431667	74.748	0.992501	17	7.3693	8.5	0.498047	4.5218	0.505189	1.71499	-0.236577	20.4466	0.00536446	1.60902	71.6708	0.0827988
material101	BACKPROJ	176.756	88528.2	631.862	234.602	11.4363	0.907036	2.94764	2.50687	0.0111861	7.83689	0.435773	0.358715	-0.26531	0.953435	0.987847	0.927094	0.305903	0.0761791	21.9968	5.45509	508.229	234.602	0.0760557	57.7001	3.05931	132.523	0.399483	0.0847822	0.393838	0.690045	0.784229	46.8282	0.0580143	39.3442	0.898046	15	4.81642	3.50098	0.501709	4.01906	0.568988	1.71213	0.420817	16.1529	0.00832155	2.10372	47.5345	0.0620528
material11	ITERATIVETOF	234.441	232960	3109.11	329.225	21.4163	0.877846	3.17023	2.90981	0.00673927	8.45316	0.476271	0.416386	-0.26382	0.960946	0.984149	0.930451	0.311321	0.0459038	25.0989	5.84286	700.021	329.225	0.0475143	78.78	5.30206	316.433	0.502129	0.0681848	0.319699	0.596898	0.759905	60.487	0.0476145	57.213	0.904057	17.5	5.90232	4.4989	0.499878	4.73077	0.565015	2.17878	0.59971	22.3802	0.0176806	1.52526	79.459	0.0969568
material21	ITERATIVETOF	380.155	237134	-719.522	356.491	32.3865	0.833437	3.60273	4.09835	0.00239877	9.26765	0.354089	0.272511	-0.182086	0.918599	0.978387	0.907766	0.246152	0.0173538	34.5907	6.05911	1170.54	356.491	0.0461279	117.495	2.49522	272.972	0.165472	0.0432803	0.487833	0.748835	0.834128	97.6611	0.033297	93.6596	0.999232	18.5	8.21327	8.50024	0.501343	5.1192	0.500532	1.74785	-0.0147022	26.2062	0.00932495	1.09633	107.757	0.141636
material31	ITERATIVETOF	436.787	193474	-1851.24	271.295	38.5713	0.751053	3.7206	4.5475	0.00238195	9.29543	0.320887	0.233289	-0.14584	0.876719	0.975876	0.900998	0.218219	0.0193604	38.9156	5.94836	1358.13	271.295	0.0524155	136.07	2.23477	264.165	0.12985	0.0331067	0.542205	0.786022	0.856534	116.849	0.0273146	108.231	0.910889	19	9.27504	9.5	0.500977	4.71248	0.560485	2.27823	-0.340374	22.2075	0.0075655	0.945599	140.226	0.122442
material41	ITERATIVETOF	454.288	238905	-1244.88	343.347	44.22	0.771815	3.83213	4.94911	0.00208913	9.45984	0.305284	0.218048	-0.154012	0.891093	0.972481	0.89329	0.203033	0.0206146	38.9619	6.08256	1424.4	343.347	0.0476801	141.706	2.19866	255.941	0.15406	0.0329266	0.579656	0.803136	0.87372	123.907	0.0271834	113.298	0.97439	19	9.30342	9.5	0.500977	5.17183	0.517646	1.87597	-0.138772	26.7479	0.00833537	0.903719	147.76	0.15578
material51	ITERATIVETOF	397.696	227768	-192.879	342.555	38.7179	0.796903	3.70955	4.48181	0.00238654	9.35547	0.331212	0.246539	-0.172819	0.910847	0.974736	0.900492	0.230303	0.0233603	35.8741	6.08503	1229.94	342.555	0.0459672	128.298	2.43091	239.976	0.180544	0.0363209	0.528073	0.773557	0.852348	110.696	0.0287707	99.1129	0.999831	18.5	8.56049	8.50024	0.501343	5.08278	0.500117	1.8509	0.0247817	25.8347	0.0109848	0.992982	115.259	0.153378
material61	ITERATIVETOF	355.81	165651	319.26	274.21	34.7395	0.775112	3.64048	4.19634	0.00322597	9.10428	0.354037	0.272978	-0.17819	0.911916	0.977103	0.9062	0.241922	0.0191483	34.406	5.95513	1083.66	274.21	0.0487	117.421	2.66763	243.336	0.146206	0.0381475	0.489502	0.744405	0.837554	100.297	0.0308039	88.2298	0.997734	18.5	8.17457	7.9989	0.501343	4.62704	0.50157	2.08903	0.0826313	21.4095	0.0112226	1.05398	112.119	0.119694
material71	ITERATIVETOF	402.407	163043	-848.378	262.398	34.3697	0.768373	3.65479	4.30615	0.00266524	9.15396	0.336042	0.251927	-0.167061	0.900873	0.977099	0.903263	0.234472	0.0185302	37.1699	5.94794	1237.21	262.398	0.0507724	126.662	2.44363	271.832	0.101777	0.0353113	0.525283	0.768606	0.852502	107.974	0.0298439	99.8185	0.989836	18.5	8.88198	9.00159	0.501343	4.5752	0.507029	2.18296	-0.178828	20.9325	0.00889721	1.02862	114.042	0.120965
material81	ITERATIVETOF	450.562	224380	-2594.77	299.441	31.0758	0.811957	3.60424	4.24913	0.00234506	9.1669	0.320517	0.231365	-0.168629	0.902896	0.979936	0.905497	0.225101	0.0136437	39.1648	5.95899	1402.07	299.441	0.0545239	135.124	2.04211	262.679	0.110459	0.0377911	0.564514	0.801204	0.864781	115.32	0.0319121	110.428	0.910338	19	9.31652	10.001	0.500977	4.86156	0.56085	2.1772	-0.403343	23.6348	0.0061771	1.0832	126.835	0.115714
material91	ITERATIVETOF	332.102	179185	-1817.46	305.48	20.3723	0.87496	3.32309	3.4342	0.00399748	8.70621	0.360224	0.27349	-0.211134	0.933801	0.98584	0.919555	0.261276	0.0275877	32.3002	5.81473	1006.96	305.48	0.0557926	103.276	2.52541	223.455	0.220326	0.0500547	0.467045	0.745663	0.819544	84.9045	0.0364102	80.1224	0.997755	18.5	7.59845	8.50024	0.501343	4.73201	0.501556	1.73874	-0.189005	22.3919	0.00599567	1.36003	92.9681	0.0962494
material101	ITERATIVETOF	181.378	101277	854.902	246.243	15.0215	0.885009	3.11001	2.81907	0.00986433	8.02397	0.417995	0.340954	-0.243026	0.944129	0.985279	0.921852	0.300695	0.0637892	22.2326	5.50149	526.173	246.243	0.0609863	65.8416	3.36915	139.798	0.457596	0.0700997	0.371376	0.675349	0.769711	54.2025	0.0410083	43.1536	0.881859	15.5	5.12334	3.99988	0.499512	4.11251	0.579628	1.76816	0.392557	16.9128	0.0108946	1.73953	50.6855	0.0795531
material11	ITERATIVE	232.672	233678	3225.63	328.293	20.0638	0.884809	3.12876	2.82153	0.0066849	8.43	0.478234	0.418986	-0.267143	0.962116	0.985832	0.933805	0.322209	0.0406277	24.9491	5.84031	693.439	328.293	0.0459566	79.6168	5.31942	309.367	0.521021	0.0653738	0.316556	0.595214	0.75738	61.1353	0.0452218	57.0568	0.905773	18	5.9073	4.5	0.500977	4.70798	0.563879	2.20246	0.614754	22.1651	0.0131629	1.61607	86.7744	0.0814707
material21	ITERATIVE	378.01	233223	-624.862	351.485	30.0211	0.842619	3.55103	3.95609	0.00236092	9.24058	0.35556	0.27319	-0.187793	0.923421	0.979866	0.910381	0.253453	0.0157241	34.5047	6.06203	1160.47	351.485	0.0460827	117.63	2.49783	265.543	0.165113	0.0417892	0.489432	0.749708	0.834941	98.0978	0.0319782	93.2592	0.998887	18.5	8.22418	8.50024	0.501343	5.06226	0.500771	1.77543	-0.0161911	25.6264	0.00874536	1.17686	100.073	0.12944
material31	ITERATIVE	434.874	188425	-1843.54	265.663	36.0683	0.760934	3.66974	4.37182	0.00242853	9.24477	0.328969	0.242276	-0.15118	0.88304	0.977362	0.904371	0.229231	0.0175039	38.8575	5.93927	1349.27	265.663	0.0526517	135.792	2.27389	268.953	0.127035	0.0325047	0.531251	0.778208	0.852378	116.186	0.0267411	107.594	0.905371	19	9.27185	10.001	0.500977	4.65076	0.564145	2.31806	-0.358519	21.6296	0.00693878	1.00459	132.72	0.112343
material41	ITERATIVE	451.219	231288	-1107.75	334.68	41.393	0.779876	3.7872	4.78763	0.00206324	9.42107	0.309944	0.222258	-0.161149	0.899136	0.974106	0.896182	0.206632	0.0181345	38.8791	6.08165	1410.36	334.68	0.0474397	140.34	2.26871	262.928	0.157455	0.0324016	0.563525	0.794918	0.866913	121.529	0.0267136	112.324	0.97424	19	9.29258	9.5	0.500977	5.09668	0.517749	1.91554	-0.135608	25.9762	0.0081236	0.954283	138.961	0.143577
material51	ITERATIVE	397.665	226518	-167.505	340.651	36.7322	0.805333	3.67059	4.34324	0.00249619	9.30683	0.33799	0.253253	-0.181862	0.91907	0.977105	0.905333	0.232409	0.0240964	35.8712	6.08369	1227.94	340.651	0.04546	129.187	2.52947	248.174	0.184182	0.0356321	0.514327	0.762435	0.847497	111.008	0.0281418	99.1188	0.996208	19	8.58041	8.49805	0.500977	5.04967	0.502626	1.86751	0.0226407	25.4991	0.00873055	1.05059	126.865	0.128196
material61	ITERATIVE	352.946	167686	300.282	274.449	32.4106	0.788761	3.58492	4.02742	0.00340004	9.0461	0.360777	0.280029	-0.187378	0.919798	0.978575	0.909526	0.251575	0.0194052	34.2015	5.95676	1072.22	274.449	0.0484131	117.105	2.71476	241.629	0.149123	0.038093	0.479138	0.738246	0.832539	99.5357	0.0302937	87.4798	0.997863	18.5	8.14299	7.9989	0.501343	4.6016	0.501481	2.1064	0.0750742	21.1747	0.0103231	1.12922	105.179	0.110573
material71	ITERATIVE	400.237	157065	-955.034	257.441	32.3407	0.776793	3.6062	4.14457	0.00283605	9.088	0.343297	0.259165	-0.173486	0.906702	0.978427	0.906514	0.24069	0.0204017	37.0924	5.93118	1228.46	257.441	0.0510569	126.016	2.53347	275.682	0.106198	0.0350606	0.510658	0.759794	0.84609	106.127	0.0299455	99.3513	0.987534	18.5	8.88766	9.00159	0.501343	4.51268	0.508616	2.19489	-0.213756	20.3643	0.00801848	1.08937	108.856	0.111737
material81	ITERATIVE	451.929	222268	-2682.54	297.009	29.7018	0.818177	3.56978	4.13217	0.00241132	9.12392	0.325829	0.236962	-0.173031	0.90688	0.979822	0.905723	0.232488	0.0130968	39.2481	5.94589	1406.04	297.009	0.0544321	135.443	2.08677	269.608	0.111438	0.037248	0.552479	0.79463	0.85966	114.778	0.0313823	110.828	0.934518	18.5	9.35569	9.99976	0.501343	4.82739	0.544697	2.19877	-0.430835	23.3037	0.00650562	1.13147	106.21	0.121757
material91	ITERATIVE	338.503	176872	-2005.99	301.769	20.0669	0.875298	3.3097	3.41018	0.00385733	8.69102	0.359249	0.272091	-0.210354	0.932953	0.9853	0.918097	0.264453	0.0239001	32.7461	5.80437	1027.63	301.769	0.0564569	104.998	2.49757	225.336	0.208539	0.0489527	0.475165	0.749933	0.823982	86.4264	0.0363827	81.8628	0.994724	18	7.72824	9	0.500977	4.70565	0.503652	1.7528	-0.236267	22.1431	0.00557903	1.39814	91.1216	0.0928118
material101	ITERATIVE	186.865	100717	731.136	247.399	15.0735	0.885142	3.11294	2.84359	0.00872784	8.05923	0.411984	0.333915	-0.241957	0.944049	0.985214	0.921122	0.302437	0.0531668	22.6966	5.51952	542.45	247.399	0.0612057	66.2339	3.26978	143.217	0.434552	0.0694401	0.378051	0.683428	0.771254	53.5991	0.0423403	44.5898	0.899827	15.5	5.24892	4.49939	0.499512	4.12877	0.567812	1.72883	0.352479	17.0467	0.0104271	1.7414	50.0744	0.0802151
material11	TRUEX	280.412	389306	5157.36	423.674	26.8183	0.880939	3.28322	3.20023	0.00686688	8.66325	0.461803	0.40101	-0.260836	0.962102	0.9849	0.932958	0.307757	0.0414899	26.922	5.9542	863.322	423.674	0.0430769	98.2285	4.90442	297.362	0.543354	0.0631718	0.334232	0.611146	0.767364	77.8127	0.0433557	68.8495	0.926527	20	6.35279	4.50195	0.498047	5.3383	0.550057	2.25722	0.684381	28.4974	0.0123318	1.44643	118.167	0.0947951
material21	TRUEX	419.032	297929	-326.77	393.689	36.1455	0.831819	3.66629	4.30369	0.00202834	9.47418	0.342131	0.259075	-0.179977	0.920048	0.979415	0.910089	0.241129	0.0127796	36.3123	6.16554	1302.52	393.689	0.0433644	129.287	2.39951	284.051	0.148884	0.0403809	0.504988	0.759509	0.841928	109.199	0.0310128	103.61	0.996452	20	8.64763	8.99902	0.498047	5.36962	0.502457	1.82316	0.0385199	28.8329	0.00788997	1.1154	133.362	0.124738
material31	TRUEX	480.65	237170	-1530.07	301.548	45.3631	0.738484	3.81083	4.83903	0.00208962	9.50094	0.31375	0.227416	-0.145531	0.880474	0.978785	0.908244	0.22034	0.0157483	40.8217	6.05559	1510.23	301.548	0.0487223	150.353	2.16608	279.266	0.109605	0.0313945	0.550738	0.789121	0.860757	130.903	0.026135	119.426	0.93065	22	9.72953	10.001	0.499512	4.97651	0.547295	2.31647	-0.234366	24.7657	0.00599041	0.922846	200.651	0.10515
material41	TRUEX	499.753	289147	-730.088	377.047	51.2066	0.760865	3.92331	5.28087	0.00176154	9.66279	0.295091	0.207718	-0.154525	0.895536	0.972816	0.894474	0.193136	0.015356	40.9044	6.18075	1582.78	377.047	0.0445475	156.623	2.14389	268.956	0.138451	0.0305724	0.600366	0.812592	0.882602	139.682	0.025718	124.954	0.981424	20.5	9.77176	9.49927	0.500488	5.42874	0.512821	1.92019	-0.0538405	29.4712	0.00893148	0.878405	162.861	0.160813
material51	TRUEX	439.784	305544	557.172	393.379	45.5557	0.792427	3.80196	4.78301	0.00224413	9.54585	0.323109	0.238447	-0.177994	0.91931	0.975917	0.90398	0.223001	0.0230929	37.5675	6.19881	1377.37	393.379	0.0423554	143.476	2.40618	253.461	0.165833	0.0345279	0.538625	0.775916	0.858355	125.946	0.0275738	110.076	0.999124	20.5	8.97632	8.49829	0.500488	5.43192	0.500607	1.92598	0.12732	29.5057	0.0105077	0.975611	144.565	0.145202
material61	TRUEX	390.471	216772	985.377	311.027	40.4274	0.769943	3.71418	4.44437	0.00307428	9.25671	0.345188	0.263964	-0.18234	0.918668	0.977428	0.908234	0.240982	0.0189988	35.9345	6.05252	1203.96	311.027	0.045918	129.894	2.58699	245.181	0.136907	0.0362294	0.510668	0.754965	0.84811	113.051	0.0298143	97.2517	0.999484	20	8.55089	7.99805	0.498047	4.91302	0.500358	2.16318	0.184626	24.1378	0.00998988	1.03858	142.957	0.112056
material71	TRUEX	441.792	198943	-685.693	292.565	40.0124	0.75938	3.73178	4.53462	0.0025347	9.31336	0.333047	0.249762	-0.169984	0.907093	0.979366	0.909765	0.231554	0.0198498	38.9181	6.03683	1373.74	292.565	0.0472117	139.968	2.46818	289.21	0.0965287	0.0333381	0.52784	0.767292	0.854752	119.767	0.028898	110.251	0.980163	21	9.33139	9.50024	0.502441	4.81463	0.513687	2.18776	-0.119854	23.1806	0.00657434	1.00644	168.572	0.101505
material81	TRUEX	502.34	275085	-2863.86	330.654	36.1423	0.80293	3.6926	4.48569	0.00211752	9.32802	0.316101	0.227683	-0.1675	0.904627	0.979187	0.905776	0.22181	0.0122719	41.4107	6.04203	1581.6	330.654	0.0513461	150.778	2.00199	283.774	0.101008	0.0356744	0.577519	0.807569	0.870446	130.635	0.0304273	123.505	0.913126	20	9.86693	10.498	0.498047	5.11411	0.558998	2.20402	-0.388987	26.1541	0.0057863	1.06388	142.86	0.118342
material91	TRUEX	380.867	227580	-2275.93	336.668	24.4401	0.864638	3.43472	3.71873	0.00335857	8.91424	0.346122	0.258748	-0.202903	0.930817	0.985545	0.919633	0.25379	0.0222304	34.8029	5.9099	1171.47	336.668	0.0540233	117.307	2.33423	234.466	0.187099	0.0474198	0.499929	0.765931	0.835448	98.4353	0.0360112	92.1082	0.9847	20	8.19477	9.50195	0.498047	4.99608	0.510568	1.80308	-0.218619	24.9608	0.00484753	1.33855	120.013	0.0888917
material101	TRUEX	219.956	148382	1055.99	294.17	19.3414	0.876615	3.26921	3.20124	0.007443	8.32953	0.39064	0.310085	-0.236997	0.945252	0.985932	0.923316	0.28263	0.0478767	24.5967	5.66163	652.706	294.17	0.0600612	76.302	3.00418	152.42	0.379078	0.0685482	0.41807	0.707882	0.796681	64.7918	0.0434597	52.3072	0.934726	18	5.65121	4.5	0.500977	4.51454	0.544558	1.8142	0.38863	20.381	0.00758393	1.64775	80.7484	0.0713013
material11	TRUEXTOF	270.986	333590	4328.72	396.869	27.7546	0.869275	3.31678	3.28223	0.00620183	8.6818	0.455358	0.393225	-0.248921	0.956705	0.98283	0.928327	0.301721	0.0358433	26.7363	5.93483	829.569	396.869	0.0462144	93.468	4.61684	284.357	0.486643	0.0662798	0.344231	0.622772	0.77152	74.189	0.0467485	66.2062	0.942188	19	6.26416	5.00049	0.500977	5.19348	0.539534	2.20079	0.648848	26.9722	0.0146721	1.36988	111.549	0.104609
material21	TRUEXTOF	399.19	270593	-374.203	377.602	37.6784	0.818541	3.69575	4.40263	0.00214258	9.4531	0.339858	0.257716	-0.171286	0.910962	0.977533	0.906363	0.241485	0.0149375	35.4519	6.12599	1237.61	377.602	0.044495	123.887	2.43905	276.255	0.159019	0.0419672	0.508387	0.759481	0.844439	105.007	0.0322656	98.6716	0.998726	19.5	8.41119	8.49792	0.499878	5.28472	0.500883	1.79723	0.0454157	27.9283	0.00959414	1.04654	124.949	0.142519
material31	TRUEXTOF	457.919	210616	-1210.47	285.774	46.634	0.719421	3.8414	4.96538	0.00201762	9.51565	0.306432	0.219131	-0.135667	0.865978	0.976203	0.902176	0.210707	0.0153736	39.9066	6.02734	1433.58	285.774	0.0495041	143.749	2.06328	262.187	0.0959679	0.0315305	0.562386	0.798608	0.864436	125.813	0.0261037	114.075	0.950517	21	9.5056	9.50024	0.502441	4.87056	0.533905	2.30006	-0.195695	23.7224	0.00709899	0.884849	185.573	0.115192
material41	TRUEXTOF	475.074	266269	-684.171	366.138	52.4123	0.74956	3.94013	5.35424	0.00178515	9.6594	0.292718	0.205993	-0.145674	0.883803	0.972171	0.893216	0.195628	0.0167392	39.8318	6.14889	1500.68	366.138	0.0450471	149.232	2.10663	258.967	0.132944	0.0312762	0.593381	0.811264	0.878867	132.271	0.0259213	119.182	0.987903	20.5	9.51291	9.49927	0.500488	5.35641	0.508362	1.8783	-0.0394364	28.6911	0.00905457	0.843874	171.417	0.163067
material51	TRUEXTOF	416.861	265329	521.73	367.67	45.8457	0.778264	3.81337	4.8383	0.00209479	9.53878	0.318199	0.233093	-0.1654	0.906097	0.974573	0.900812	0.221682	0.019098	36.6827	6.15714	1299.48	367.67	0.0441866	135.901	2.19681	232.805	0.134092	0.0355645	0.554418	0.789403	0.863122	120.278	0.0283249	104.332	0.999927	20	8.7414	8.50098	0.498047	5.28436	0.50005	1.91455	0.131634	27.9245	0.010508	0.937912	154.202	0.143146
material61	TRUEXTOF	371.669	191835	1060.51	294.104	41.4624	0.752882	3.74722	4.54874	0.00317395	9.24651	0.340906	0.259733	-0.170577	0.90649	0.976781	0.906173	0.234732	0.0214155	35.1288	6.00702	1142.18	294.104	0.0467897	125.099	2.60936	235.017	0.131018	0.0362979	0.513016	0.755194	0.849644	109.309	0.0298948	92.8963	0.99657	20	8.35931	7.99805	0.498047	4.7981	0.502376	2.15975	0.215639	23.0218	0.0104908	0.988885	152.18	0.112447
material71	TRUEXTOF	419.65	181586	-374.796	279.79	40.5222	0.746984	3.75557	4.62273	0.00243527	9.32237	0.32833	0.244672	-0.161272	0.897316	0.977041	0.904125	0.223815	0.0155272	37.9385	6.01232	1299.07	279.79	0.0481101	133.76	2.4009	271.99	0.092443	0.0333464	0.538362	0.774721	0.858772	115.392	0.0287571	104.892	0.989986	20	9.0877	8.99902	0.498047	4.72326	0.506925	2.19009	-0.0656157	22.3092	0.00815575	0.968231	153.948	0.111996
material81	TRUEXTOF	472.522	241720	-2383.19	311.378	36.124	0.792094	3.69871	4.52772	0.00209618	9.31645	0.312253	0.22372	-0.160763	0.896588	0.978123	0.902726	0.219838	0.0118732	40.185	6.01674	1478.85	311.378	0.0522	142.479	1.96059	266.126	0.0959527	0.0364204	0.580537	0.810303	0.87119	123.45	0.0310156	116.248	0.936616	19.5	9.56209	10.0023	0.499878	4.98193	0.543287	2.18872	-0.346244	24.8197	0.00697426	1.03485	129.195	0.128011
material91	TRUEXTOF	353.704	197898	-1884.98	313.806	23.5717	0.860265	3.41762	3.67212	0.00342529	8.86902	0.348592	0.260819	-0.200588	0.928212	0.984579	0.916788	0.249217	0.0227876	33.5348	5.87577	1078.83	313.806	0.0553124	110.261	2.30631	219.567	0.186318	0.048427	0.507835	0.769316	0.839741	93.2681	0.0367182	85.5112	0.98283	19	7.88664	8.99902	0.500977	4.82893	0.511854	1.81013	-0.187681	23.3186	0.00564247	1.32878	106.652	0.0922417
material101	TRUEXTOF	203.869	129212	989.679	271.163	18.5871	0.871703	3.24492	3.12865	0.00784705	8.2685	0.398205	0.318457	-0.234397	0.942703	0.985712	0.923032	0.281674	0.0512401	23.7255	5.62047	598.956	271.163	0.0610358	72.0287	3.05907	144.691	0.383046	0.0699297	0.409466	0.700446	0.793095	61.2319	0.0442169	48.4841	0.909814	17.5	5.44517	4.4989	0.499878	4.34091	0.561198	1.86261	0.404858	18.8435	0.00877238	1.65716	70.444	0.0733758
[truncated: 1 more columns]

[truncated: 4 more sheets: SubsetsxIter_64Levels, SubsetsxIter_FixBinSize, SubsetsxIterNonTOF_64Levels, SubsetsxIterNonTOF_FixBinSize]
